# Supplementary material for: Ultrasound-assisted ionic liquid-mediated green method for synthesis of 1,3-diphenylpyrazole-based spirooxindolopyrrolizidines, their anti-tubercular activity, molecular docking study and ADME predictions
Source: Royal Society of Chemistry journal article supplement (doi:10.1039/d4nj00563e), 2024-01-01
Supplement: d4nj00563e2.pdf [file d4nj00563e2.pdf]

## Supporting information

### **Ultrasound-assisted ionic liquid-mediated green method for synthesis of 1,3-diphenylpyrazole-based spirooxindolopyrrolizidines, their anti-tubercular activity, molecular docking study and ADME predictions**

**Sravanthi Baddepuri<sup>a</sup>, Rama Krishna Gamidi<sup>b</sup>, Jyothi kumari<sup>c</sup>, Dharmarajan Sriram<sup>c</sup>, Srinivas Basavoju<sup>a, \*</sup>**

<sup>a</sup>Department of Chemistry, National Institute of Technology Warangal, Hanamkonda-506 004, Telangana, India.

<sup>b</sup>Organic Chemistry Division, CSIR-National Chemical Laboratory, Dr. Homi Bhabha Road, Pune, Maharashtra 411 008, India.

<sup>c</sup>Department of Pharmacy, Birla Institute of Technology & Science-Pilani, Hyderabad Campus, Jawahar Nagar, Hyderabad-500 078, Telangana, India.

\*Corresponding author. E-mail: [basavojusrinivas@nitw.ac.in](mailto:basavojusrinivas@nitw.ac.in)

Mobile: (+91) 9703351571.

## CONTENTS

|                                                                                          |         |
|------------------------------------------------------------------------------------------|---------|
| 1. General information.....                                                              | S3      |
| 2. Spectral data of compounds (4a-4ad).....                                              | S4-S13  |
| 3. FT-IR, NMR, Mass spectra of compounds (4a-4ad).....                                   | S14-S73 |
| 4. Salient features of crystallographic data of compounds '4b'.....                      | S74     |
| 5. <i>In-vitro</i> MTB MABA assay.....                                                   | S75     |
| 6. Cytotoxicity <i>MTT</i> assay.....                                                    | S75     |
| 7. Molecules 4a-4ad with their stereochemical configurations used in silico studies..... | S76-S78 |
| 8. Bulk purity of the synthesized compound 4c with spectra.....                          | S79     |

## 1. General information

The chemicals isatin with purity 98% was purchased from Spectrochem, Mumbai and L-proline with purity 99% was purchased from Sisco Research Laboratories (SRL) Pvt. Ltd., Mumbai. The ionic liquid [Bmim]BF<sub>4</sub> with purity >98.0% was purchased from Tokyo Chemical Industry (TCI), Tokyo, Japan. All the acetophenones with purity 99% were purchased from Finar chemicals Ltd., Ahmedabad, India. Phenylhydrazine with purity 98% was purchased from AVRA synthesis Pvt. Ltd., Hyderabad, India. All the solvents were purchased from Merck chemicals, Mumbai. The compounds were used without further purification. All the melting points were determined by using Stuart SMP30 melting point apparatus (Bibby Scientific Ltd. United Kingdom) and were uncorrected. Ultrasonication irradiation was performed on PCi-Analytics-6.5L200H1DTC ultrasonic cleaner, the frequency of ultrasonic cleaner is 25 kHz, input voltage range of 170–270VAC at 50 Hz and output power is 250 W (Mumbai, India). The reaction progress was checked with TLC plates (E. Merck, Mumbai, India). IR spectra were recorded on KBr disc by using Perkin-Elmer 100S spectrophotometer (Perkin-Elmer Ltd. United Kingdom) from 400–4000 cm<sup>-1</sup> and Bruker spectrometer. <sup>1</sup>H and <sup>13</sup>C NMR spectra were recorded on Avance-III Bruker-400 MHz spectrometer (Bruker Corporation Ltd., Germany) using DMSO-*d*<sub>6</sub> and CDCl<sub>3</sub> as solvents and TMS as an internal standard, chemical shifts were expressed in ppm. Mass spectra were recorded on a Jeol JMSD-300 spectrometer (Jeol Ltd., Tokyo, Japan) in acetonitrile solvent. The single crystal X-ray diffraction data of the compound **4b** was collected and solved by using Bruker Kappa Apex II CCD diffractometer and ShelXT software. Molecular docking studies were performed by using AutoDock Tools-1.5.6 software and visualized by Discovery studio.

## 2. Spectral data for compounds

**(dl)-2'-(benzoyl)-1'-(1,3-diphenyl-1H-pyrazol-4-yl)-1',2',5',6',7',7a'-hexahydrospiro[indoline-3,3'-pyrrolizin]-2-one (4a).** White Solid. mp: 179-180 °C. IR (KBr, cm<sup>-1</sup>): 3248, 1731, 1674, 1598.

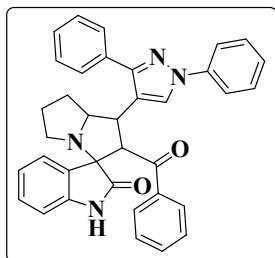

<sup>1</sup>H NMR (400 MHz, CDCl<sub>3</sub>) δ: 8.11 (s, 1H), 7.92 (d, *J* = 6.8 Hz, 2H), 7.72 (d, *J* = 8.4 Hz, 2H), 7.56 (t, *J* = 7.6 Hz, 2H), 7.49 – 7.46 (m, 1H), 7.42 (t, *J* = 7.2 Hz, 4H), 7.37 (d, *J* = 7.6 Hz, 1H), 7.31 (s, 1H), 7.25 (s, 1H), 7.23 (t, *J* = 7.6 Hz, 2H), 7.12 (dd, *J* = 14.4, 7.6 Hz, 2H), 7.00 (t, *J* = 7.6 Hz, 1H), 6.51 (d, *J* = 7.6 Hz, 1H), 4.98 (d, *J* = 11.6 Hz, 1H), 4.23 (t, *J* = 11.6 Hz, 1H), 4.04 (q, *J* = 6.4 Hz, 1H), 2.56 (dd, *J* = 12.8, 7.2 Hz, 2H), 1.85 (dd, *J* = 12.4, 6.4 Hz, 1H), 1.74 (dd, *J* = 9.6, 7.2 Hz, 2H), 1.45 (dd, *J* = 12.4, 7.2 Hz, 1H). <sup>13</sup>C NMR (101 MHz, CDCl<sub>3</sub>) δ: 197.19, 180.74, 153.15, 140.49, 139.97, 137.12, 133.75, 132.99, 129.47, 129.36, 129.10, 128.59, 128.21, 128.10, 127.93, 127.45, 126.29, 125.04, 124.98, 122.42, 120.61, 118.95, 110.08, 73.61, 64.11, 48.11, 42.73, 30.26, 27.07. HRMS (ESI, *m/z*): [M+H]<sup>+</sup> calcd. For C<sub>36</sub>H<sub>30</sub>N<sub>4</sub>O<sub>2</sub>: 551.2442; Found: 535.2126.

**(dl)-1'-(1,3-diphenyl-1H-pyrazol-4-yl)-2'-(4-fluorobenzoyl)-1',2',5',6',7',7a'-hexahydrospiro[indoline-3,3'-pyrrolizin]-2-one (4b).** White Solid. mp: 179-180 °C. IR (KBr, cm<sup>-1</sup>): 3221, 1725, 1676, 1597.

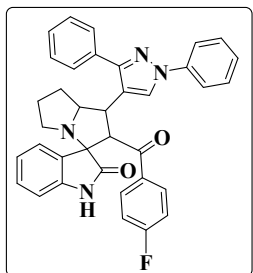

<sup>1</sup>H NMR (400 MHz, DMSO-*d*<sub>6</sub>) δ: 10.11 (s, 1H), 8.97 (s, 1H), 7.90 (d, *J* = 7.6 Hz, 4H), 7.62 (t, *J* = 7.2 Hz, 2H), 7.56 – 7.46 (m, 5H), 7.29 (t, *J* = 7.6 Hz, 1H), 7.14 (t, *J* = 8.8 Hz, 3H), 7.00 (dd, *J* = 13.6, 7.2 Hz, 2H), 6.52 (d, *J* = 8.0 Hz, 1H), 5.14 (d, *J* = 12.0 Hz, 1H), 4.07 (t, *J* = 11.2 Hz, 1H), 3.75 (dd, *J* = 15.6, 6.4 Hz, 1H), 2.38 (dd, *J* = 16.4, 7.2 Hz, 1H), 2.29 (dd, *J* = 11.2, 6.0 Hz, 1H), 1.62 (dt, *J* = 12.4, 6.4 Hz, 3H), 1.21 (dd, *J* = 11.2, 6.4 Hz, 1H). <sup>13</sup>C NMR (101 MHz, DMSO-*d*<sub>6</sub>) δ: 196.90, 179.41, 166.58, 164.08, 152.41, 142.36, 139.98, 134.15, 131.33, 131.23, 129.91, 129.39, 129.11, 128.87, 128.53, 126.96, 126.49, 125.05, 121.65, 120.75, 118.46, 115.69, 115.48, 110.17, 73.41, 73.11, 63.55, 47.71, 42.42, 30.03, 27.12. HRMS (ESI, *m/z*): [M+H]<sup>+</sup> calcd. for C<sub>36</sub>H<sub>29</sub>FN<sub>4</sub>O<sub>2</sub>: 569.2347; Found: 569.2347.

**(dl)-2'-(4-chlorobenzoyl)-1'-(1,3-diphenyl-1H-pyrazol-4-yl)-1',2',5',6',7',7a'-hexahydrospiro[indoline-3,3'-pyrrolizin]-2-one (4c).** White Solid. mp: 179-180 °C. IR (KBr, cm<sup>-1</sup>):

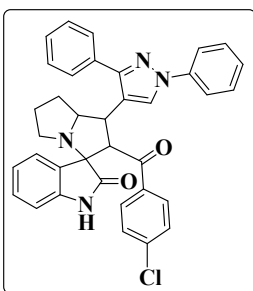

<sup>1</sup>H NMR (400 MHz, DMSO-*d*<sub>6</sub>) δ: 10.14 (s, 1H), 8.97 (s, 1H), 8.11 (d, *J* = 8.4 Hz, 1H), 7.96 (d, *J* = 7.6 Hz, 1H), 7.90 (d, *J* = 7.6 Hz, 3H), 7.69 (t, *J* = 5.2 Hz, 1H), 7.60 (d, *J* = 7.6 Hz, 2H), 7.50 (d, *J* = 7.6 Hz, 2H), 7.44 (s, 1H), 7.37 (d, *J* = 8.4 Hz, 2H), 7.29 (t, *J* = 7.2 Hz, 1H), 7.13 (t, *J* = 7.2 Hz, 1H), 7.00 (dd, *J* = 11.2, 6.4 Hz, 2H), 6.53 (d, *J* = 7.6 Hz, 1H), 5.14 (d, *J* = 11.2 Hz, 1H), 4.06 (t, *J* = 10.8 Hz, 1H), 3.75 (dd, *J* = 15.6, 6.4 Hz, 1H), 2.37 (t, *J* = 8.0 Hz, 1H), 2.29 (dd, *J* = 10.8, 4.0 Hz, 1H), 1.66 (dd, *J* = 11.2, 5.2 Hz, 1H), 1.61 – 1.54 (m, 2H), 1.21 (dd, *J* = 12.0, 5.2 Hz, 1H). <sup>13</sup>C NMR (101 MHz, DMSO-*d*<sub>6</sub>) δ: 197.39, 179.34, 152.41, 142.35, 139.97, 138.46, 136.14, 134.13, 130.59, 130.24, 130.15, 129.91, 129.43, 129.40, 129.12, 128.95, 128.87, 128.68, 128.54, 126.97, 126.51, 124.99, 121.70, 121.55, 120.70, 119.22, 118.46, 110.21, 73.42, 73.07, 63.61, 47.69, 42.38, 30.04, 27.13. HRMS (ESI, *m/z*): [M+H]<sup>+</sup> calcd. for C<sub>36</sub>H<sub>29</sub>ClN<sub>4</sub>O<sub>2</sub>: 585.2052; Found: 585.2059.

**(dl)-1'-(1,3-diphenyl-1H-pyrazol-4-yl)-2'-(4-methoxybenzoyl)-1',2',5',6',7',7a'-hexahydrospiro**



**[indoline-3,3'-pyrrolizin]-2-one (4d).** White Solid. mp: 179-180 °C. IR (KBr, cm<sup>-1</sup>): 3391, 1721,

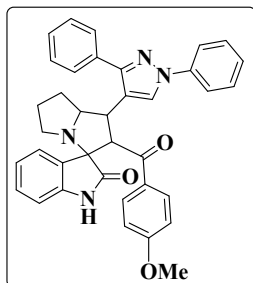

1668, 1599. <sup>1</sup>H NMR (400 MHz, DMSO-*d*<sub>6</sub>) δ: 10.13 (s, 1H), 8.93 (s, 1H), 7.90 (t, *J* = 7.6 Hz, 4H), 7.60 (d, *J* = 7.6 Hz, 2H), 7.50 (dd, *J* = 10.8, 8.8 Hz, 5H), 7.28 (t, *J* = 7.6 Hz, 1H), 7.10 (t, *J* = 7.6 Hz, 1H), 7.05 (d, *J* = 6.8 Hz, 1H), 6.96 (t, *J* = 7.6 Hz, 1H), 6.82 (d, *J* = 8.8 Hz, 2H), 6.54 (d, *J* = 7.6 Hz, 1H), 5.10 (d, *J* = 11.8 Hz, 1H), 4.14 – 4.07 (m, 1H), 3.77 (s, 3H), 3.75 – 3.70 (m, 1H), 2.37 (t, *J* = 8.4 Hz, 1H), 2.29 (dd, *J* = 10.4, 5.2 Hz, 1H), 1.66 (dd, *J* = 12.1, 5.5 Hz, 1H), 1.61 – 1.55 (m, 2H), 1.21 (dd, *J* = 12.4, 5.4 Hz, 1H). <sup>13</sup>C NMR (101 MHz, DMSO-*d*<sub>6</sub>) δ: 195.97, 179.54, 163.51, 152.42,

142.32, 139.95, 134.13, 130.85, 130.30, 129.90, 129.65, 129.08, 128.87, 128.52, 127.14, 126.89, 126.47, 125.26, 121.52, 120.86, 118.44, 113.83, 110.09, 73.34, 62.73, 55.92, 47.73, 42.70, 30.03, 27.12. HRMS (ESI, *m/z*): [M+H]<sup>+</sup>calcd. for C<sub>37</sub>H<sub>32</sub>N<sub>4</sub>O<sub>3</sub>: 581.2547; Found: 581.2556.

**(dl)-1'-(1,3-diphenyl-1H-pyrazol-4-yl)-2'-(4-nitrobenzoyl)-1',2',5',6',7',7a'-**

**hexahydrospiroindolin e-3,3'-pyrrolizin]-2-one (4e).** White Solid. mp: 179-180 °C. IR (KBr, cm<sup>-1</sup>):

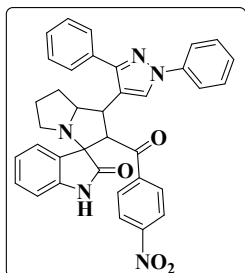

<sup>1</sup>): 3383, 1719, 1661, 1599. <sup>1</sup>H NMR (400 MHz, DMSO-*d*<sub>6</sub>) δ: 10.02 (s, 1H), 9.00 (s, 1H), 8.11 (d, *J* = 8.4 Hz, 2H), 7.90 (s, 4H), 7.64 (t, *J* = 11.6 Hz, 4H), 7.51 (d, *J* = 4.8 Hz, 4H), 7.33 (t, *J* = 13.2 Hz, 1H), 7.16 (s, 1H), 7.02 (s, 1H), 6.48 (d, *J* = 7.2 Hz, 1H), 5.22 (d, *J* = 10.8 Hz, 1H), 4.04 (t, *J* = 10.0 Hz, 1H), 3.76 (d, *J* = 6.4 Hz, 1H), 2.37 (dd, *J* = 15.6, 8.0 Hz, 1H), 2.29 (d, *J* = 5.2 Hz, 1H), 1.67 (dd, *J* = 11.2, 5.2 Hz, 1H), 1.60 (d, *J* = 5.6 Hz, 2H), 1.23 (dd, *J* = 11.2, 6.0 Hz, 1H). <sup>13</sup>C NMR (101 MHz, DMSO-*d*<sub>6</sub>) δ: 198.09, 198.09, 179.18, 179.18, 152.41, 152.41, 150.11, 142.33, 139.98, 134.12, 130.14,

129.93, 129.56, 129.15, 128.88, 128.58, 127.05, 126.80, 126.54, 124.80, 123.54, 121.91, 120.58, 118.47, 110.42, 73.51, 72.95, 64.62, 47.65, 42.20, 30.12, 27.20. HRMS (ESI, *m/z*): [M+H]<sup>+</sup>calcd. for C<sub>36</sub>H<sub>29</sub>N<sub>5</sub>O<sub>4</sub>: 596.2292; Found: 596.2297.

**(dl)-1'-(1,3-diphenyl-1H-pyrazol-4-yl)-2'-(3-nitrobenzoyl)-1',2',5',6',7',7a'-**

**hexahydrospiroindolin e-3,3'-pyrrolizin]-2-one (4f).** White Solid. mp: 179-180 °C. IR (KBr, cm<sup>-1</sup>):

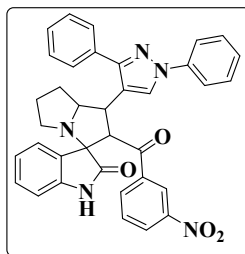

<sup>1</sup>): 3382, 1719, 1669, 1599. <sup>1</sup>H NMR (400 MHz, DMSO-*d*<sub>6</sub>) δ: 10.09 (s, 1H), 9.01 (s, 1H), 8.35 (d, *J* = 8.4 Hz, 1H), 8.08 (s, 1H), 7.90 (d, *J* = 8.4 Hz, 4H), 7.78 (d, *J* = 7.8 Hz, 1H), 7.60 (dt, *J* = 12.4, 7.2 Hz, 3H), 7.53 – 7.47 (m, 3H), 7.29 (t, *J* = 7.2 Hz, 1H), 7.14 – 7.07 (m, 1H), 7.04 – 6.97 (m, 2H), 6.42 (d, *J* = 8.0 Hz, 1H), 5.20 (d, *J* = 11.2 Hz, 1H), 4.11 – 4.00 (m, 1H), 3.77 (dd, *J* = 14.4, 6.8 Hz, 1H), 2.39 (dd, *J* = 11.2, 4.8 Hz, 1H), 2.30 (dd, *J* = 10.0, 5.6 Hz, 1H), 1.66 (dd, *J* = 12.4, 5.6 Hz, 1H), 1.62 – 1.53 (m, 2H), 1.23 (dd, *J* = 12.4, 5.6 Hz, 1H). <sup>13</sup>C NMR (101 MHz, DMSO-*d*<sub>6</sub>) δ: 197.32, 179.29, 152.42,

147.75, 142.36, 140.00, 138.53, 134.28, 134.17, 130.33, 130.05, 129.92, 129.13, 128.90, 128.56, 127.66, 127.14, 126.76, 126.52, 124.85, 122.81, 121.88, 120.52, 118.50, 110.21, 73.37, 72.87, 64.39, 47.75, 42.28, 29.94, 27.04. HRMS (ESI, *m/z*): [M+H]<sup>+</sup>calcd. for C<sub>36</sub>H<sub>29</sub>N<sub>5</sub>O<sub>4</sub>: 596.2292; Found: 596.2290.

**(dl)-1'-(1,3-diphenyl-1H-pyrazol-4-yl)-2'-(furan-2-carbonyl)-1',2',5',6',7',7a'-hexahydrospiro[indo line-3,3'-pyrrolizin]-2-one (4g).** White Solid. mp: 179-180 °C. IR (KBr, cm<sup>-1</sup>): 3214, 1719, 1669, 1598. <sup>1</sup>H NMR (400 MHz, DMSO-*d*<sub>6</sub>) δ: 10.36 (s, 1H), 8.85 (s, 1H), 7.86 (dd, *J* = 11.6, 8.0 Hz, 4H), 7.80 (s, 1H), 7.59 (t, *J* = 7.6 Hz, 2H), 7.51 (dd, *J* = 13.6, 7.6 Hz, 3H), 7.29 (dd, *J* = 15.2, 7.2 Hz, 2H), 7.15 (t, *J* = 7.6 Hz, 1H), 7.08 (d, *J* = 7.2 Hz, 1H), 6.97 (t, *J* = 7.2 Hz, 1H), 6.68 (d, *J* = 7.6 Hz, 1H), 6.62 (s, 1H), 4.78 (d, *J* = 12.0 Hz, 1H), 4.08 (t, *J* = 11.2 Hz, 1H), 3.78 (dd, *J* = 16.4, 7.6 Hz, 1H), 2.45 (dd, *J* = 12.0, 7.6 Hz, 1H), 2.35 (dd, *J* = 12.0, 5.6 Hz, 1H), 1.74 (dd, 11.6, 5.2 Hz, 1H), 1.65 – 1.55

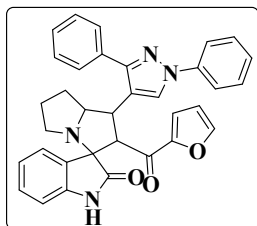

(m, 2H), 1.24 (dd, 12.0, 6.4 Hz, 1H). <sup>13</sup>C NMR (101 MHz, DMSO-*d*<sub>6</sub>) δ: 184.07, 179.64, 152.41, 152.07, 148.98, 142.31, 139.90, 133.93, 129.93, 129.80, 129.06, 128.84, 128.55, 128.19, 127.29, 127.01, 126.57, 125.13, 121.65, 120.68, 120.43, 118.50, 112.85, 110.31, 73.60, 73.18, 63.32, 47.65, 42.29, 29.93, 27.10. HRMS (ESI, m/z): [M+H]<sup>+</sup>calcd. for C<sub>34</sub>H<sub>28</sub>N<sub>4</sub>O<sub>3</sub>: 541.2234; Found: 541.2232.

**(dl)-1'-(1,3-diphenyl-1H-pyrazol-4-yl)-2'-(thiophene-2-carbonyl)-1',2',5',6',7',7a'-hexahydrospiro[indoline-3,3'-pyrrolizin]-2-one (4h).** White Solid. mp: 179-180 °C. IR (KBr, cm<sup>-1</sup>): 3203, 1719, 1657, 1598. <sup>1</sup>H NMR (400 MHz, DMSO-*d*<sub>6</sub>) δ: 10.30 (s, 1H), 8.90 (s, 1H), 7.86 (dd, *J* = 13.6, 7.2 Hz, 4H), 7.81 (d, *J* = 3.6 Hz, 1H), 7.59 (t, *J* = 7.6 Hz, 2H), 7.49 (dd, *J* = 15.2, 8.0 Hz, 4H), 7.28 (t, *J* = 7.6 Hz, 1H), 7.13 (dd, *J* = 8.8, 5.2 Hz, 2H), 7.08 (d, *J* = 7.2 Hz, 1H), 6.98 (t, *J* = 7.6 Hz, 1H), 6.61 (d, *J* = 7.6 Hz, 1H), 4.98 (d, *J* = 12.0 Hz, 1H), 4.16 (t, *J* = 11.6 Hz, 1H), 3.77 (dd, *J* = 16.0, 6.4 Hz, 1H), 2.41 (dd, *J* = 16.4, 6.8 Hz, 1H), 2.32 (dd, *J* = 10.4, 5.2 Hz, 1H), 1.68 (dd, *J* = 12.0, 5.4 Hz, 1H), 1.60 (dd, *J* = 13.6, 6.4 Hz, 2H), 1.22 (dd, *J* = 12.0, 6.4 Hz, 1H). <sup>13</sup>C NMR

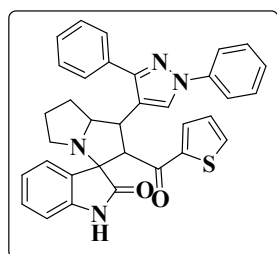

(101 MHz, DMSO-*d*<sub>6</sub>) δ: 189.54, 179.69, 152.43, 144.14, 142.22, 139.89, 136.29, 134.37, 133.95, 129.93, 129.79, 129.09, 128.84, 128.57, 127.24, 127.01, 126.56, 125.13, 121.74, 120.41, 118.47, 110.26, 79.62, 73.74, 73.30, 63.89, 47.75, 42.62, 29.97, 27.11. HRMS (ESI, m/z): [M+H]<sup>+</sup>calcd. for C<sub>34</sub>H<sub>28</sub>N<sub>4</sub>O<sub>2</sub>S: 557.2006; Found: 557.2010.

**(dl)-2'-benzoyl-1'-(1,3-diphenyl-1H-pyrazol-4-yl)-1-methyl-1',2',5',6',7',7a'-hexahydrospiro[indo line-3,3'-pyrrolizin]-2-one (4i).** White Solid. mp: 179-180 °C. IR (KBr, cm<sup>-1</sup>): 1713, 1682, 1599. <sup>1</sup>H NMR (400 MHz, DMSO-*d*<sub>6</sub>) δ: 8.97 (s, 1H), 7.93 – 7.90 (m, 4H), 7.69 (d, *J* = 7.6 Hz, 1H), 7.62 (t, *J* = 8.0 Hz, 2H), 7.51 (t, *J* = 8.0 Hz, 4H), 7.27 (dd, *J* = 5.6, 2.8 Hz, 4H), 7.21 (dd, *J* = 8.0, 2.8 Hz, 1H), 7.05 (dd, *J* = 9.6, 7.6 Hz, 2H), 6.60 (d, *J* = 8.0 Hz, 1H), 5.14 (d, *J* = 11.6 Hz, 1H), 4.08 (t, 1H), 3.80 – 3.73 (m, 1H), 2.59 (s, 3H), 2.38 (dd, *J* = 16.8, 7.2 Hz, 1H), 2.27 (dd, *J* = 11.6, 6.0 Hz, 1H), 1.65 (dd, *J* = 12.4, 5.6 Hz, 1H) 1.63

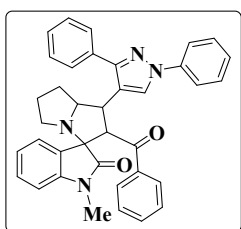

(dd, *J* = 15.2, 7.2 Hz, 2H), 1.24 (dd, *J* = 12.4, 6.8 Hz, 1H). <sup>13</sup>C NMR (101 MHz, DMSO-*d*<sub>6</sub>) δ: 198.26, 177.67, 152.40, 143.56, 140.00, 137.43, 134.22, 133.22, 129.90, 129.11, 128.91, 128.52, 128.29, 128.05, 126.94, 126.47, 126.35, 124.50, 122.33, 120.79, 118.46, 108.98, 73.55, 72.95, 64.52, 47.79, 42.11, 30.17, 27.29, 26.14. HRMS (ESI, m/z): [M+H]<sup>+</sup>calcd. for C<sub>37</sub>H<sub>32</sub>N<sub>4</sub>O<sub>2</sub>: 565.2598; Found: 565.2605.

**(dl)-2'-(4-chlorobenzoyl)-1'-(1,3-diphenyl-1H-pyrazol-4-yl)-1-methyl-1',2',5',6',7',7a'-hexahydro spiro[indoline-3,3'-pyrrolizin]-2-one (4j).** White Solid. mp: 179-180 °C. IR (KBr, cm<sup>-1</sup>): 1714, 1682, 1599. <sup>1</sup>H NMR (400 MHz, DMSO-*d*<sub>6</sub>) δ: 8.96 (s, 1H), 7.89 (d, *J* = 7.6 Hz, 4H), 7.61 (t, *J* = 7.6 Hz, 2H), 7.50 (dd, *J* = 16.0, 8.4 Hz, 3H), 7.37 (d, *J* = 8.8 Hz, 2H), 7.29 (t, *J* = 8.8 Hz, 3H), 7.23 (dd, *J* = 7.6, 4.0 Hz, 1H), 7.09 – 7.02 (m, 2H), 6.67 (d, *J* = 7.6 Hz, 1H), 5.12 (d, *J* = 11.6 Hz, 1H), 4.03 (t, *J* = 11.6, Hz, 1H), 3.76 (dd, *J* = 16.0, 6.4 Hz, 1H), 2.66 (s, 3H), 2.37 (dd, *J* = 13.2, 6.4 Hz, 1H), 2.27 (dd, *J* = 15.2, 5.6 Hz, 1H) 1.72 – 1.54 (m, 3H), 1.23 (dd, *J* = 11.6, 6.4 Hz, 1H). <sup>13</sup>C NMR (101 MHz, DMSO-*d*<sub>6</sub>) δ: 197.27, 177.61, 152.38, 143.48, 139.98, 138.28, 136.03, 134.17, 130.10, 129.91, 129.12, 128.88, 128.54, 128.44, 127.02, 126.51, 126.37, 124.36, 122.46, 120.62, 118.46, 109.11, 73.53, 72.88, 64.56, 47.78, 42.06, 30.14, 27.27, 26.20. HRMS (ESI, *m/z*): [M+H]<sup>+</sup> calcd. for C<sub>37</sub>H<sub>31</sub>ClN<sub>4</sub>O<sub>2</sub>: 599.2208; Found: 599.2221.

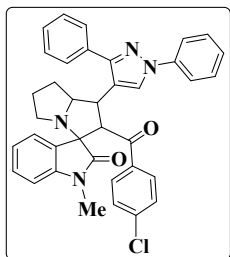

**(dl)-1'-(1,3-diphenyl-1H-pyrazol-4-yl)-2'-(4-methoxybenzoyl)-1-methyl-1',2',5',6',7',7a'-hexahydro spiro[indoline-3,3'-pyrrolizin]-2-one (4k).** White Solid. mp: 179-180 °C. IR (KBr, cm<sup>-1</sup>): 1712, 1671, 1599. <sup>1</sup>H NMR (400 MHz, DMSO-*d*<sub>6</sub>) δ: 8.93 (s, 1H), 7.91 (t, *J* = 8.0 Hz, 4H), 7.61 (t, *J* = 7.6 Hz, 2H), 7.52 – 7.46 (m, 3H), 7.34 (d, *J* = 8.8 Hz, 2H), 7.29 (d, *J* = 7.6 Hz, 1H), 7.20 (dd, *J* = 7.6, 4.0 Hz, 1H), 7.05 (d, *J* = 4.4 Hz, 2H), 6.80 (d, *J* = 8.8 Hz, 2H), 6.65 (d, *J* = 7.6 Hz, 1H), 5.07 (d, *J* = 11.2 Hz, 1H), 4.10 – 4.00 (m, 1H), 3.77 (s, 3H), 3.64 – 3.50 (m, 1H), 2.70 (s, 3H), 2.39 (dd, *J* = 15.2, 8.0 Hz, 1H), 2.27 (dd, *J* = 15.4, 5.6 Hz, 1H), 1.67 (dd, *J* = 12.0, 5.2 Hz, 1H), 1.60 (dd, *J* = 14.0, 8.8 Hz, 2H), 1.23 (dd, *J* = 11.2, 6.4 Hz, 1H). <sup>13</sup>C NMR (101 MHz, DMSO-*d*<sub>6</sub>) δ: 195.98, 177.91, 163.39, 152.40, 143.51, 139.98, 134.21, 130.53, 130.20, 129.99, 129.89, 129.82, 129.08, 128.90, 128.50, 128.19, 126.93, 126.46, 124.61, 122.25, 120.84, 118.85, 118.44, 113.58, 108.93, 73.48, 73.16, 63.95, 55.98, 47.82, 42.26, 30.13, 27.27, 26.33. HRMS (ESI, *m/z*): [M+H]<sup>+</sup> calcd. for C<sub>38</sub>H<sub>34</sub>N<sub>4</sub>O<sub>3</sub>: 595.2704; Found: 595.2720.

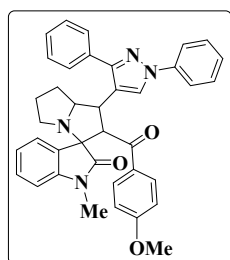

**(dl)-1'-(1,3-diphenyl-1H-pyrazol-4-yl)-1-methyl-2'-(4-nitrobenzoyl)-1',2',5',6',7',7a'-hexahydro spiro[indoline-3,3'-pyrrolizin]-2-one (4l).** White Solid. mp: 179-180 °C. IR (KBr, cm<sup>-1</sup>): 1715, 1610, 1531. <sup>1</sup>H NMR (400 MHz, DMSO-*d*<sub>6</sub>) δ: 9.00 (s, 1H), 8.32 (d, *J* = 8.0 Hz, 1H), 7.90 (dd, *J* = 8.8, 3.2 Hz, 5H), 7.71 (d, *J* = 7.6 Hz, 1H), 7.61 (q, *J* = 8.0 Hz, 3H), 7.53-7.48 (m, 3H), 7.30 (t, *J* = 7.6 Hz, 1H), 7.22 (t, *J* = 7.6 Hz, 1H), 7.12 – 7.03 (m, 2H), 6.59 (d, *J* = 7.8 Hz, 1H), 5.21 (d, *J* = 11.6 Hz, 1H), 4.04 (t, *J* = 11.2 Hz, 1H), 3.78 (dd, *J* = 16.0, 6.4 Hz, 1H), 2.60 (s, 3H), 2.39 (dd, *J* = 16.4, 6.8 Hz, 1H), 2.27 (dd, *J* = 15.2, 5.6 Hz, 1H), 1.67 (dd, *J* = 12.4, 5.6 Hz, 1H), 1.60 (dd, *J* = 13.2, 6.4 Hz, 2H), 1.24 (dd, *J* = 12.0, 5.6 Hz, 1H). <sup>13</sup>C NMR (101 MHz, CDCl<sub>3</sub>) δ: 195.68, 178.51, 153.06, 147.91, 143.28, 139.92, 138.46, 133.64, 133.20, 129.88, 129.38, 129.12, 129.08, 128.61, 128.17, 126.97, 126.69, 126.37, 125.28, 124.27, 122.68, 122.66, 120.34, 118.92, 108.19, 73.41, 72.90, 65.56, 48.39, 42.52, 29.71, 26.62, 26.16. HRMS (ESI, *m/z*): [M+H]<sup>+</sup> calcd. for C<sub>37</sub>H<sub>31</sub>N<sub>5</sub>O<sub>4</sub>: 610.2449; Found: 610.2455.

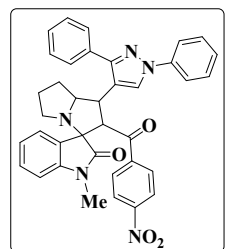

**(dl)-1'-(1,3-diphenyl-1H-pyrazol-4-yl)-1-methyl-2'-(thiophene-2-carbonyl)-1',2',5',6',7',7a'-hexahydrospiro[indoline-3,3'-pyrrolizin]-2-one (4m).** White Solid. mp: 179-180 °C. IR (KBr, cm<sup>-1</sup>): 1712, 1655, 1599. <sup>1</sup>H NMR (400 MHz, DMSO-*d*<sub>6</sub>) δ: 8.91 (s, 1H), 7.88 (d, *J* = 8.4 Hz, 4H), 7.82 (d, *J* = 4.4 Hz, 1H), 7.65 (d, *J* = 3.2 Hz, 1H), 7.60 (t, *J* = 8.0 Hz, 2H), 7.49 (dd, *J* = 14.8, 7.2 Hz, 4H), 7.29 (d, *J* = 7.2 Hz, 1H), 7.13 (t, *J* = 4.8 Hz, 1H), 7.08 (t, *J* = 5.6 Hz, 2H), 6.75 (d, *J* = 7.8 Hz, 1H), 4.98 (d, *J* = 12.0 Hz, 1H), 4.10 (t, *J* = 12.0 Hz, 1H), 3.79 (dd, *J* = 16.4, 6.4 Hz, 1H), 2.84 (s, 3H), 2.42 (dd, *J* = 13.6, 6.8 Hz, 1H), 2.31 (dd, *J* = 11.2, 6.0 Hz, 1H), 1.71 – 1.58 (m, 3H), 1.24 (dd, *J* = 12.4, 6.8 Hz, 1H). <sup>13</sup>C NMR (101 MHz, DMSO-*d*<sub>6</sub>) δ: 189.32, 178.03, 152.42, 143.72, 143.45, 139.91, 136.09, 134.01, 133.87, 129.92, 129.09, 128.86, 128.56, 128.45, 127.04, 126.63, 126.54, 124.46, 122.49, 120.33, 118.47, 109.08, 79.62, 73.64, 73.42, 64.88, 47.85, 42.20, 30.08, 27.27, 26.40. HRMS (ESI, m/z): [M+H]<sup>+</sup>calcd. For C<sub>35</sub>H<sub>30</sub>N<sub>4</sub>O<sub>2</sub>S: 571.2162; Found: 571.2173.

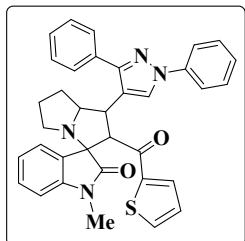

HRMS (ESI, m/z): [M+H]<sup>+</sup>calcd. For C<sub>35</sub>H<sub>30</sub>N<sub>4</sub>O<sub>2</sub>S: 571.2162; Found: 571.2173.

**(dl)-1-benzyl-1'-(1,3-diphenyl-1H-pyrazol-4-yl)-2'-(4-methoxybenzoyl)-1',2',5',6',7',7a'-hexahydro spiroindoline-3,3'-pyrrolizin]-2-one (4n).** White Solid. mp: 179-180 °C. IR (KBr, cm<sup>-1</sup>): 1714, 1668, 1600. <sup>1</sup>H NMR (400 MHz, DMSO-*d*<sub>6</sub>) δ: 8.98 (s, 1H), 7.91 (t, *J* = 7.6 Hz, 4H), 7.61 (t, *J* = 7.6 Hz, 2H), 7.54 – 7.46 (m, 6H), 7.27 (t, *J* = 7.2 Hz, 1H), 7.18 (d, *J* = 6.4 Hz, 2H), 7.12 (t, *J* = 9.6 Hz, 2H), 7.03 (t, *J* = 7.6 Hz, 1H), 6.95 (d, *J* = 7.2 Hz, 2H), 6.83 (d, *J* = 8.8 Hz, 2H), 6.55 (d, *J* = 7.6 Hz, 1H), 5.24 (d, *J* = 11.6 Hz, 1H), 4.71 (d, *J* = 16.0 Hz, 1H), 4.45 (d, *J* = 16.0 Hz, 1H), 4.17 (t, *J* = 10.8 Hz, 1H), 3.83 (t, *J* = 9.2 Hz, 1H), 3.79 (s, 3H), 2.37 – 2.27 (m, 2H), 1.69 (dd, *J* = 11.6, 5.6 Hz, 1H), 1.64 – 1.56 (m, 2H), 1.23 (dd, *J* = 11.6, 6.4 Hz, 1H). <sup>13</sup>C NMR (101 MHz, DMSO-*d*<sub>6</sub>) δ: 195.61, 178.08, 163.75, 152.44, 142.73, 139.96, 136.33, 134.11, 130.92, 130.07, 129.91, 129.74, 129.10, 128.94, 128.89, 128.54, 127.65, 127.16, 127.00, 126.50, 124.74, 122.39, 120.68, 118.46, 113.97, 109.70, 73.33, 72.98, 62.56, 56.00, 47.61, 43.18, 42.85, 30.10, 27.27. HRMS (ESI, m/z): [M+H]<sup>+</sup> calcd. for C<sub>44</sub>H<sub>38</sub>N<sub>4</sub>O<sub>3</sub>: 671.3017; Found: 671.3022.

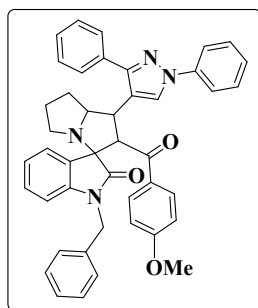

HRMS (ESI, m/z): [M+H]<sup>+</sup> calcd. for C<sub>44</sub>H<sub>38</sub>N<sub>4</sub>O<sub>3</sub>: 671.3017; Found: 671.3022.

**(dl)-1-butyl-2'-(4-chlorobenzoyl)-1'-(1,3-diphenyl-1H-pyrazol-4-yl)-1',2',5',6',7',7a'-hexahydro spiroindoline-3,3'-pyrrolizin]-2-one (4o).** White Solid. mp: 179-180 °C. IR (KBr, cm<sup>-1</sup>): 1710, 1681, 1600. <sup>1</sup>H NMR (400 MHz, DMSO-*d*<sub>6</sub>) δ: 8.99 (s, 1H), 7.89 (t, *J* = 6.8 Hz, 4H), 7.62 (t, *J* = 8.0 Hz, 2H), 7.50 (dd, *J* = 16.0, 8.8 Hz, 4H), 7.37 (d, *J* = 1.2 Hz, 3H), 7.28 (t, *J* = 7.6 Hz, 1H), 7.24 (dd, *J* = 8.8, 4.0 Hz, 1H), 7.07 (d, *J* = 4.0 Hz, 2H), 6.75 (d, *J* = 8.0 Hz, 1H), 5.20 (d, *J* = 12.0 Hz, 1H), 4.08 (t, *J* = 11.2 Hz, 1H), 3.76 (dd, *J* = 16.0, 6.4 Hz, 1H), 3.22 (dd, *J* = 13.6, 7.6 Hz, 1H), 2.28 (dd, *J* = 13.6, 6.4 Hz, 2H), 1.67 (dd, *J* = 12.0, 5.6 Hz, 1H), 1.59 (t, *J* = 6.8 Hz, 2H), 1.25-1.19 (m, 2H), 1.07 (dd, *J* = 16.0, 6.4 Hz, 3H), 0.92 (dd, *J* = 13.6, 6.4 Hz, 1H), 0.81 (t, *J* = 6.8 Hz, 3H). <sup>13</sup>C NMR (101 MHz, DMSO-*d*<sub>6</sub>) δ: 197.25, 177.27, 152.41, 142.99, 139.95, 138.58, 136.13, 134.10, 130.10, 129.92, 129.13, 128.88, 128.73, 128.57, 127.03, 126.77, 126.53, 124.45, 122.23, 120.49, 118.45, 109.29, 73.41, 72.65, 63.52, 47.56, 42.39, 30.16, 28.99, 27.30, 19.84, 14.12. HRMS (ESI, m/z): [M+H]<sup>+</sup>calcd. for C<sub>40</sub>H<sub>37</sub>ClN<sub>4</sub>O<sub>2</sub>: 641.2678; Found: 641. 2693.

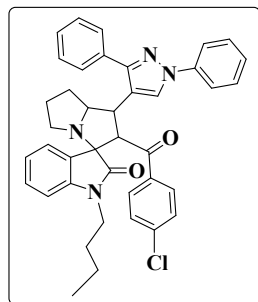

HRMS (ESI, m/z): [M+H]<sup>+</sup>calcd. for C<sub>40</sub>H<sub>37</sub>ClN<sub>4</sub>O<sub>2</sub>: 641.2678; Found: 641. 2693.

**(dl)-2'-(4-bromobenzoyl)-1'-(1,3-diphenyl-1H-pyrazol-4-yl)-1-(prop-2-yn-1-yl)-1',2',5',6',7',7a'-hexahydrospiro[indoline-3,3'-pyrrolizin]-2-one (4p).** White Solid. mp: 179-180 °C. IR (KBr, cm<sup>-1</sup>): 1721, 1680, 1599. <sup>1</sup>H NMR (400 MHz, DMSO-*d*<sub>6</sub>) δ: 8.96 (s, 1H), 7.89 (d, *J* = 8.0 Hz, 4H), 7.60 (t, *J* = 8.0 Hz, 2H), 7.48 (d, *J* = 8.4 Hz, 5H), 7.28 (d, *J* = 8.4 Hz, 4H), 7.09 (d, *J* = 6.4 Hz, 2H), 6.82 (d, *J* = 7.6 Hz, 1H), 5.16 (d, *J* = 12.0 Hz, 1H), 4.29 (dd, *J* = 17.6, 2.4 Hz, 1H), 4.10 – 3.99 (m, 3H), 3.79 (dd, *J* = 16.0, 6.4 Hz, 1H), 2.37 (d, *J* = 6.4 Hz, 1H), 2.27 (dd, *J* = 10.8, 5.6 Hz, 1H), 1.68 (dd, *J* = 12.4, 5.6 Hz, 1H), 1.60 (dd, *J* = 12.0, 6.4 Hz, 2H), 1.24 (dd, *J* = 12.4, 5.6 Hz, 1H). <sup>13</sup>C NMR (101 MHz, CDCl<sub>3</sub>) δ: 196.13, 177.81, 153.10, 141.40, 139.93, 135.76, 133.73, 131.65, 129.58, 129.37, 129.31, 129.11, 128.60, 128.13, 127.09, 126.34, 125.06, 124.28, 122.82, 120.28, 118.95, 109.37, 73.47, 73.05, 72.33, 64.22, 48.24, 42.62, 30.04, 29.71, 29.37, 26.88. HRMS (ESI, *m/z*): [M+H]<sup>+</sup> calcd. for C<sub>39</sub>H<sub>31</sub>BrN<sub>4</sub>O<sub>2</sub>: 667.1703; Found: 667.1718.

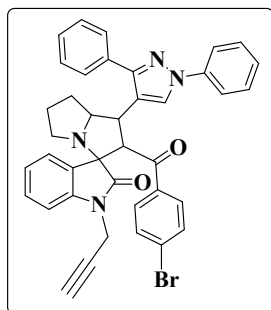

**(dl)-1'-(1,3-diphenyl-1H-pyrazol-4-yl)-5-fluoro-2'-(4-fluorobenzoyl)-1',2',5',6',7',7a'-hexahydrospiro[indoline-3,3'-pyrrolizin]-2-one (4q).** White Solid. mp: 179-180 °C. IR (KBr, cm<sup>-1</sup>): 3210, 1723, 1681, 1598. <sup>1</sup>H NMR (400 MHz, DMSO-*d*<sub>6</sub>) δ: 10.18 (s, 1H), 8.97 (s, 1H), 7.88 (dd, *J* = 7.6, 5.6 Hz, 4H), 7.60 (t, *J* = 7.6 Hz, 4H), 7.50 (dd, *J* = 15.2, 7.6 Hz, 3H), 7.29 (t, *J* = 7.6 Hz, 1H), 7.16 (t, *J* = 8.8 Hz, 2H), 7.00 (t, *J* = 8.4 Hz, 1H), 6.80 (d, *J* = 8.0 Hz, 1H), 6.53 (dd, *J* = 8.4, 4.4 Hz, 1H), 5.17 (d, *J* = 12.0 Hz, 1H), 4.01 (t, *J* = 11.2 Hz, 1H), 3.83 – 3.70 (m, 1H), 2.42 – 2.36 (m, 1H), 2.34 (d, *J* = 4.8 Hz, 1H), 1.87 – 1.67 (m, 1H), 1.64 (dd, *J* = 12.0, 5.6 Hz, 2H), 1.24 (dd, *J* = 11.2, 6.4 Hz, 1H). <sup>13</sup>C NMR (101 MHz, DMSO-*d*<sub>6</sub>) δ: 196.67, 179.22, 166.75, 164.24, 158.92, 156.56, 152.43, 139.94, 138.59, 134.05, 133.94, 131.46, 131.37, 129.93, 129.07, 128.90, 128.61, 127.09, 126.54, 120.36, 118.45, 116.56, 116.33, 115.86, 115.64, 114.50, 114.25, 111.07, 110.99, 73.45, 73.33, 63.53, 47.57, 42.42, 30.10, 27.44. HRMS (ESI, *m/z*): [M+H]<sup>+</sup> calcd. for C<sub>36</sub>H<sub>28</sub>F<sub>2</sub>N<sub>4</sub>O<sub>2</sub>: 587.2253; Found: 587.2266.

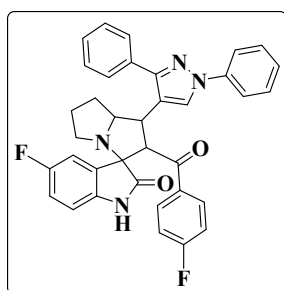

**(dl)-2'-(4-chlorobenzoyl)-1'-(1,3-diphenyl-1H-pyrazol-4-yl)-5-fluoro-1',2',5',6',7',7a'-hexahydrospiro[indoline-3,3'-pyrrolizin]-2-one (4r).** White Solid. mp: 179-180 °C. IR (KBr, cm<sup>-1</sup>): 3210, 1722, 1681, 1597. <sup>1</sup>H NMR (400 MHz, DMSO-*d*<sub>6</sub>) δ: 10.23 (s, 1H), 8.98 (s, 1H), 8.11 (d, *J* = 8.4 Hz, 1H), 7.95 (t, *J* = 7.6 Hz, 1H), 7.87 (d, *J* = 7.6 Hz, 3H), 7.68 (dd, *J* = 8.4, 4.4 Hz, 1H), 7.59 (d, *J* = 7.6 Hz, 2H), 7.51 (dd, *J* = 8.4, 6.4 Hz, 3H), 7.40 (d, *J* = 8.4 Hz, 2H), 7.29 (t, *J* = 7.6 Hz, 1H), 7.02 (t, *J* = 7.8 Hz, 1H), 6.81 (d, *J* = 7.8 Hz, 1H), 6.55 (dd, *J* = 8.4, 4.4 Hz, 1H), 5.17 (d, *J* = 11.2 Hz, 1H), 4.02 (t, *J* = 10.4 Hz, 1H), 3.80 (d, *J* = 8.0 Hz, 1H), 2.41 (d, *J* = 7.6 Hz, 1H), 2.35 (d, *J* = 6.4 Hz, 1H), 1.79 – 1.68 (m, 1H), 1.65 (dd, *J* = 12.0, 6.4 Hz, 2H), 1.26 (dd, *J* = 11.2, 6.4 Hz, 1H). <sup>13</sup>C NMR (101 MHz, DMSO-*d*<sub>6</sub>) δ: 197.12, 188.08, 179.05, 158.94, 156.58, 152.42, 139.94, 138.78, 136.80, 135.86, 135.21, 134.03, 130.60, 130.24, 129.93, 129.43, 129.40, 129.08, 128.94, 128.90, 128.83, 128.62, 127.12, 126.55, 121.53, 120.25, 119.21, 118.46, 118.24, 116.67, 116.44, 114.52, 114.27, 111.15, 111.07, 73.41, 73.35, 63.54, 47.63, 42.35, 30.07, 27.42. HRMS (ESI, *m/z*): [M+H]<sup>+</sup> calcd. for C<sub>36</sub>H<sub>28</sub>ClFN<sub>4</sub>O<sub>2</sub>: 603.1958; Found: 603.1968.

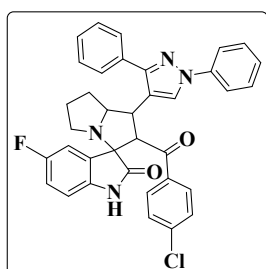

**(dl)-2'-(4-bromobenzoyl)-1'-(1,3-diphenyl-1H-pyrazol-4-yl)-5-fluoro-1',2',5',6',7',7a'-hexahydrospiro[indoline-3,3'-pyrrolizin]-2-one (4s).** White Solid. mp: 179-180 °C. IR (KBr, cm<sup>-1</sup>): 3213, 1719, 1682, 1598. <sup>1</sup>H NMR (400 MHz, DMSO-*d*<sub>6</sub>) δ: 10.20 (s, 1H), 8.97 (s, 1H), 8.03 (d, *J* = 8.8 Hz, 1H), 7.96 (d, *J* = 7.6 Hz, 1H), 7.87 (t, *J* = 7.6 Hz, 3H), 7.59 (d, *J* = 7.6 Hz, 2H), 7.56 – 7.51 (m, 4H), 7.43 (d, *J* = 8.4 Hz, 2H), 7.29 (t, *J* = 7.6 Hz, 1H), 7.01 (t, *J* = 10.4 Hz, 1H), 6.80 (d, *J* = 8.4 Hz, 1H), 6.54 (dd, *J* = 8.8, 4.4 Hz, 1H), 5.16 (d, *J* = 11.6 Hz, 1H), 4.04 – 3.97 (m, 1H), 3.77 (dd, *J* = 14.8, 7.6 Hz, 1H), 2.39 (dd, *J* = 10.4, 7.6 Hz, 1H), 2.33 (dd, *J* = 10.4, 5.2 Hz, 1H), 1.69 (dd, *J* = 11.6, 5.2 Hz, 1H), 1.66 – 1.60 (m, 2H), 1.24 (dd, *J* = 11.6, 6.2 Hz, 1H). <sup>13</sup>C NMR (101 MHz, DMSO-*d*<sub>6</sub>) δ: 197.35, 188.34, 179.22, 158.95, 156.58, 153.59, 153.57, 152.44, 139.92, 138.56, 136.17, 134.02, 132.37, 131.77, 130.70, 130.31, 130.24, 129.93, 129.40, 129.07, 128.94, 128.90, 128.63, 128.02, 127.07, 126.77, 126.70, 126.57, 120.31, 119.23, 118.47, 116.62, 116.38, 114.47, 114.22, 111.14, 111.07, 105.53, 73.43, 73.31, 63.56, 47.53, 42.40, 30.11, 27.44. HRMS (ESI, m/z): [M+H]<sup>+</sup> calcd. for C<sub>36</sub>H<sub>28</sub>BrFN<sub>4</sub>O<sub>2</sub>: 647.1452; Found: 647.1458.

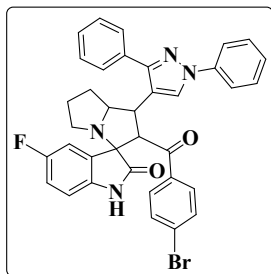

(101 MHz, DMSO-*d*<sub>6</sub>) δ: 197.35, 188.34, 179.22, 158.95, 156.58, 153.59, 153.57, 152.44, 139.92, 138.56, 136.17, 134.02, 132.37, 131.77, 130.70, 130.31, 130.24, 129.93, 129.40, 129.07, 128.94, 128.90, 128.63, 128.02, 127.07, 126.77, 126.70, 126.57, 120.31, 119.23, 118.47, 116.62, 116.38, 114.47, 114.22, 111.14, 111.07, 105.53, 73.43, 73.31, 63.56, 47.53, 42.40, 30.11, 27.44. HRMS (ESI, m/z): [M+H]<sup>+</sup> calcd. for C<sub>36</sub>H<sub>28</sub>BrFN<sub>4</sub>O<sub>2</sub>: 647.1452; Found: 647.1458.

**(dl)-1'-(1,3-diphenyl-1H-pyrazol-4-yl)-5-fluoro-2'-(4-methoxybenzoyl)-1',2',5',6',7',7a'-hexahydro spiro[indoline-3,3'-pyrrolizin]-2-one (4t).** White Solid. mp: 179-180 °C. IR (KBr, cm<sup>-1</sup>): 3209, 1722, 1669, 1599. <sup>1</sup>H NMR (400 MHz, DMSO-*d*<sub>6</sub>) δ: 10.19 (s, 1H), 8.94 (s, 1H), 7.89 (d, *J* = 7.6 Hz, 4H), 7.59 (t, *J* = 8.8 Hz, 4H), 7.49 (dd, *J* = 15.6, 8.0 Hz, 3H), 7.28 (t, *J* = 7.2 Hz, 1H), 6.99 (t, *J* = 10.8 Hz, 1H), 6.83 (t, *J* = 9.2 Hz, 3H), 6.55 (dd, *J* = 8.4, 4.4 Hz, 1H), 5.13 (d, *J* = 11.6 Hz, 1H), 4.04 (t, *J* = 11.2 Hz, 1H), 3.88 (s, 1H), 3.78 (s, 3H), 2.40 (dd, *J* = 10.8, 7.6 Hz, 1H), 2.34 (dd, *J* = 10.4, 5.2 Hz, 1H), 1.73 – 1.67 (m, 1H), 1.63 (dd, *J* = 12.4, 6.2 Hz, 2H), 1.23 (dd, *J* = 11.6, 6.2 Hz, 1H). <sup>13</sup>C NMR (101 MHz, DMSO-*d*<sub>6</sub>) δ: 195.77, 179.38, 163.71, 158.84, 156.49, 152.45, 139.94, 138.59, 134.06, 130.94, 130.11, 129.91, 129.03, 128.90, 128.59, 127.00, 126.51, 120.49, 118.45, 116.33, 116.09, 114.68, 114.44, 113.96, 110.93, 110.85, 73.67, 73.27, 62.78, 55.96, 47.57, 42.72, 30.11, 27.43. HRMS (ESI, m/z): [M+H]<sup>+</sup> calcd. for C<sub>37</sub>H<sub>31</sub>FN<sub>4</sub>O<sub>3</sub>: 599.2453; Found: 599.2464.

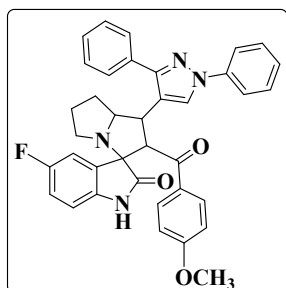

(101 MHz, DMSO-*d*<sub>6</sub>) δ: 195.77, 179.38, 163.71, 158.84, 156.49, 152.45, 139.94, 138.59, 134.06, 130.94, 130.11, 129.91, 129.03, 128.90, 128.59, 127.00, 126.51, 120.49, 118.45, 116.33, 116.09, 114.68, 114.44, 113.96, 110.93, 110.85, 73.67, 73.27, 62.78, 55.96, 47.57, 42.72, 30.11, 27.43. HRMS (ESI, m/z): [M+H]<sup>+</sup> calcd. for C<sub>37</sub>H<sub>31</sub>FN<sub>4</sub>O<sub>3</sub>: 599.2453; Found: 599.2464.

**(dl)-1'-(1,3-diphenyl-1H-pyrazol-4-yl)-5-fluoro-2'-(4-nitrobenzoyl)-1',2',5',6',7',7a'-hexahydrospiro[indoline-3,3'-pyrrolizin]-2-one (4u).** White Solid. mp: 179-180 °C. IR (KBr, cm<sup>-1</sup>): 3124, 1736, 1693, 1599. <sup>1</sup>H NMR (400 MHz, DMSO-*d*<sub>6</sub>) δ: 10.09 (s, 1H), 9.01 (s, 1H), 8.14 (d, *J* = 8.4 Hz, 2H), 7.89 (t, *J* = 8.4 Hz, 4H), 7.66 (d, *J* = 8.8 Hz, 2H), 7.60 (t, *J* = 7.6 Hz, 2H), 7.51 (dd, *J* = 15.6, 8.0 Hz, 3H), 7.30 (t, *J* = 7.6 Hz, 1H), 7.04 (t, *J* = 9.2 Hz, 1H), 6.82 (d, *J* = 10.0 Hz, 1H), 6.50 (dd, *J* = 8.4, 4.4 Hz, 1H), 5.25 (d, *J* = 11.6 Hz, 1H), 3.99 (t, *J* = 11.2 Hz, 1H), 3.79 (dd, *J* = 16.0, 9.2 Hz, 1H), 2.37 (dd, *J* = 12.4, 6.2 Hz, 2H), 1.65 (dd, *J* = 13.2, 6.2 Hz, 3H), 1.26 (dd, *J* = 11.2, 6.4 Hz, 1H). <sup>13</sup>C NMR (101 MHz, DMSO-*d*<sub>6</sub>) δ: 197.87, 179.04, 159.05, 156.69, 152.43, 150.27, 142.00, 139.95, 138.60, 138.58, 134.04, 132.25, 130.25, 130.01, 129.94, 129.70, 129.42, 127.16, 126.57, 124.42, 123.68, 120.22, 120.18, 119.26, 118.47, 116.87, 116.64, 114.34, 114.12, 111.35, 111.27, 73.41, 73.32, 64.62, 47.48, 42.21, 30.22, 27.55. HRMS (ESI, m/z): [M+H]<sup>+</sup> calcd. For C<sub>36</sub>H<sub>28</sub>FN<sub>5</sub>O<sub>4</sub>: 614.2198; Found: 614.2206.

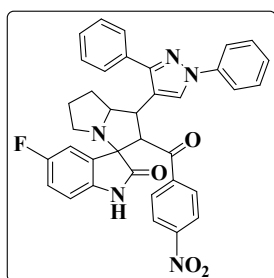

(101 MHz, DMSO-*d*<sub>6</sub>) δ: 197.87, 179.04, 159.05, 156.69, 152.43, 150.27, 142.00, 139.95, 138.60, 138.58, 134.04, 132.25, 130.25, 130.01, 129.94, 129.70, 129.42, 127.16, 126.57, 124.42, 123.68, 120.22, 120.18, 119.26, 118.47, 116.87, 116.64, 114.34, 114.12, 111.35, 111.27, 73.41, 73.32, 64.62, 47.48, 42.21, 30.22, 27.55. HRMS (ESI, m/z): [M+H]<sup>+</sup> calcd. For C<sub>36</sub>H<sub>28</sub>FN<sub>5</sub>O<sub>4</sub>: 614.2198; Found: 614.2206.

**(dl)-1'-(1,3-diphenyl-1H-pyrazol-4-yl)-5-fluoro-2'-(3-nitrobenzoyl)-1',2',5',6',7',7a'-hexahydrospiro[indoline-3,3'-pyrrolizin]-2-one (4v).** White Solid. mp: 179-180 °C. IR (KBr, cm<sup>-1</sup>): 3179, 1717, 1689, 1600. <sup>1</sup>H NMR (400 MHz, DMSO-*d*<sub>6</sub>) δ: 10.15 (s, 1H), 9.01 (s, 1H), 8.37 (d, *J* = 8.0 Hz, 1H), 8.17 (t, *J* = 7.6 Hz, 1H), 7.88 (dd, *J* = 7.6, 5.6 Hz, 4H), 7.84 (d, *J* = 7.6 Hz, 1H), 7.61 (dd, *J* = 14.0, 8.0 Hz, 3H), 7.53 – 7.47 (m, 3H), 7.29 (t, *J* = 7.6 Hz, 1H), 6.99 (td, *J* = 9.2, 2.4 Hz, 1H), 6.81 (dd, *J* = 8.8, 4.4 Hz, 1H), 6.44 (dd, *J* = 8.8, 4.4 Hz, 1H), 5.23 (d, *J* = 11.6 Hz, 1H), 4.05 – 3.96 (m, 1H), 3.84 – 3.76 (m, 1H), 2.40 (dt, *J* = 12.4, 6.4 Hz, 1H), 2.34 (dd, *J* = 12.0, 5.6 Hz, 1H), 1.73 – 1.67 (m, 1H), 1.64 (dd, *J* = 12.4, 6.4 Hz, 2H), 1.26 (dd, *J* = 11.2, 6.4 Hz, 1H). <sup>13</sup>C

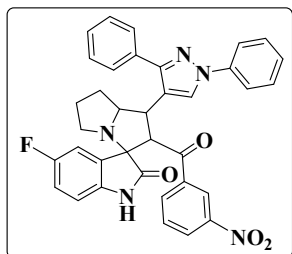

NMR (101 MHz, DMSO-*d*<sub>6</sub>) δ: 197.04, 179.15, 159.05, 156.68, 152.45, 147.85, 139.97, 138.60, 138.24, 134.36, 134.09, 130.52, 129.93, 129.08, 128.94, 128.62, 127.95, 127.25, 126.61, 126.55, 122.92, 120.17, 118.50, 116.76, 116.53, 114.32, 114.07, 111.17, 111.09, 73.27, 73.25, 64.38, 47.56, 42.30, 30.03, 27.39. HRMS (ESI, *m/z*): [M+H]<sup>+</sup> calcd. for C<sub>36</sub>H<sub>28</sub>FN<sub>5</sub>O<sub>4</sub>: 614.2198; Found: 614.2194.

**(dl)-1'-(1,3-diphenyl-1H-pyrazol-4-yl)-5-fluoro-2'-(furan-2-carbonyl)-1',2',5',6',7',7a'-hexahydro spiro[indoline-3,3'-pyrrolizin]-2-one (4w).** White Solid. mp: 179-180 °C. IR (KBr, cm<sup>-1</sup>): 3222, 1723, 1669, 1599. <sup>1</sup>H NMR (400 MHz, DMSO-*d*<sub>6</sub>) δ: 10.40 (s, 1H), 8.86 (s, 1H), 7.87 (dd, *J* = 20.4, 8.0 Hz, 4H), 7.57 (t, *J* = 7.2 Hz, 2H), 7.49 (dd, *J* = 13.2, 7.6 Hz, 4H), 7.34 (d, *J* = 3.2 Hz, 1H), 7.29 (t, *J* = 7.2 Hz, 1H), 7.02 (t, *J* = 9.6 Hz, 1H), 6.85 (d, *J* = 8.4 Hz, 1H), 6.68 (dd, *J* = 8.4, 4.4 Hz, 1H), 6.61 (s, 1H), 4.80 (d, *J* = 11.6 Hz, 1H), 4.02 (t, *J* = 11.2 Hz, 1H), 3.80 (dd, *J* = 15.6, 6.8 Hz, 1H), 2.40 (dd, *J* = 24.4, 8.4 Hz, 2H), 1.66 (dd, *J*

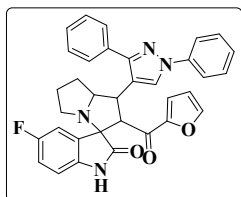

= 13.2, 7.6 Hz, 2H), 1.26 (dd, *J* = 11.2, 6.4 Hz, 1H), 1.13 (t, *J* = 7.2 Hz, 1H). <sup>13</sup>C NMR (101 MHz, DMSO-*d*<sub>6</sub>) δ: 183.89, 179.44, 158.88, 156.52, 152.42, 151.99, 149.27, 139.88, 138.55, 133.86, 129.94, 129.22, 129.02, 128.87, 128.62, 128.19, 127.13, 126.96, 126.89, 126.60, 125.93, 121.04, 120.05, 118.49, 114.86, 114.61, 112.95, 111.15, 111.07, 73.90, 73.13, 63.40, 47.50, 42.30, 30.01, 27.41. HRMS (ESI, *m/z*): [M+H]<sup>+</sup> calcd. for C<sub>34</sub>H<sub>27</sub>FN<sub>4</sub>O<sub>3</sub>: 559.2140; Found: 559.2142.

**(dl)-1'-(1,3-diphenyl-1H-pyrazol-4-yl)-5-fluoro-2'-(thiophene-2-carbonyl)-1',2',5',6',7',7a'-hexahydrospiro[indoline-3,3'-pyrrolizin]-2-one (4x).** White Solid. mp: 179-180 °C. IR (KBr, cm<sup>-1</sup>): 1722, 1656, 1599. <sup>1</sup>H NMR (400 MHz, DMSO-*d*<sub>6</sub>) δ: 10.36 (s, 1H), 8.92 (s, 1H), 7.90 – 7.85 (m, 4H), 7.83 (s, 1H), 7.57 (t, *J* = 7.6 Hz, 2H), 7.49 (dd, *J* = 15.2, 7.6 Hz, 4H), 7.30 (d, *J* = 7.6 Hz, 1H), 7.15 (t, *J* = 4.8 Hz, 1H), 7.01 (td, *J* = 10.4, 4.0 Hz, 1H), 6.85 (dd, *J* = 8.4, 2.4 Hz, 1H), 6.63 (dd, *J* = 8.8, 4.4 Hz, 1H), 5.01 (d, *J* = 11.2 Hz, 1H), 4.07 – 3.98 (m, 1H), 3.80 (dd, *J* = 15.6, 6.4 Hz, 1H), 2.43 (dd, *J* = 11.6, 4.4 Hz, 1H), 2.36

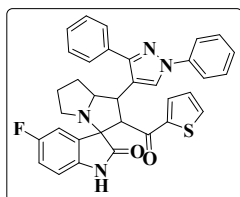

(dd, *J* = 10.4, 5.2 Hz, 1H), 1.74 – 1.69 (m, 1H), 1.65 (dd, *J* = 13.2, 5.6 Hz, 2H), 1.25 (dd, *J* = 11.2, 6.4 Hz, 1H). <sup>13</sup>C NMR (101 MHz, DMSO-*d*<sub>6</sub>) δ: 189.43, 179.48, 156.58, 152.45, 144.02, 139.90, 138.52, 136.63, 134.63, 133.91, 129.92, 129.03, 128.95, 128.87, 128.62, 127.14, 126.99, 126.92, 126.57, 120.06, 118.48, 116.48, 116.24, 114.81, 114.57, 111.09, 111.02, 74.04, 73.25, 64.01, 47.59, 42.62, 30.05, 27.43. HRMS (ESI, *m/z*): [M+H]<sup>+</sup> calcd. for C<sub>34</sub>H<sub>27</sub>FN<sub>4</sub>O<sub>2</sub>S: 575.1912; Found: 575.1917.

**(dl)-2'-benzoyl-5-bromo-1'-(1,3-diphenyl-1H-pyrazol-4-yl)-1',2',5',6',7',7a'-hexahydrospiro[indolin-e-3,3'-pyrrolizin]-2-one (4y).** White Solid. mp: 179-180 °C. IR (KBr, cm<sup>-1</sup>): 33209, 1726, 1598. <sup>1</sup>H NMR (400 MHz, DMSO-*d*<sub>6</sub>) δ: 10.16 (s, 1H), 8.96 (s, 1H), 7.89 (dd, *J* = 7.6, 4.0 Hz, 4H), 7.60 (t, *J* = 7.6 Hz, 2H), 7.54 – 7.48 (m, 6H), 7.31 (dd, 15.6, 8.0 Hz, 3H), 6.99 (t, *J* = 11.6 Hz, 1H), 6.80 (dd, *J* = 8.4, 2.4 Hz, 1H), 6.50 (dd, *J* = 8.4, 4.4 Hz, 1H), 5.18 (d, *J* = 11.6 Hz, 1H), 4.03 (t, *J* = 11.6 Hz, 1H), 3.79 (dd, *J* = 16.0, 6.4 Hz, 1H), 2.41 (dd, *J* = 9.2, 7.6 Hz, 1H), 2.33 (dd, *J* = 11.2, 6.0 Hz, 1H), 1.70 (dd, *J* = 12.4, 5.6 Hz, 1H), 1.63 (dd, *J* = 13.6, 7.2 Hz, 2H), 1.24 (dd, *J* = 12.0, 6.8 Hz, 1H). <sup>13</sup>C NMR (101 MHz, DMSO-*d*<sub>6</sub>) δ:

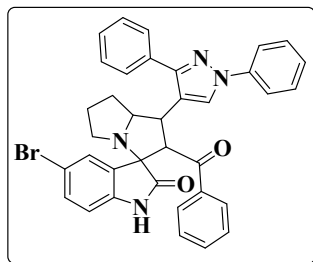

198.09, 178.73, 152.50, 141.72, 139.94, 137.19, 134.03, 133.83, 132.55, 129.92, 129.62, 129.01, 128.95, 128.72, 128.64, 128.40, 127.72, 127.04, 126.53, 120.21, 118.45, 113.28, 112.14, 73.26, 73.15, 63.18, 47.65, 42.66, 29.91, 27.31. HRMS (ESI, *m/z*): [M+H]<sup>+</sup> calcd. for C<sub>36</sub>H<sub>29</sub>BrN<sub>4</sub>O<sub>2</sub>: 629.1547; Found: 629.1516.

**(dl)-5-bromo-1'-(1,3-diphenyl-1H-pyrazol-4-yl)-2'-(4-fluorobenzoyl)-1',2',5',6',7',7a'-hexahydrospiro[indoline-3,3'-pyrrolizin]-2-one (4z).** White Solid. mp: 179-180 °C. IR (KBr, cm<sup>-1</sup>): 3198, 1740, 1683, 1598. <sup>1</sup>H NMR (400 MHz, DMSO-*d*<sub>6</sub>) δ: 10.29 (s, 1H), 8.99 (s, 1H), 7.89 (dd, *J* = 11.6, 8.0 Hz, 4H), 7.60 (s, 4H), 7.49 (m, 3H), 7.34 (d, *J* = 8.0 Hz, 1H), 7.29 (t, *J* = 6.0 Hz, 1H), 7.18 (t, *J* = 8.4 Hz, 2H), 7.13 (s, 1H), 6.52 (d, *J* = 7.6 Hz, 1H), 5.18 (d, *J* = 11.2 Hz, 1H), 4.01 (t, *J* = 12.0 Hz, 1H), 3.81 – 3.70 (m, 1H), 2.38 – 2.30 (m, 2H), 1.69 – 1.53 (m, 3H), 1.16 (dd, *J* = 10.4, 3.2 Hz, 1H). <sup>13</sup>C NMR (101 MHz, DMSO-*d*<sub>6</sub>) δ: 196.72, 178.67, 168.34, 166.79, 152.49, 141.66, 139.94, 134.03, 133.95, 133.93, 132.64, 131.48, 131.38, 129.94, 129.56, 129.02, 128.94, 128.65, 127.63, 127.10, 126.54, 120.13, 118.43, 115.91, 115.69, 113.35, 112.21, 73.35, 73.20, 63.35, 47.63, 42.52, 30.00, 27.41. HRMS (ESI, *m/z*): [M+H]<sup>+</sup> calcd. for C<sub>36</sub>H<sub>28</sub>BrFN<sub>4</sub>O<sub>2</sub>: 647.1452; Found: 647.1459.

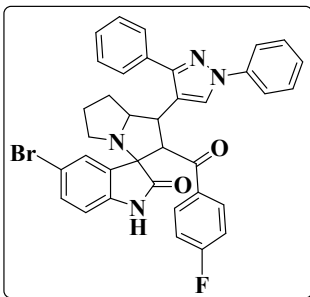

**(dl)-5-bromo-2'-(4-chlorobenzoyl)-1'-(1,3-diphenyl-1H-pyrazol-4-yl)-1',2',5',6',7',7a'-hexahydrospiro[indoline-3,3'-pyrrolizin]-2-one (4aa).** White Solid. mp: 179-180 °C. IR (KBr, cm<sup>-1</sup>): 3208, 1724, 1679, 1598. <sup>1</sup>H NMR (400 MHz, DMSO-*d*<sub>6</sub>) δ: 10.30 (s, 1H), 8.99 (s, 1H), 7.89 (dd, 10.4, 7.2 Hz, 4H), 7.60 (t, *J* = 6.8 Hz, 3H), 7.50 – 7.47 (m, 4H), 7.41 (d, *J* = 8.0 Hz, 2H), 7.35 (d, *J* = 8.0 Hz, 1H), 7.29 (t, *J* = 7.2 Hz, 1H), 7.12 (s, 1H), 6.53 (d, *J* = 7.6 Hz, 1H), 5.17 (d, *J* = 11.6 Hz, 1H), 4.00 (t, *J* = 11.2 Hz, 1H), 3.77 (d, *J* = 7.6 Hz, 1H), 2.34 (s, 2H), 1.62 (dd, *J* = 10.4, 6.4 Hz, 3H), 1.17 (dd, *J* = 10.4, 4.8 Hz, 1H). <sup>13</sup>C NMR (101 MHz, DMSO-*d*<sub>6</sub>) δ: 197.24, 178.60, 153.24, 152.48, 141.65, 139.93, 139.42, 138.85, 136.79, 135.87, 134.01, 132.70, 132.33, 130.60, 130.25, 129.95, 129.40, 129.03, 128.94, 128.87, 128.67, 127.56, 127.11, 126.56, 121.54, 120.07, 119.21, 118.43, 113.38, 112.26, 73.32, 73.21, 63.41, 47.64, 42.48, 30.00, 27.42. HRMS (ESI, *m/z*): [M+H]<sup>+</sup> calcd. for C<sub>36</sub>H<sub>28</sub>BrClN<sub>4</sub>O<sub>2</sub>: 663.1157; Found: 663.1165.

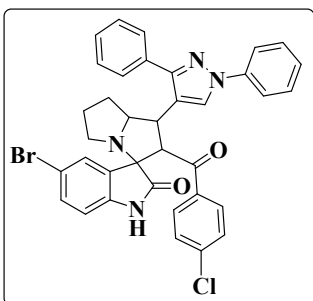



**(dl)-5-bromo-1'-(1,3-diphenyl-1H-pyrazol-4-yl)-2'-(4-methoxybenzoyl)-1',2',5',6',7',7a'-hexahydro spiro[indoline-3,3'-pyrrolizin]-2-one (4ab).** White Solid. mp: 179-180 °C. IR (KBr,

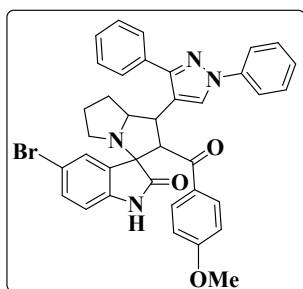

cm<sup>-1</sup>): 3118, 1721, 1668, 1598. <sup>1</sup>H NMR (400 MHz, DMSO-*d*<sub>6</sub>) δ: 10.31 (s, 1H), 8.96 (s, 1H), 7.90 (dd, *J* = 22.4, 7.2 Hz, 4H), 7.59 (d, *J* = 6.4 Hz, 4H), 7.49 (d, *J* = 8.4 Hz, 3H), 7.31 (dd, 16.4, 7.2 Hz, 2H), 7.17 (s, 1H), 6.86 (d, *J* = 7.6 Hz, 2H), 6.54 (d, *J* = 7.6 Hz, 1H), 5.14 (d, *J* = 11.6 Hz, 1H), 4.04 (t, *J* = 104 Hz, 1H), 3.88 (s, 1H), 3.78 (s, 3H), 2.34 (s, 2H), 1.61 (s, 3H), 1.16 (dd, *J* = 11.2, 10.4 Hz, 1H). <sup>13</sup>C NMR (101 MHz, DMSO-*d*<sub>6</sub>) δ: 195.77, 178.80, 163.77, 152.50, 141.64, 139.93, 134.02, 132.44, 130.97, 130.09, 129.92, 129.78, 128.98, 128.94, 128.63, 127.85, 127.02, 126.51, 120.24, 118.42, 113.99, 113.25, 112.11, 73.59, 73.16,

62.56, 55.97, 47.65, 42.79, 30.01, 27.41. HRMS (ESI, *m/z*): [M+H]<sup>+</sup> calcd. for C<sub>37</sub>H<sub>31</sub>BrN<sub>4</sub>O<sub>3</sub>: 659.1652; Found: 659.1658.

**(dl)-5-bromo-1'-(1,3-diphenyl-1H-pyrazol-4-yl)-2'-(4-nitrobenzoyl)-1',2',5',6',7',7a'-hexahydrospiro[indoline-3,3'-pyrrolizin]-2-one (4ac).** White Solid. mp: 179-180 °C. IR (KBr,

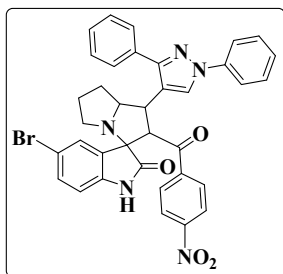

cm<sup>-1</sup>): 3379, 1719, 1615, 1599. <sup>1</sup>H NMR (400 MHz, DMSO-*d*<sub>6</sub>) δ: 10.20 (s, 1H), 9.03 (s, 1H), 8.15 (d, *J* = 4.8 Hz, 2H), 7.89 (s, 4H), 7.63 (dd, *J* = 22.8, 7.6 Hz, 4H), 7.51 (d, *J* = 6.4 Hz, 3H), 7.38 (d, *J* = 6.8 Hz, 1H), 7.30 (t, *J* = 6.4 Hz, 1H), 7.12 (s, 1H), 6.49 (d, *J* = 6.4 Hz, 1H), 5.27 (d, *J* = 9.2 Hz, 1H), 4.03 – 3.92 (m, 1H), 3.81 – 3.72 (m, 1H), 2.34 (d, *J* = 4.0 Hz, 2H), 1.62 (dd, *J* = 3.6, 2.4 Hz, 3H), 1.19 (dd, *J* = 6.4, 4.0 Hz, 1H). <sup>13</sup>C NMR (101 MHz, DMSO-*d*<sub>6</sub>) δ: 197.92, 178.46, 152.51, 150.33, 141.96, 141.65, 139.94, 134.00, 132.94, 129.96, 129.69, 129.36, 129.06, 128.95,

128.70, 127.36, 127.17, 126.60, 123.74, 119.95, 118.46, 113.56, 112.48, 73.27, 73.21, 64.40, 47.59, 42.33, 30.07, 27.48. HRMS (ESI, *m/z*): [M+H]<sup>+</sup> calcd. for C<sub>36</sub>H<sub>28</sub>BrN<sub>5</sub>O<sub>4</sub>: 674.1397; Found: 674.1409.

**(dl)-5-bromo-1'-(1,3-diphenyl-1H-pyrazol-4-yl)-2'-(3-nitrobenzoyl)-1',2',5',6',7',7a'-hexahydrospir -ofindoline-3,3'-pyrrolizin]-2-one (4ad):** White Solid. mp: 179-180 °C. IR (KBr,

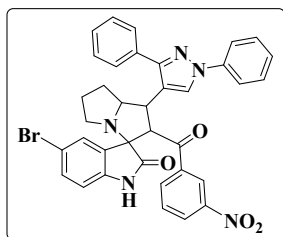

cm<sup>-1</sup>): 3168, 1719, 1689, 1599. <sup>1</sup>H NMR (400 MHz, DMSO-*d*<sub>6</sub>) δ: 10.28 (s, 1H), 9.02 (s, 1H), 8.38 (d, *J* = 8.0 Hz, 1H), 8.18 (s, 1H), 7.89 (t, *J* = 8.8 Hz, 4H), 7.84 (d, *J* = 7.6 Hz, 1H), 7.5–7.58 (m, 3H), 7.51 (dd, *J* = 15.6, 8.0 Hz, 3H), 7.31 (dd, *J* = 15.6, 8.8 Hz, 2H), 7.12 (s, 1H), 6.44 (d, *J* = 8.4 Hz, 1H), 5.24 (d, *J* = 11.6 Hz, 1H), 4.00 (t, *J* = 11.2 Hz, 1H), 3.80 (dd, *J* = 15.6, 6.4 Hz, 1H), 2.35 (d, *J* = 3.2 Hz, 2H), 1.72 – 1.57 (m, 3H), 1.19 (dd, *J* = 11.6, 8.0 Hz, 1H). <sup>13</sup>C NMR (101 MHz, DMSO-*d*<sub>6</sub>) δ: 197.11,

178.57, 152.51, 147.88, 141.65, 139.97, 138.23, 134.33, 134.06, 132.84, 130.58, 129.94, 129.34, 129.04, 128.97, 128.67, 128.02, 127.42, 127.28, 126.57, 122.94, 119.92, 118.49, 113.53, 112.28, 73.14, 73.10, 64.17, 47.66, 42.38, 29.87, 27.33. HRMS (ESI, *m/z*): [M+H]<sup>+</sup> calcd. for C<sub>36</sub>H<sub>28</sub>BrN<sub>5</sub>O<sub>4</sub>: 674.1397; Found: 674.1409.

### 3. FT-IR, <sup>1</sup>H-NMR, <sup>13</sup>C-NMR and Mass Spectra of the Compounds

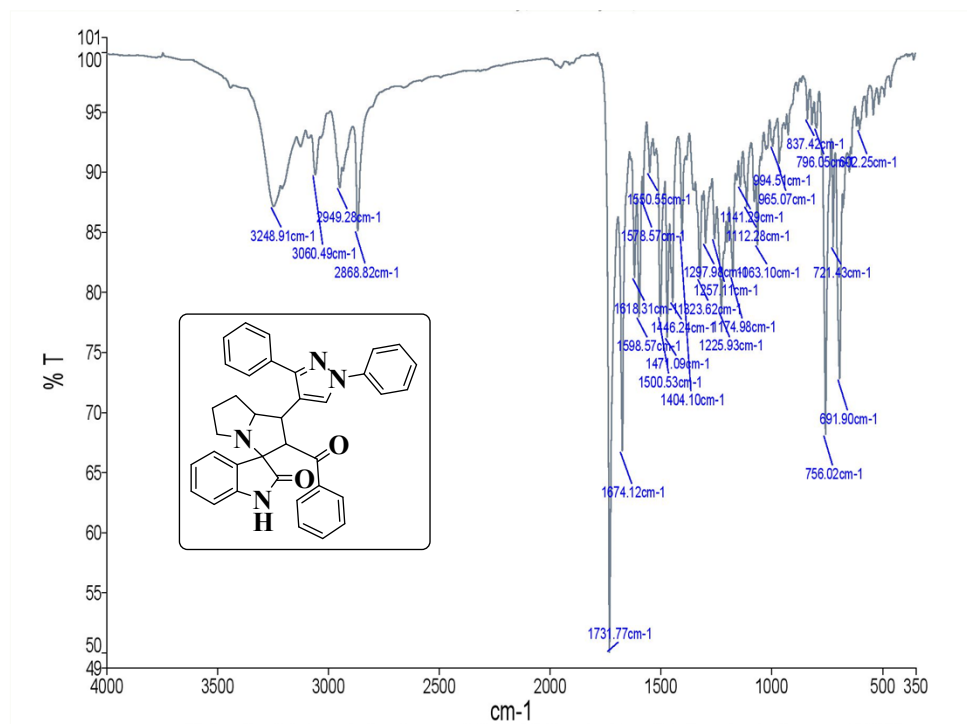

FT-IR Spectrum of the compound 4a

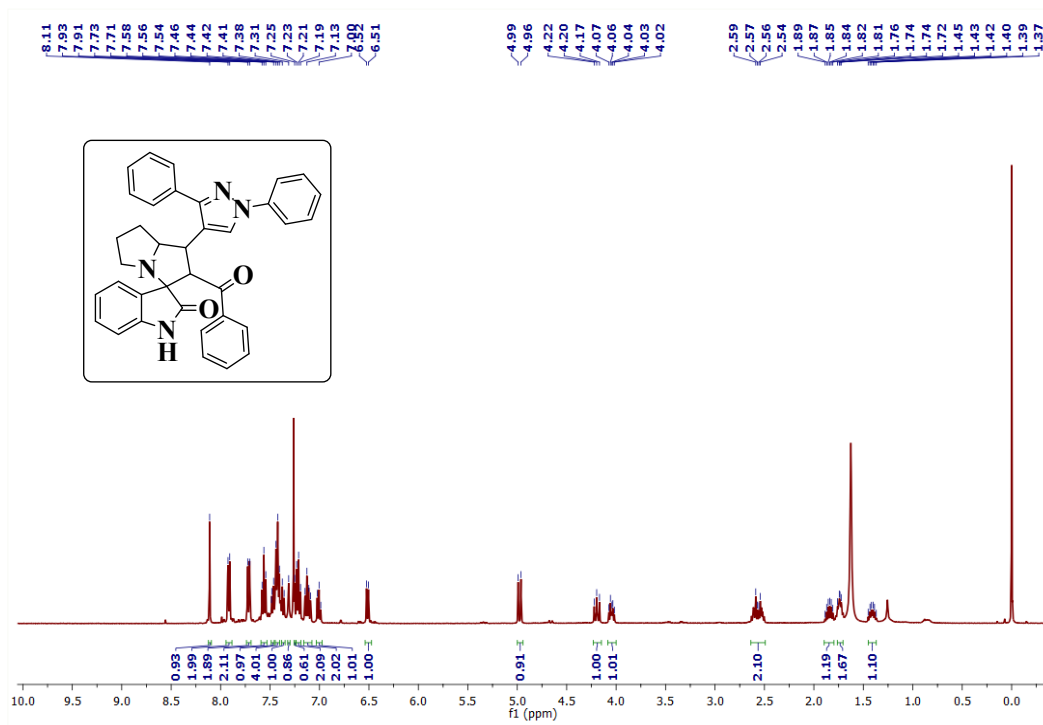

<sup>1</sup>H NMR Spectrum of the compound 4a

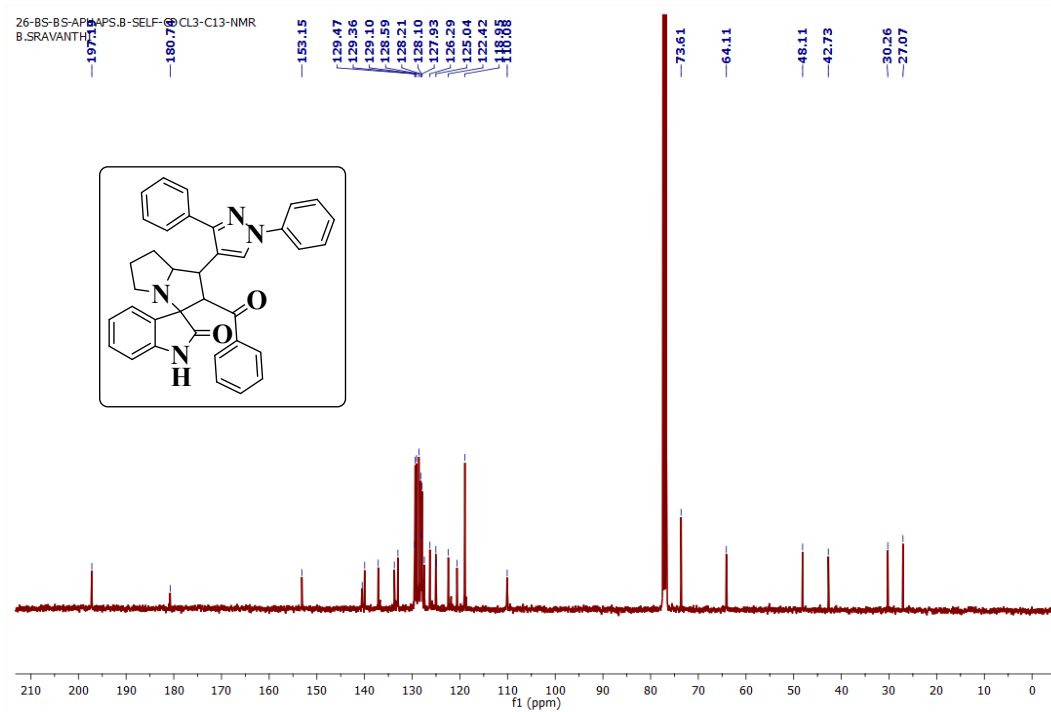

**<sup>13</sup>C NMR Spectrum of the compound 4a**

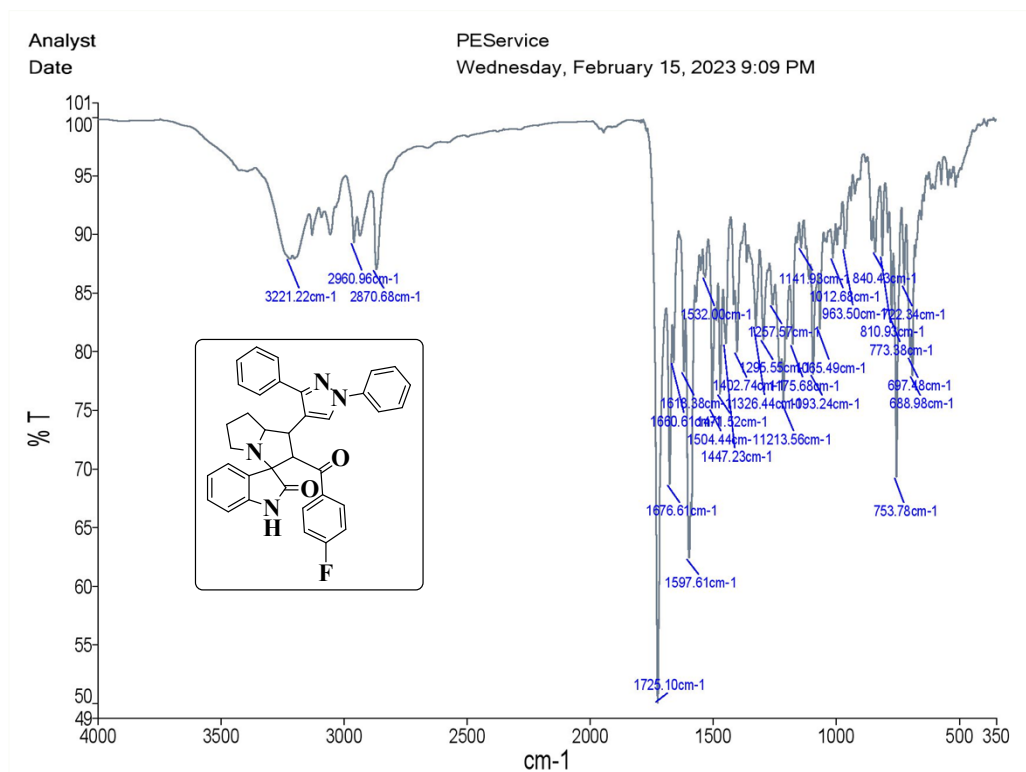

**FT-IR Spectrum of the compound 4b**

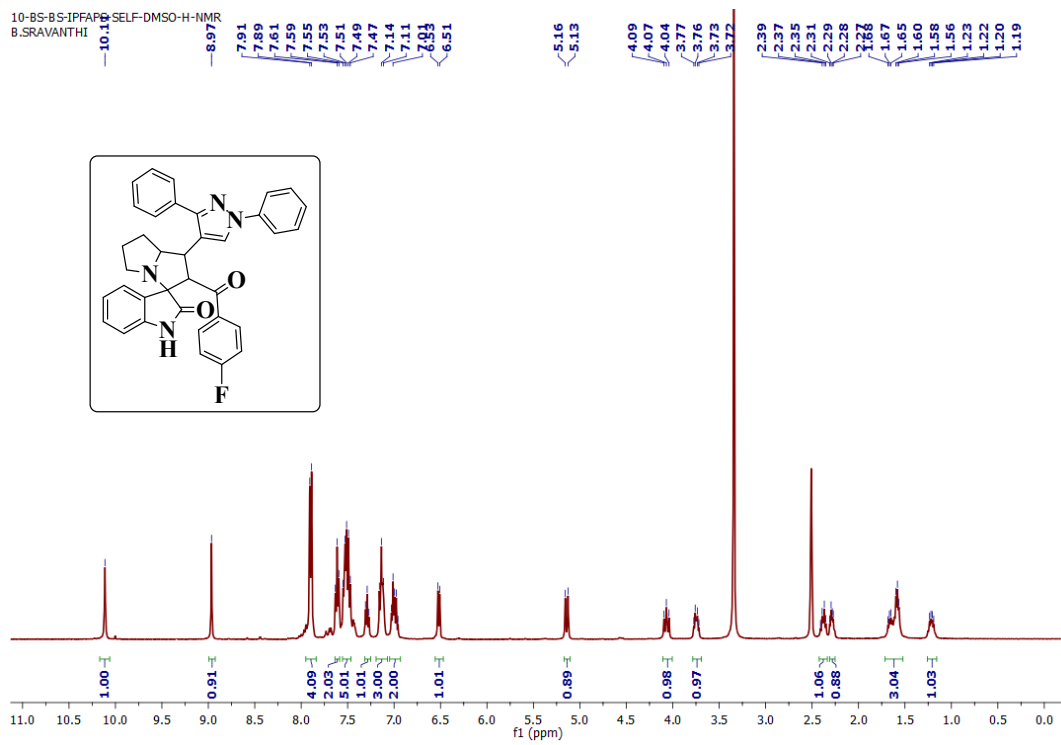

**<sup>1</sup>H NMR Spectrum of the compound 4b**

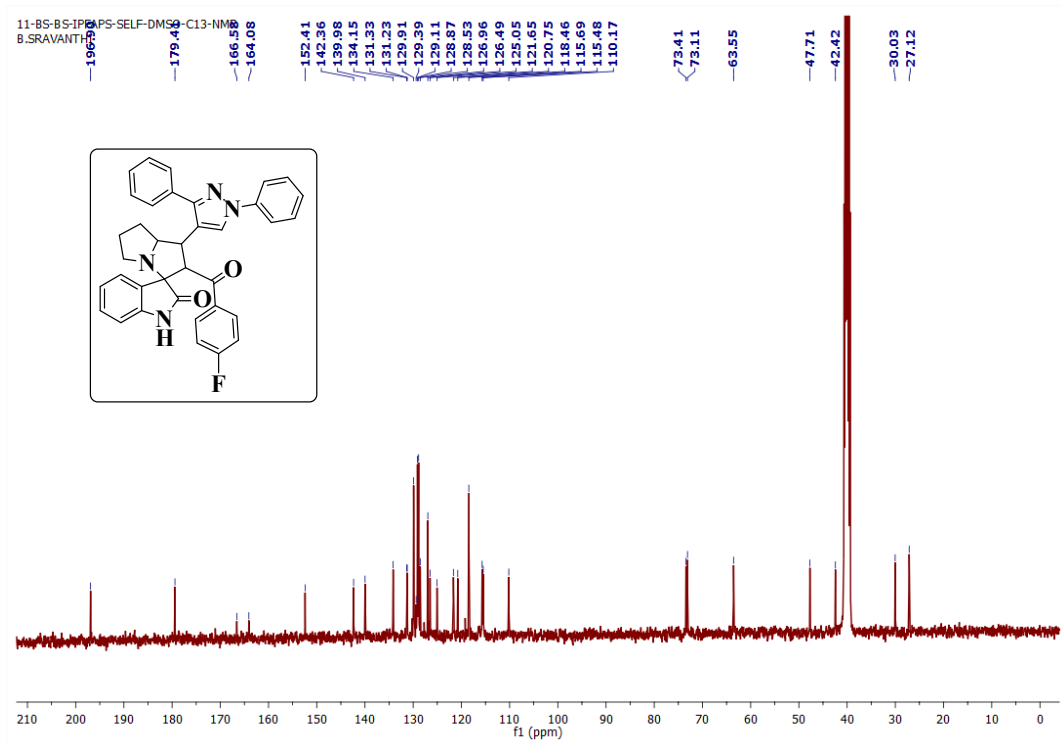

**<sup>13</sup>C NMR Spectrum of the compound 4b**

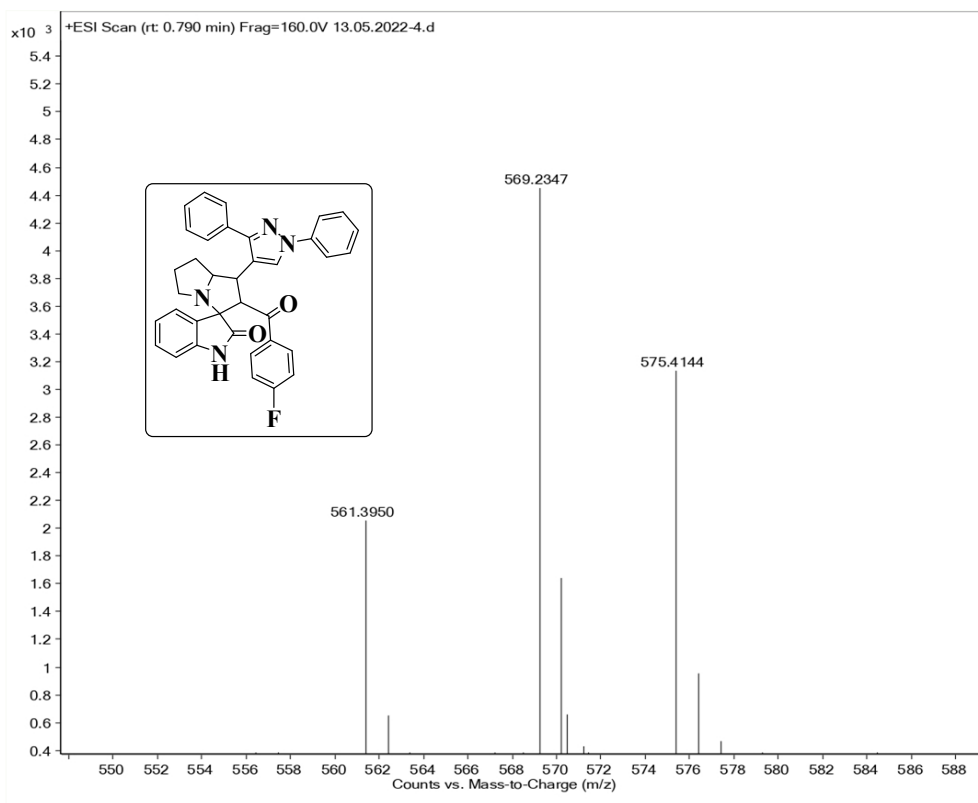

**Mass spectrum of the compound 4b**

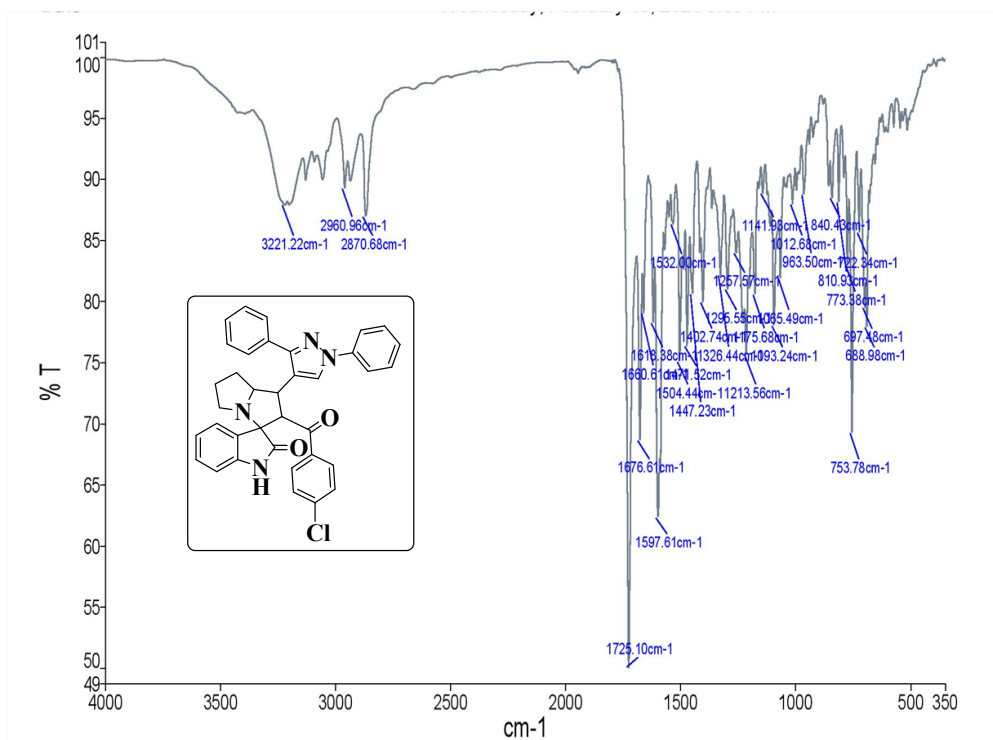

**FT-IR Spectrum of the compound 4c**

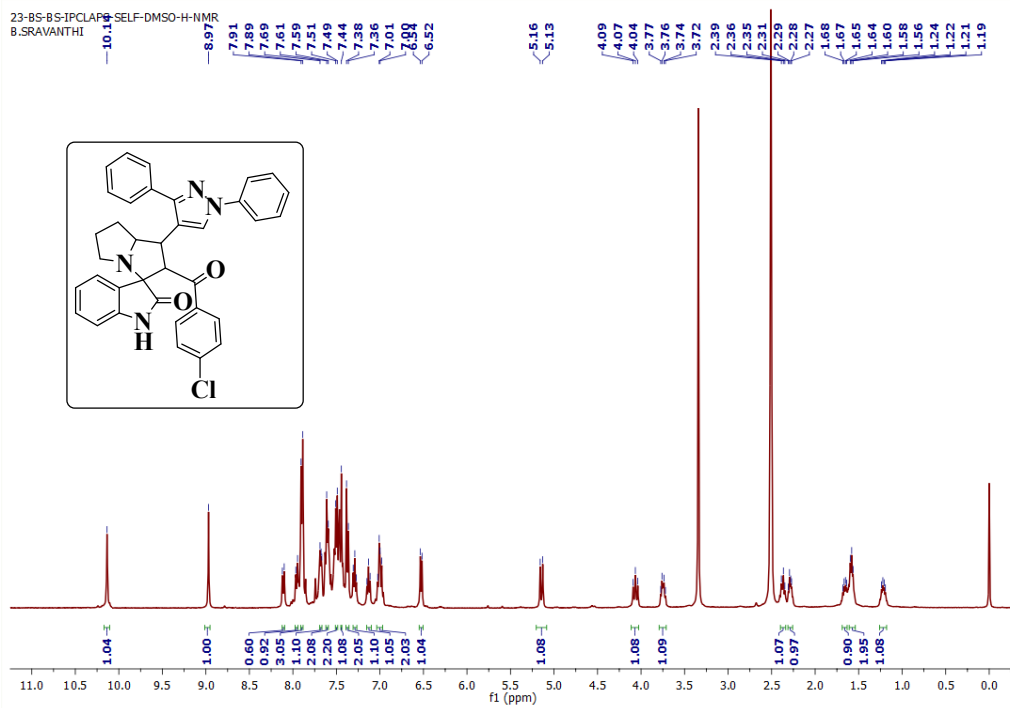

**<sup>1</sup>H NMR Spectrum of the compound 4c**

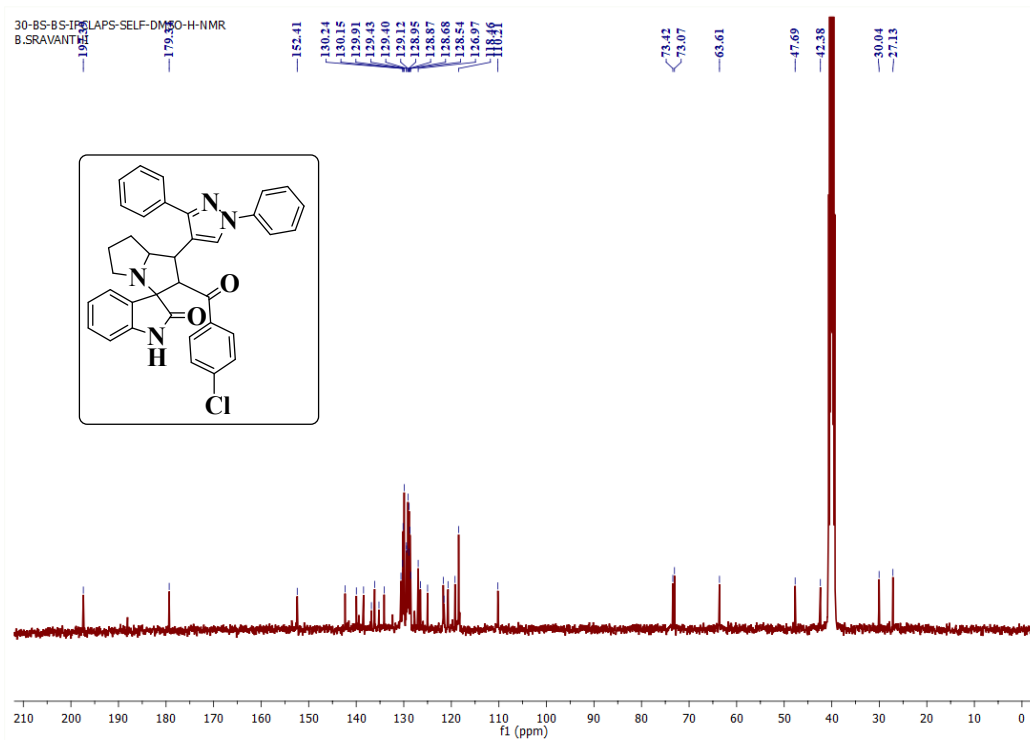

**<sup>13</sup>C NMR Spectrum of the compound 4c**

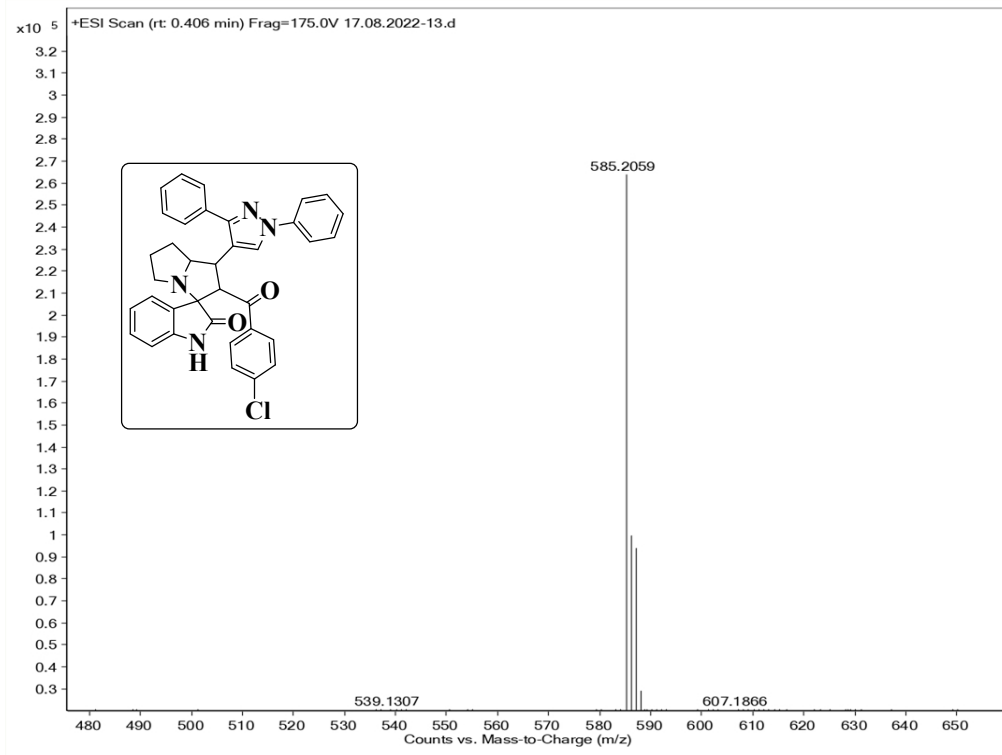

**Mass spectrum of the compound 4c**

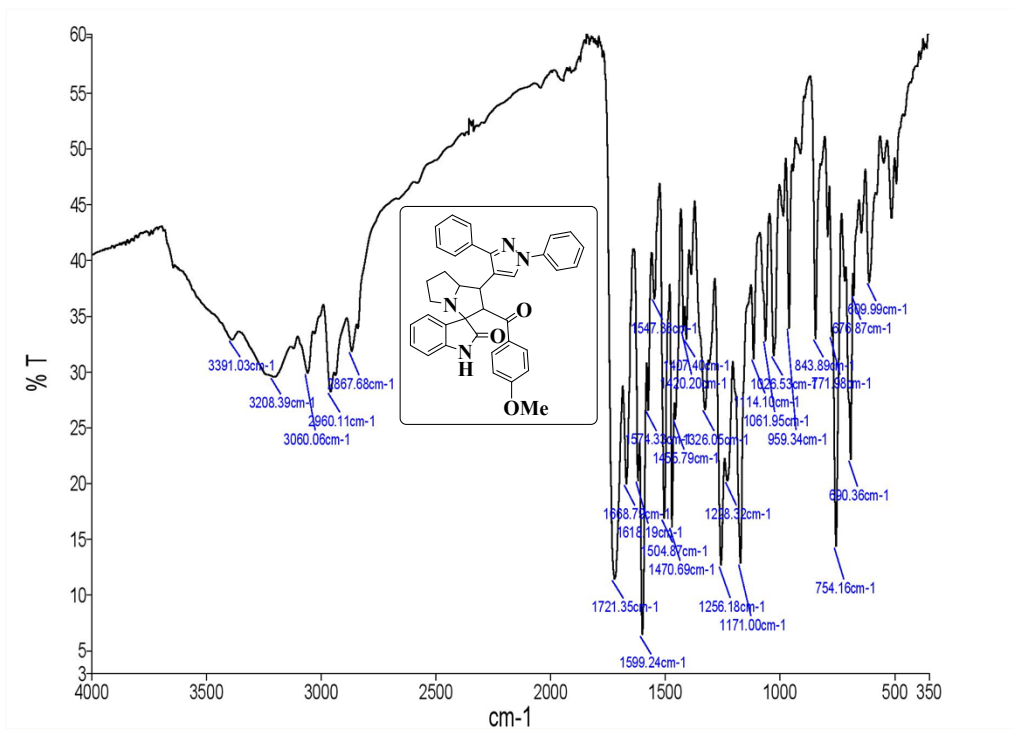

**FT-IR Spectrum of the compound 4d**

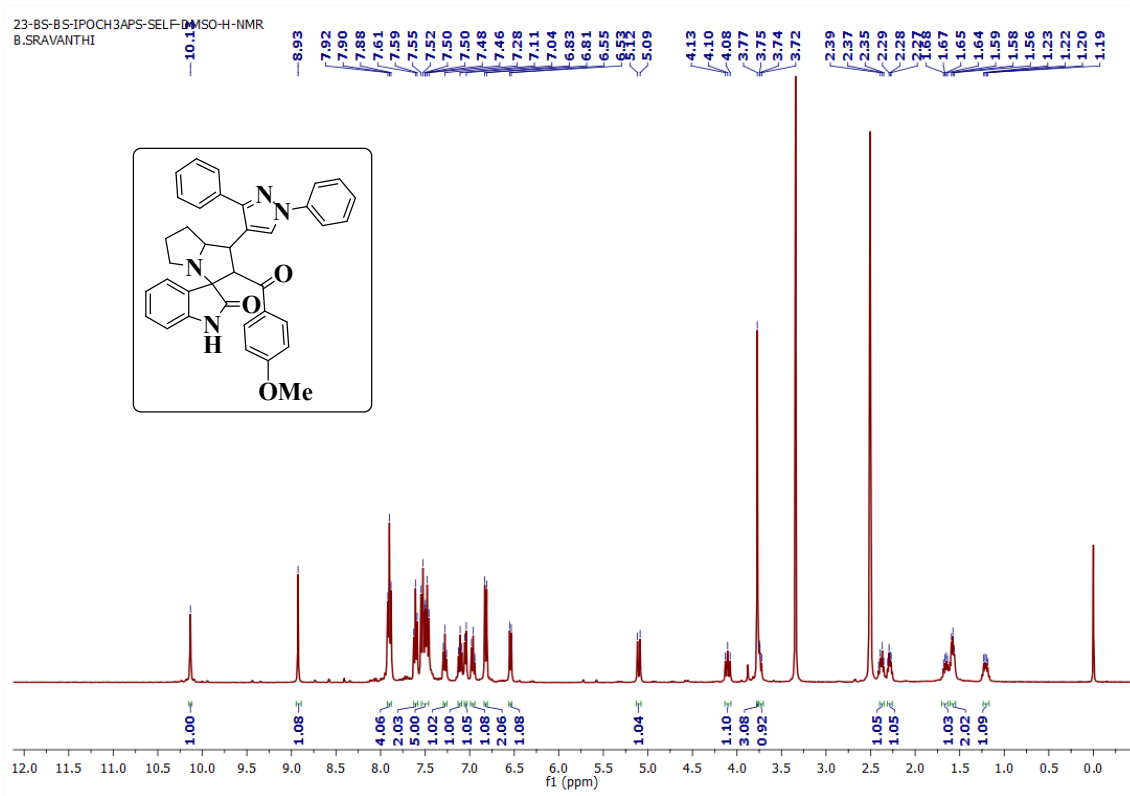

**<sup>1</sup>H NMR Spectrum of the compound 4d**

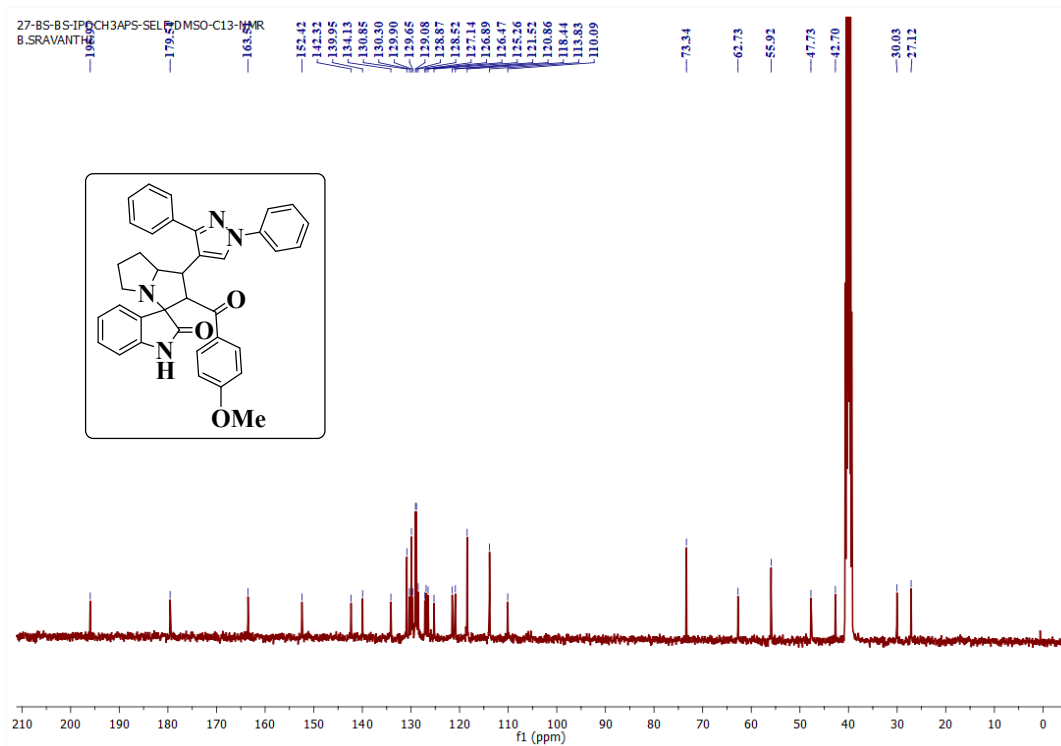

**<sup>13</sup>C NMR Spectrum of the compound 4d**



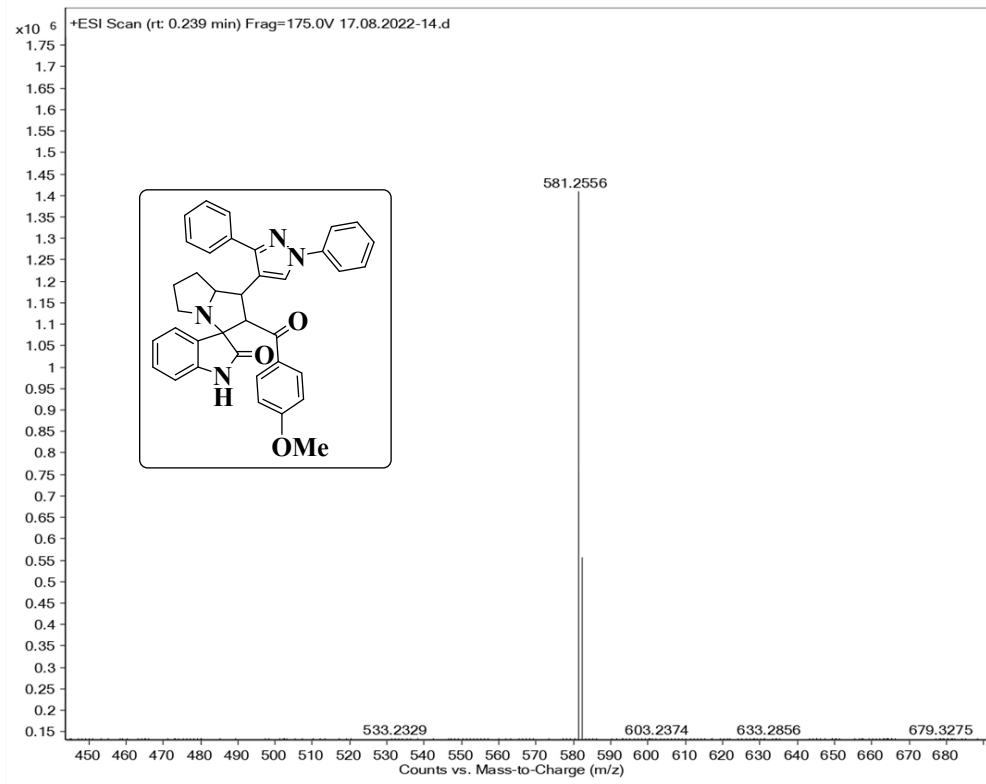

**Mass spectrum of the compound 4d**

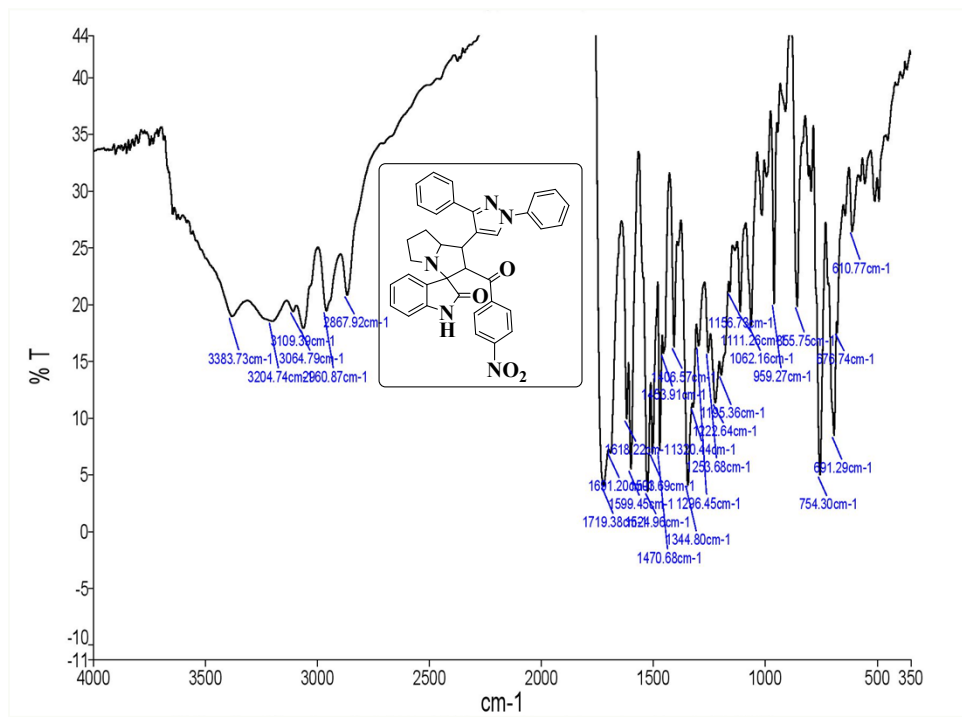

**FT-IR Spectrum of the compound 4e**

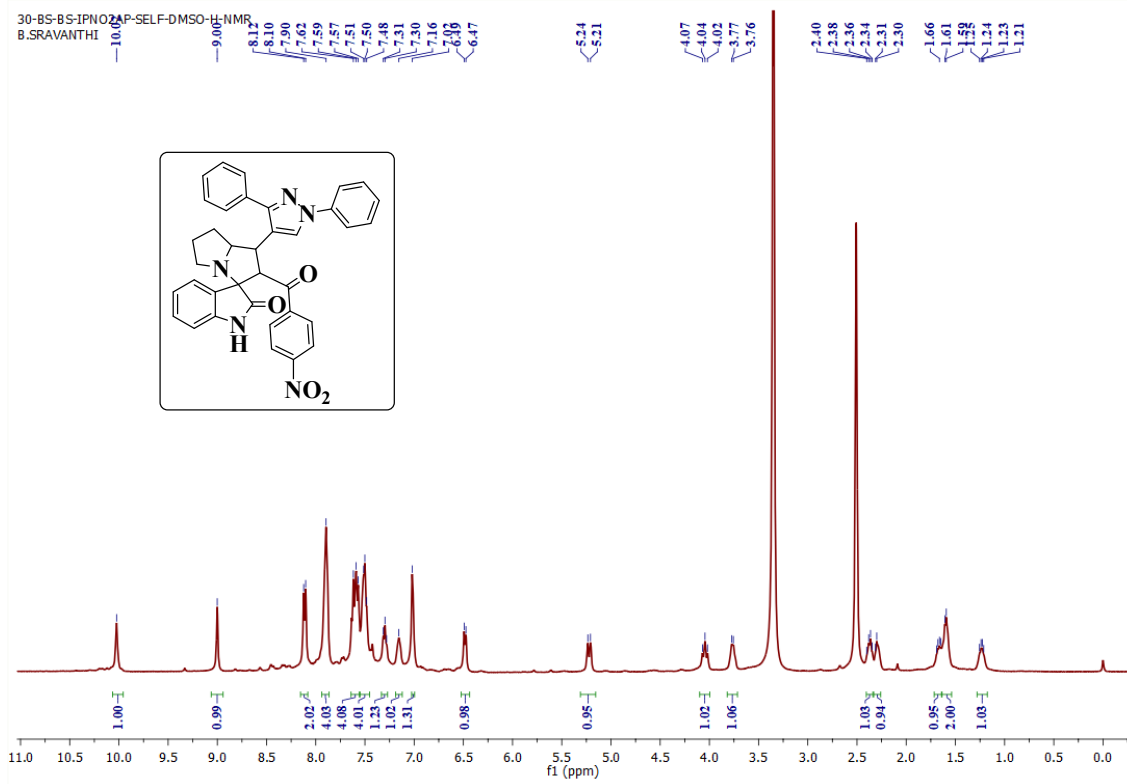

<sup>1</sup>H NMR Spectrum of the compound 4e

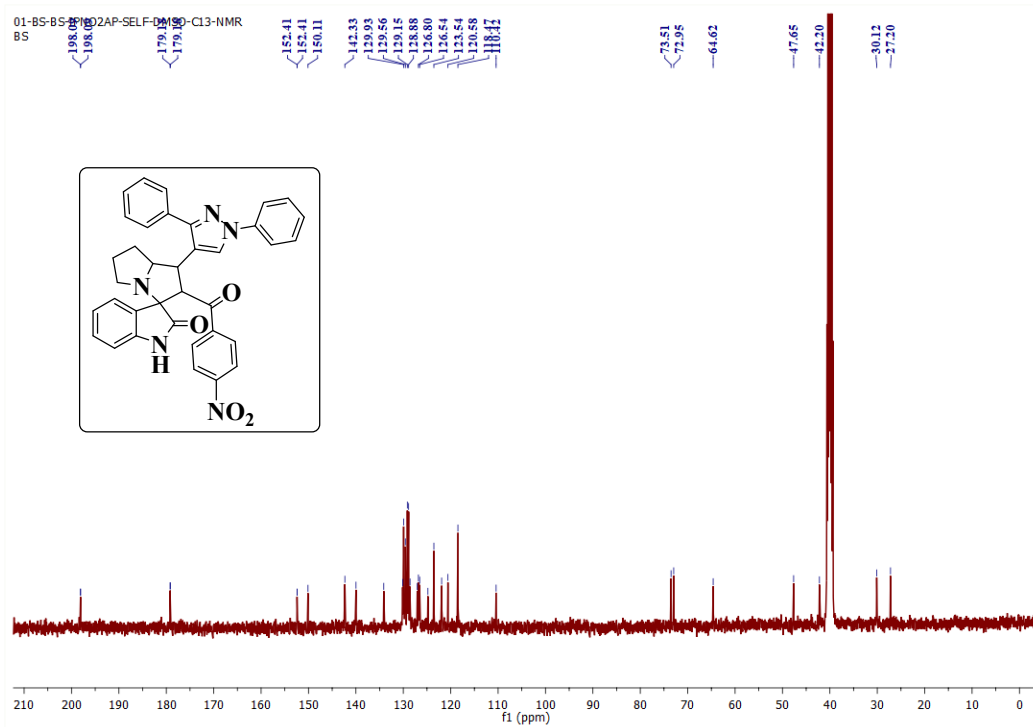

<sup>13</sup>C NMR Spectrum of the compound 4e

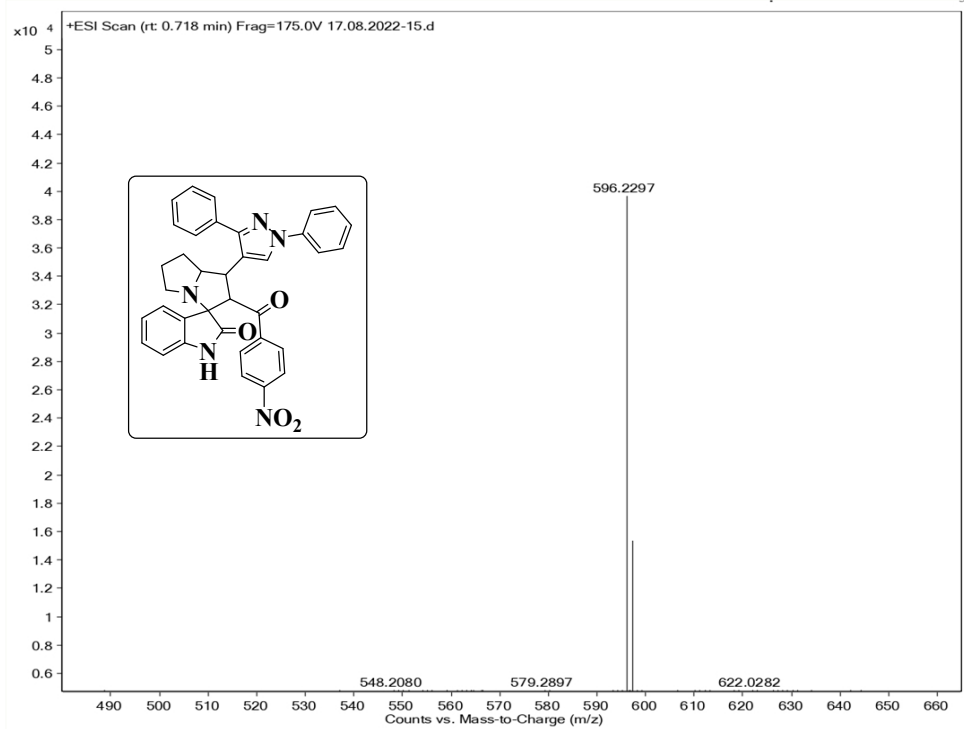

Mass spectrum of the compound 4e

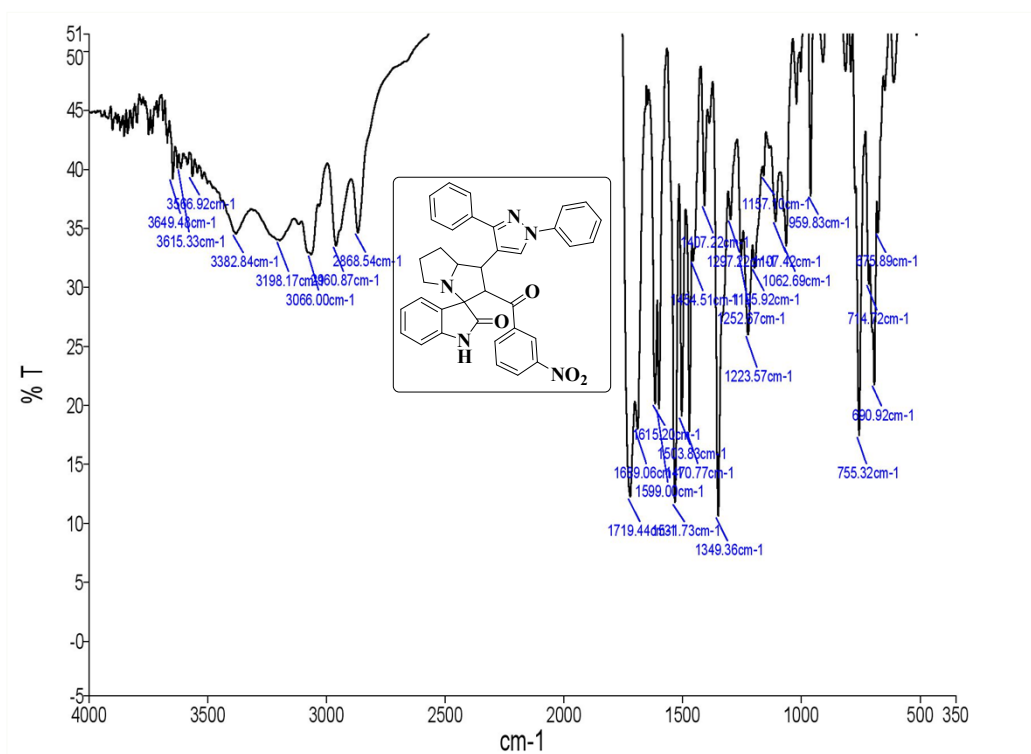

FT-IR Spectrum of the compound 4f

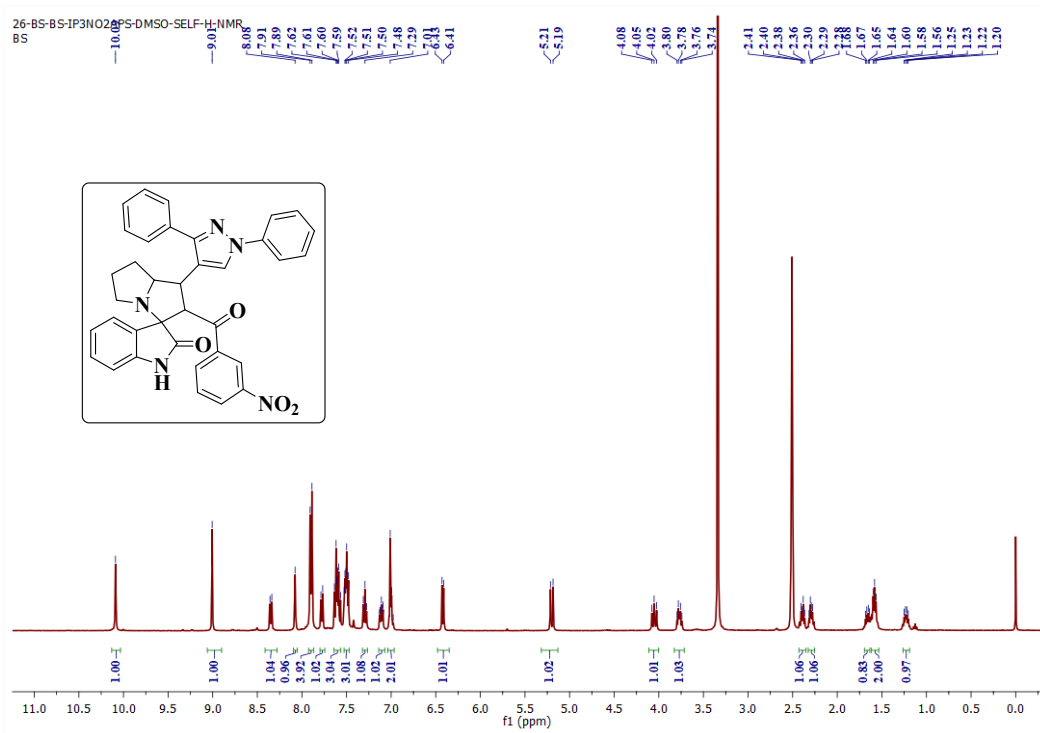

**<sup>1</sup>H NMR Spectrum of the compound 4f**

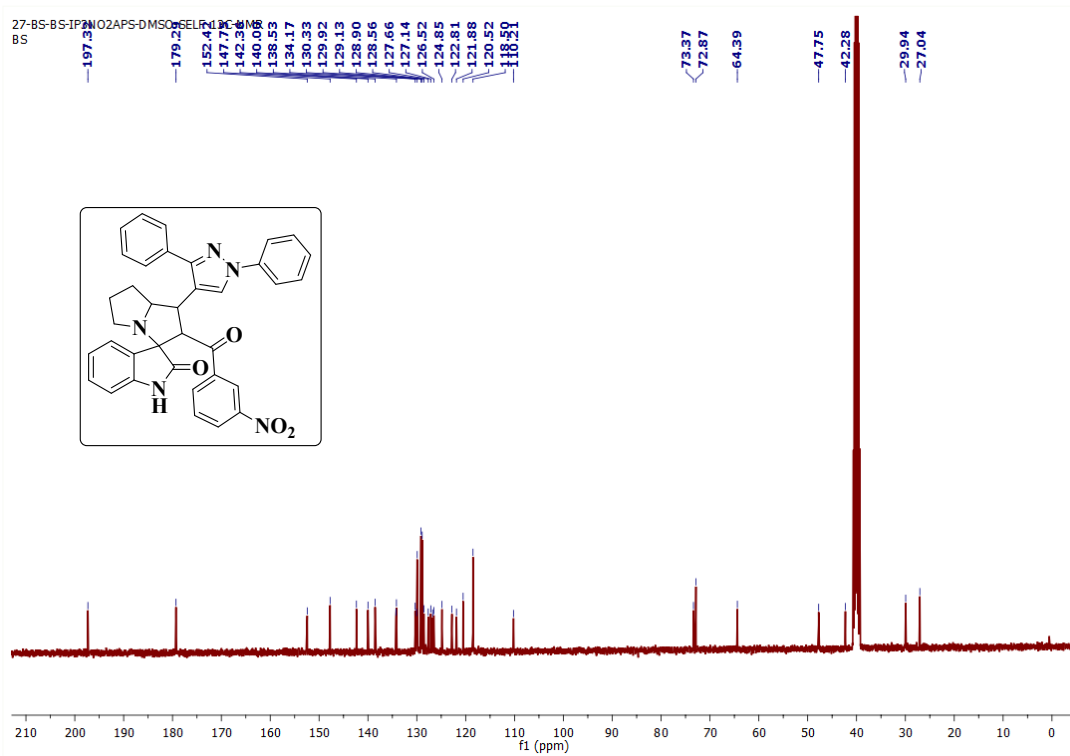

**<sup>13</sup>C NMR Spectrum of the compound 4f**

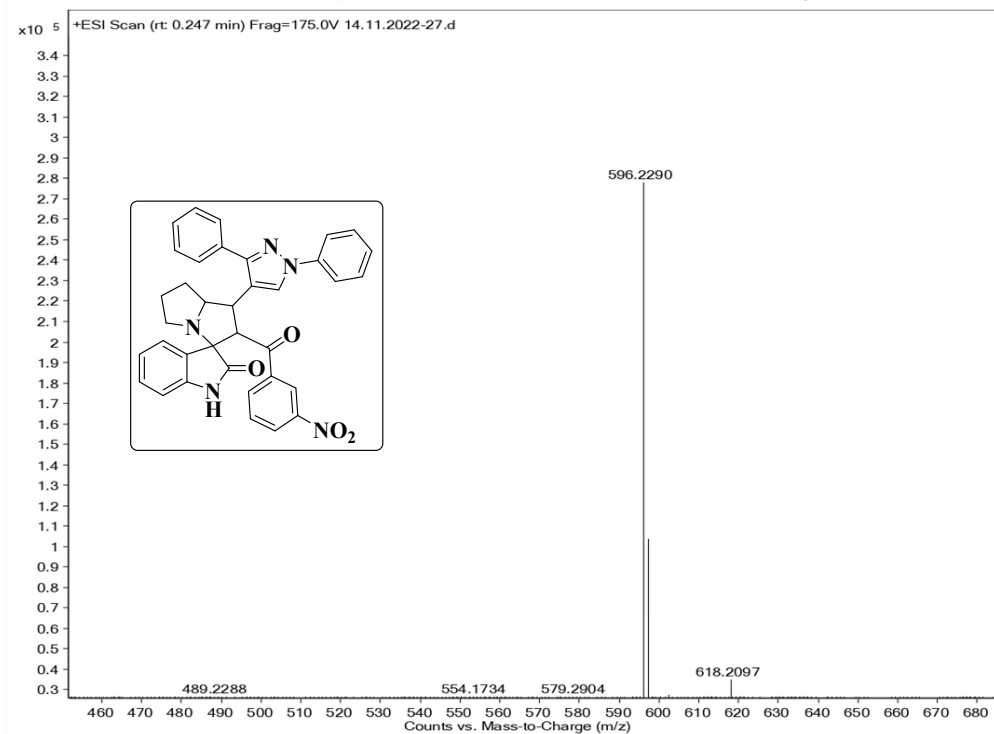

**Mass spectrum of the compound 4f**

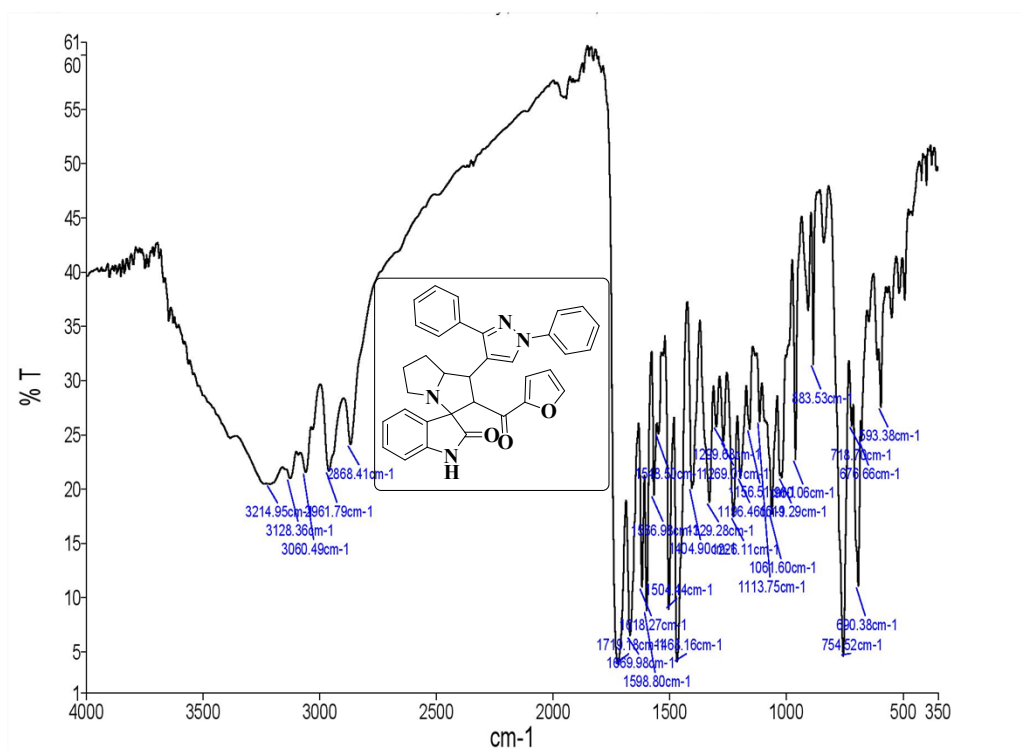

**FT-IR Spectrum of the compound 4g**

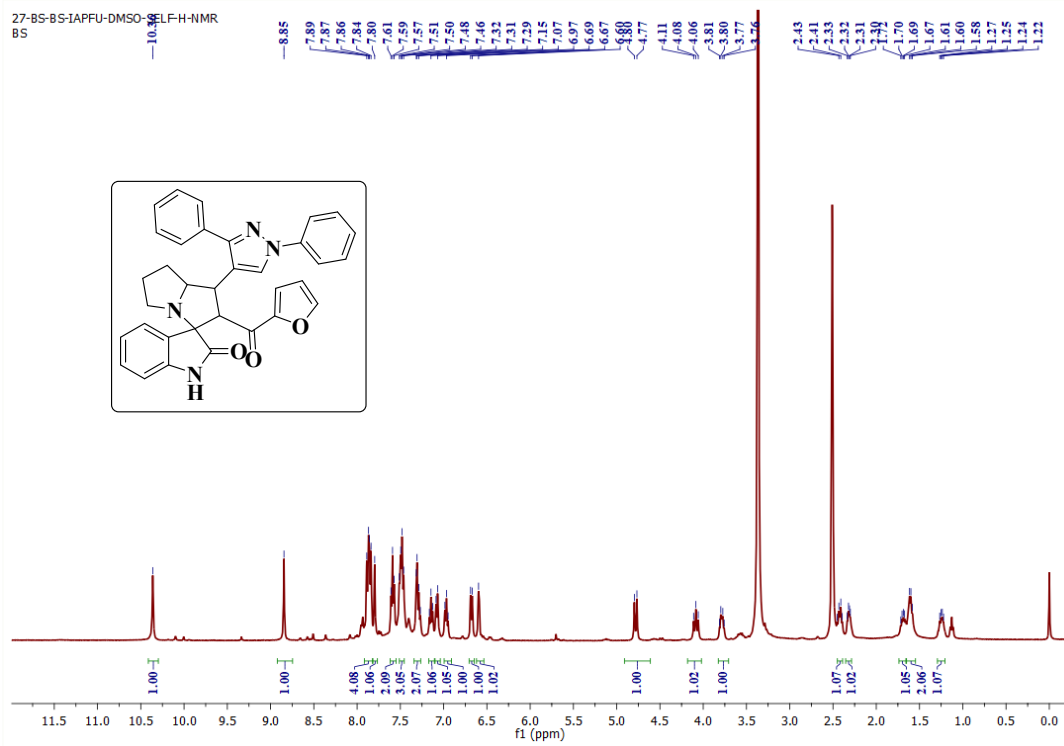

**<sup>1</sup>H NMR Spectrum of the compound 4g**

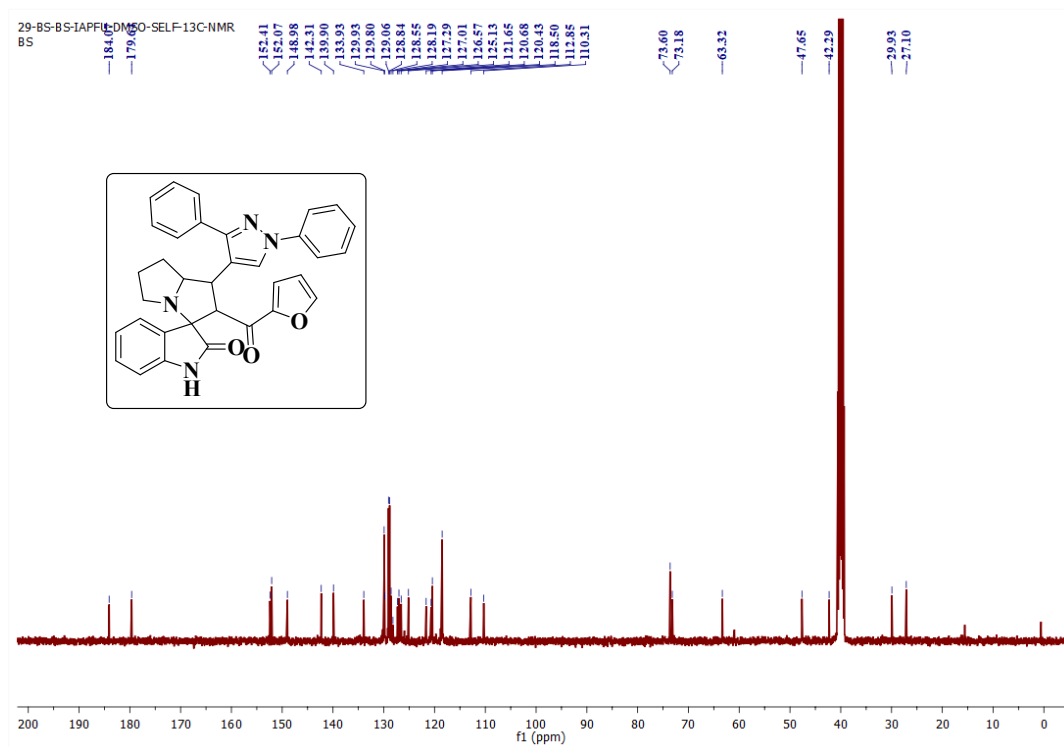

**<sup>13</sup>C NMR Spectrum of the compound 4g**

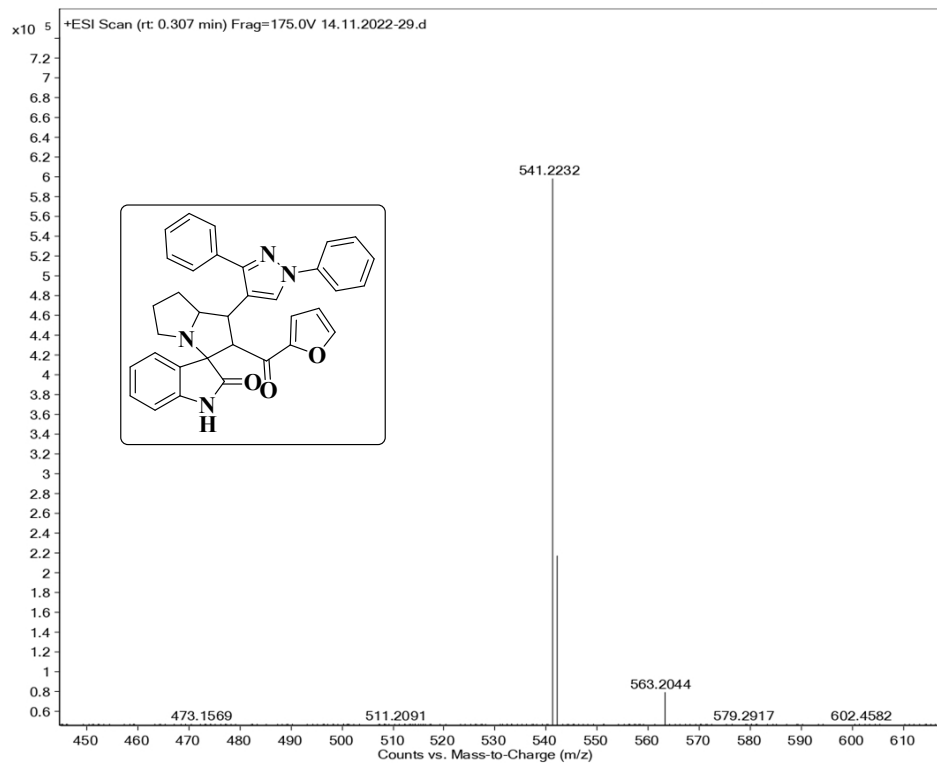

**Mass spectrum of the compound 4g**

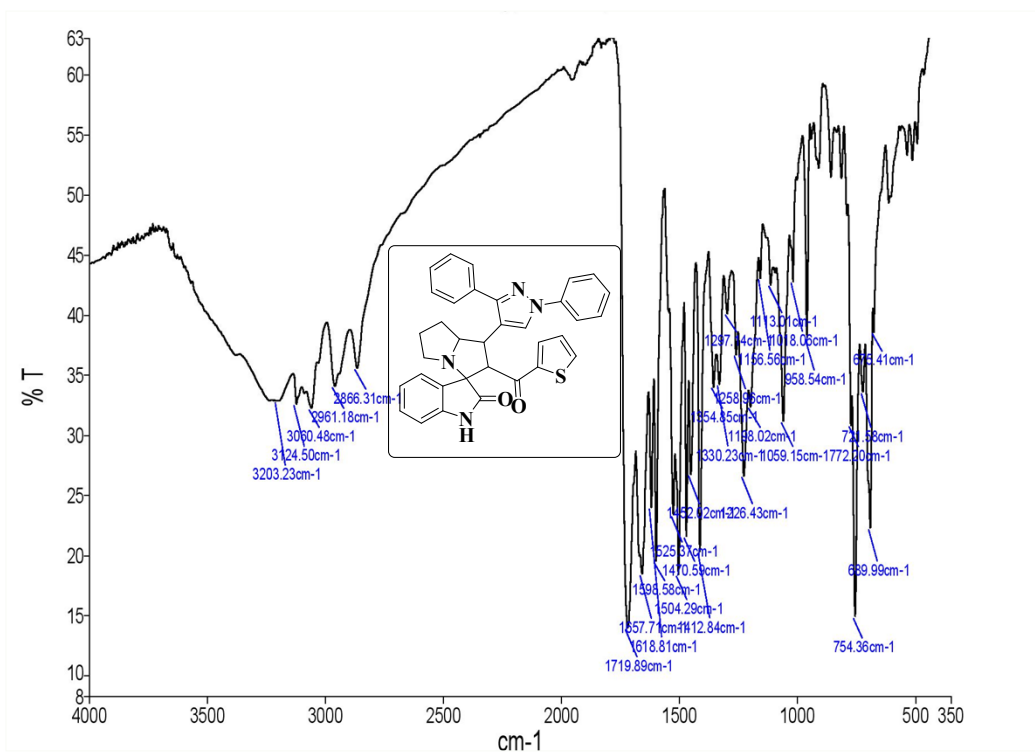

**FT-IR Spectrum of the compound 4h**

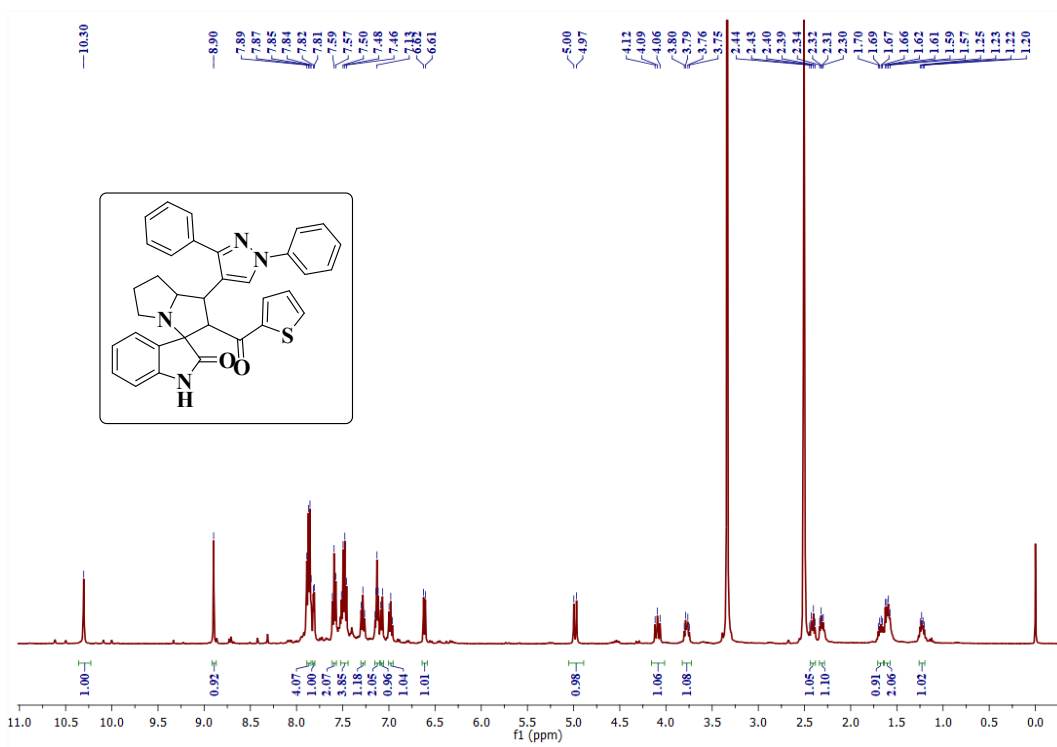

**<sup>1</sup>H NMR Spectrum of the compound 4h**

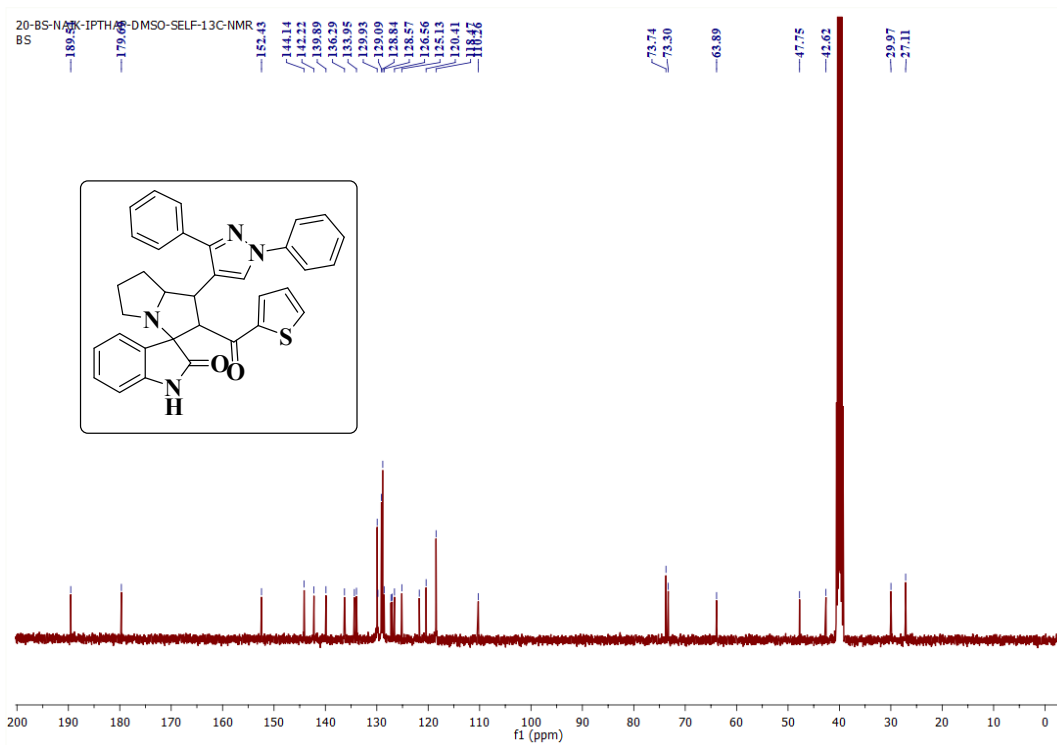

**<sup>13</sup>C NMR Spectrum of the compound 4h**



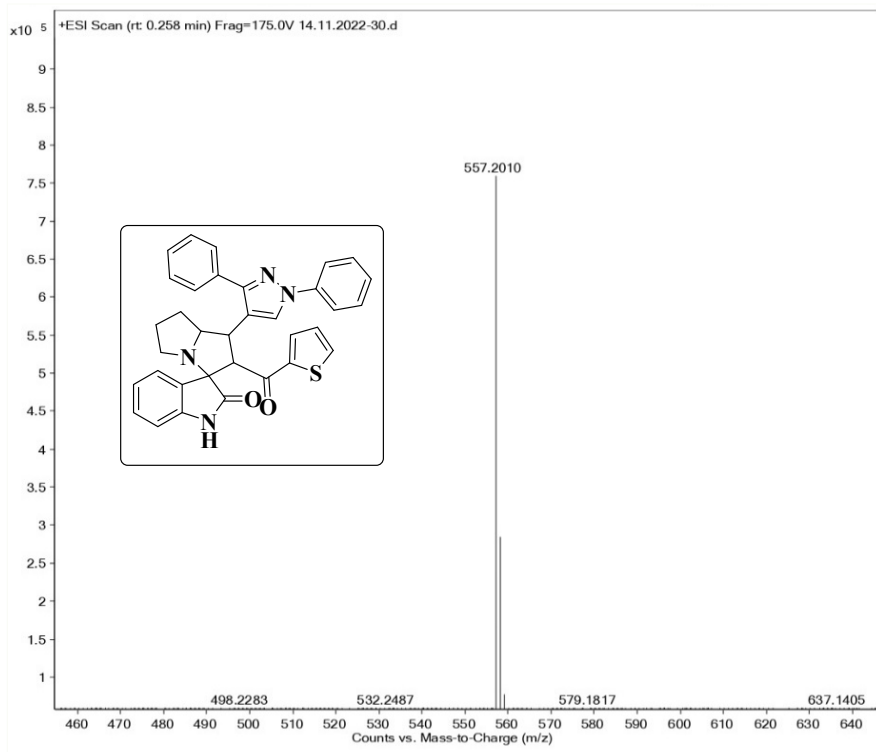

**Mass spectrum of the compound 4h**

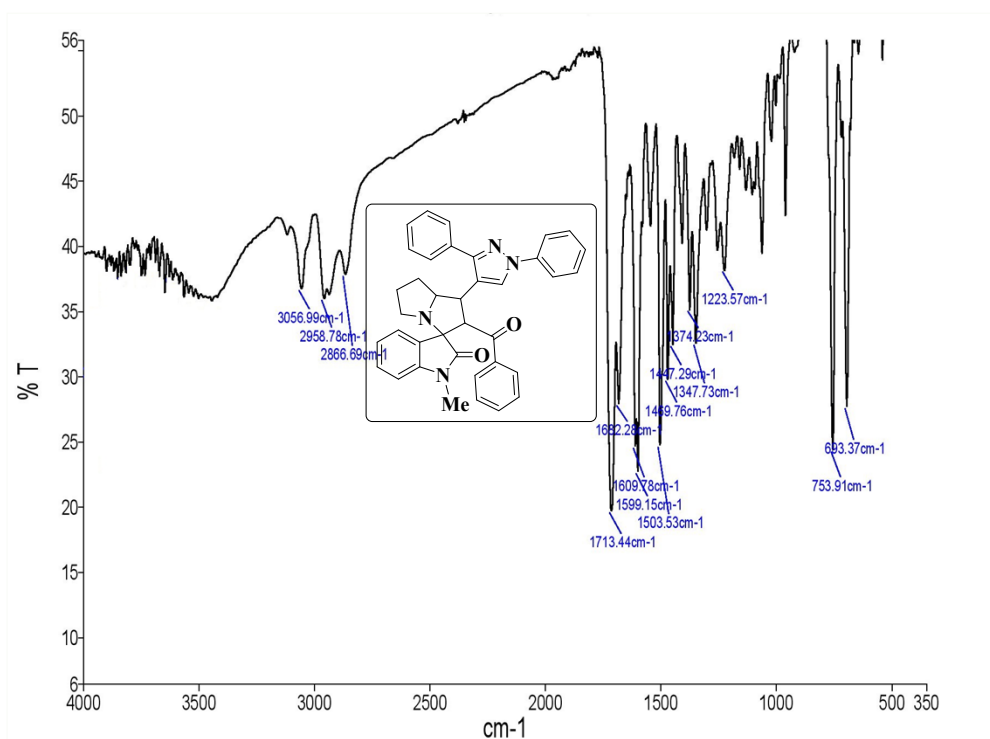

**FT-IR Spectrum of the compound 4i**

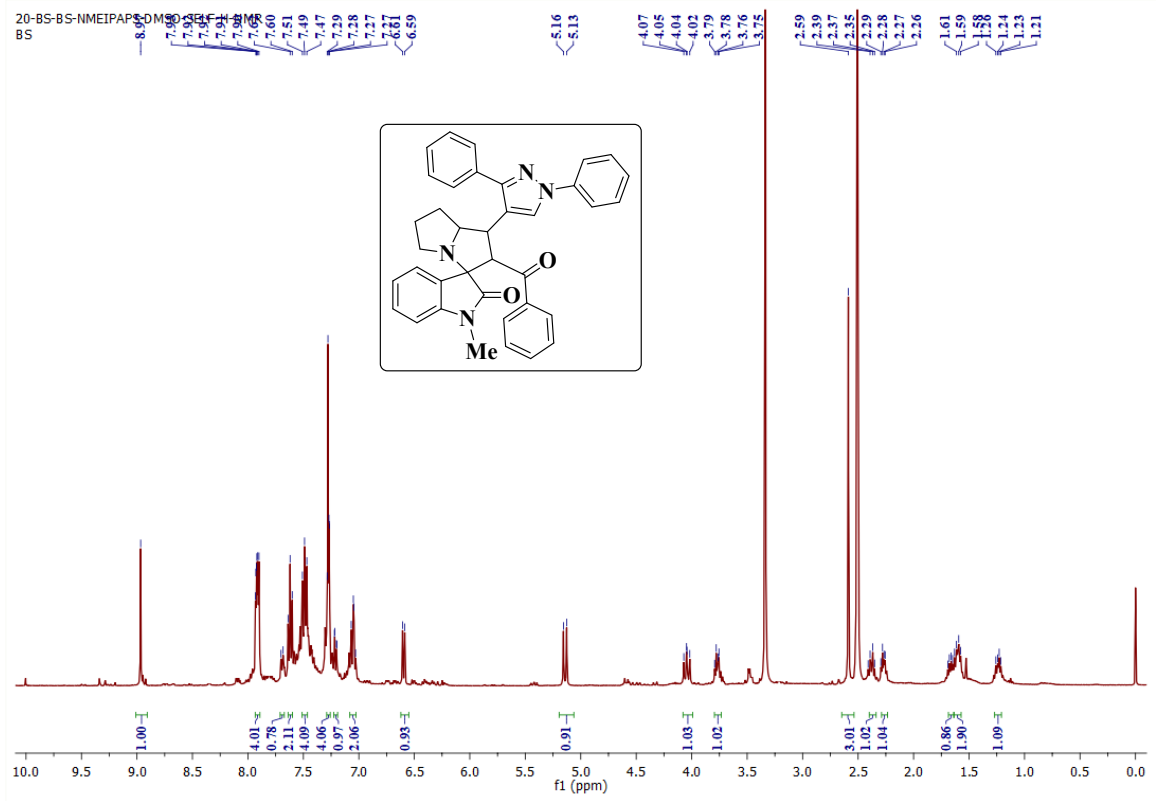

**<sup>1</sup>H NMR Spectrum of the compound 4i**

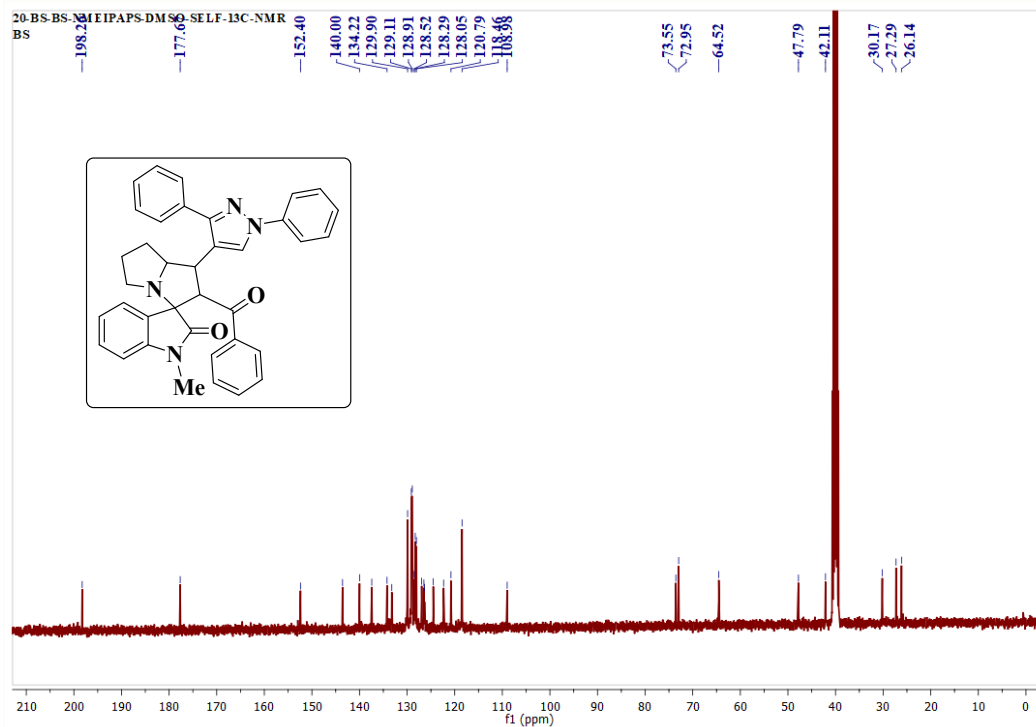

**<sup>13</sup>C NMR Spectrum of the compound 4i**

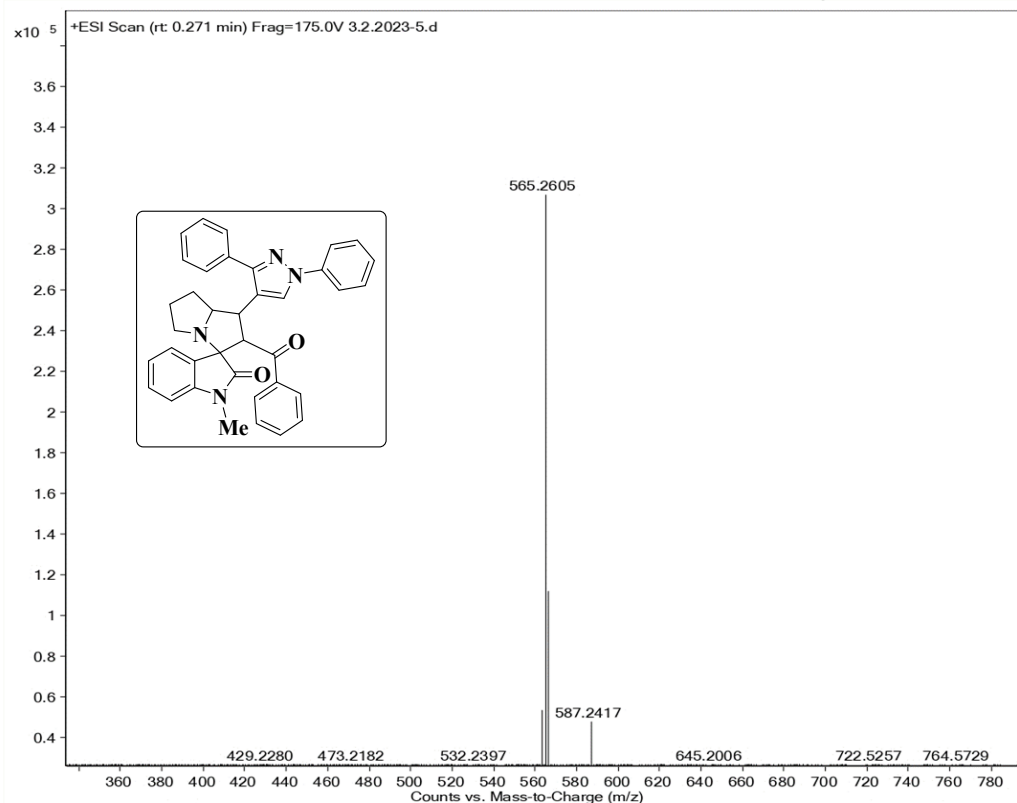

**Mass spectrum of the compound 4i**

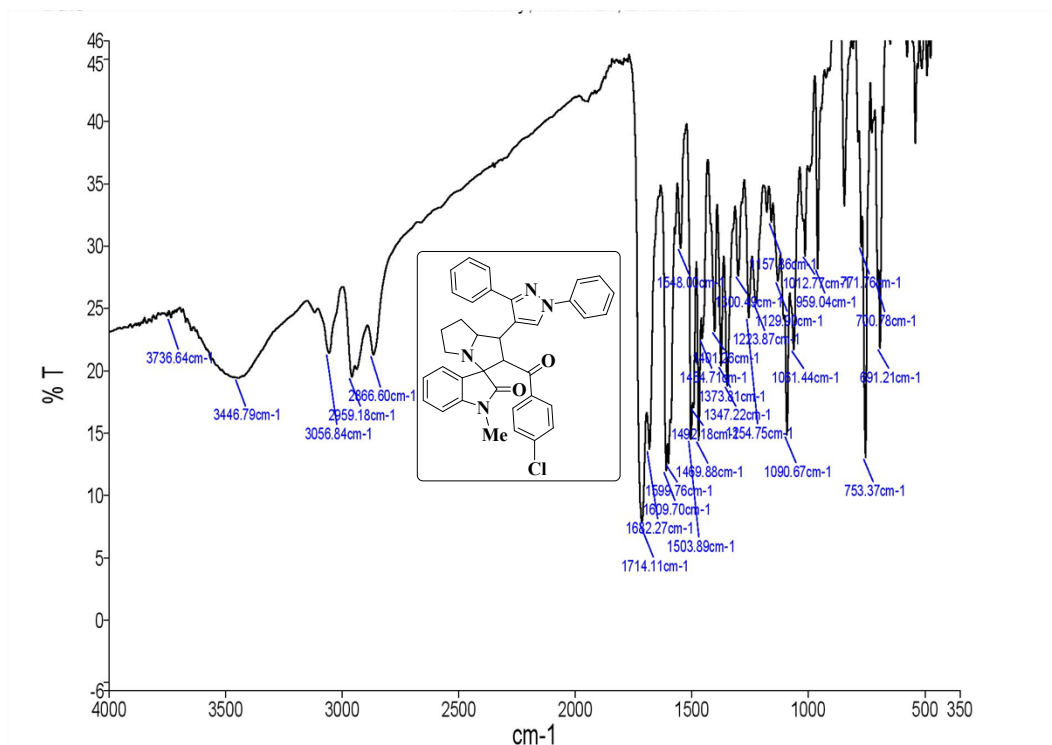

**FT-IR Spectrum of the compound 4j**

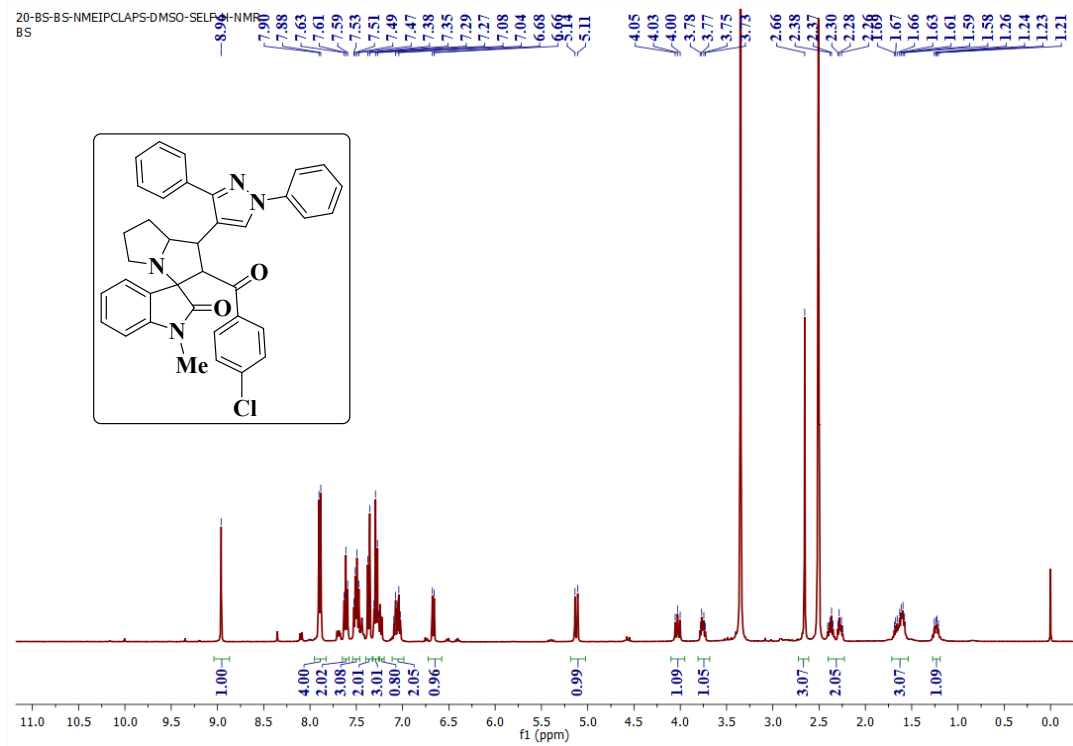

<sup>1</sup>H NMR Spectrum of the compound 4j

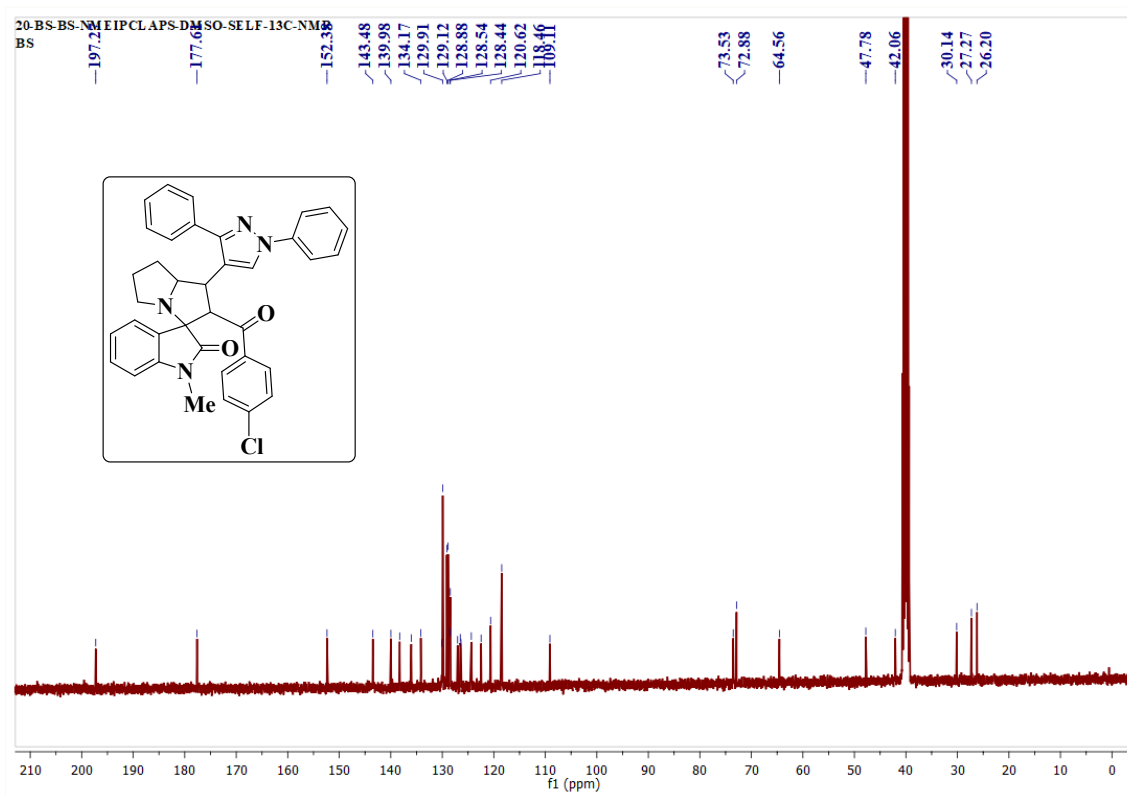

<sup>13</sup>C NMR Spectrum of the compound 4j

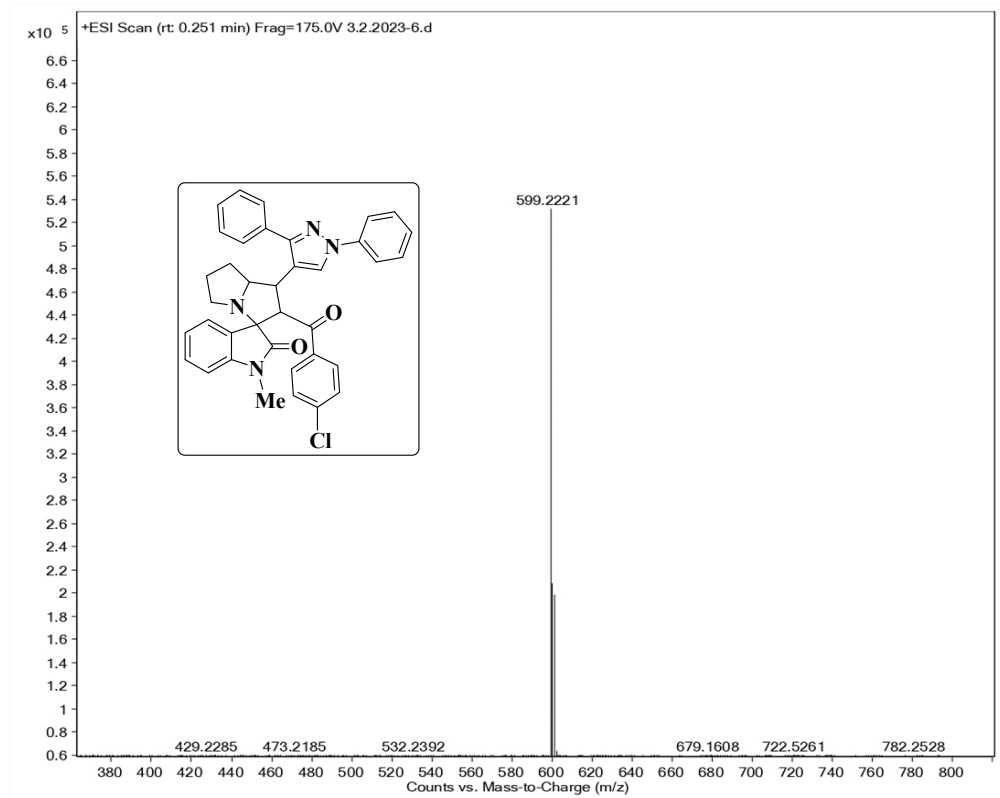

**Mass spectrum of the compound 4j**

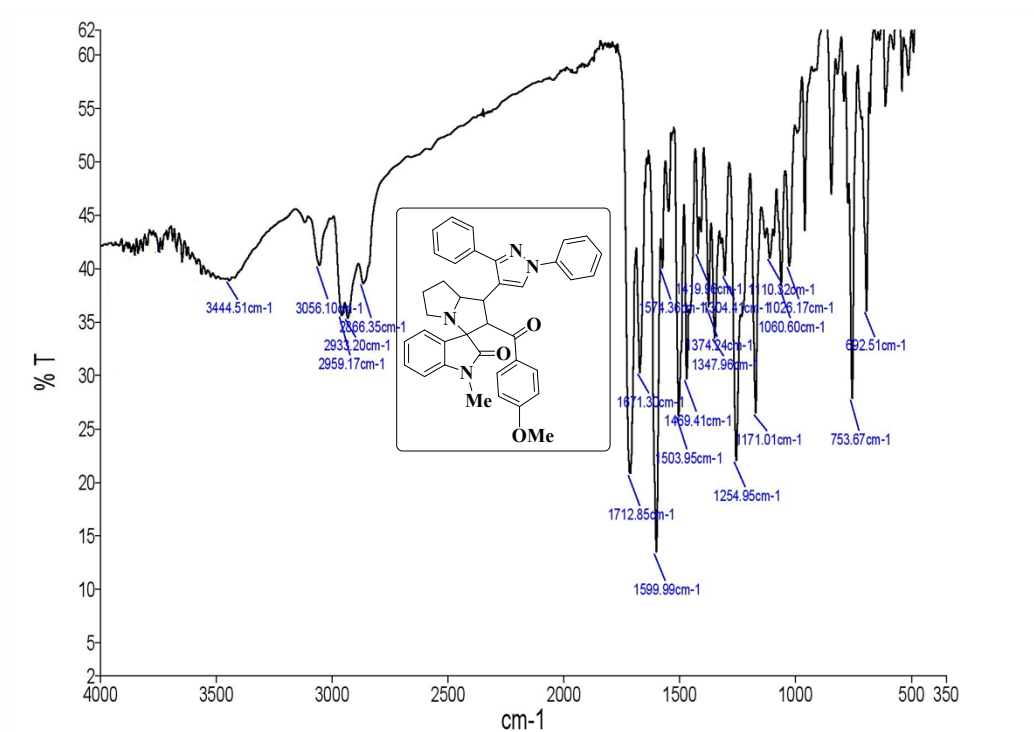

**FT-IR Spectrum of the compound 4k**

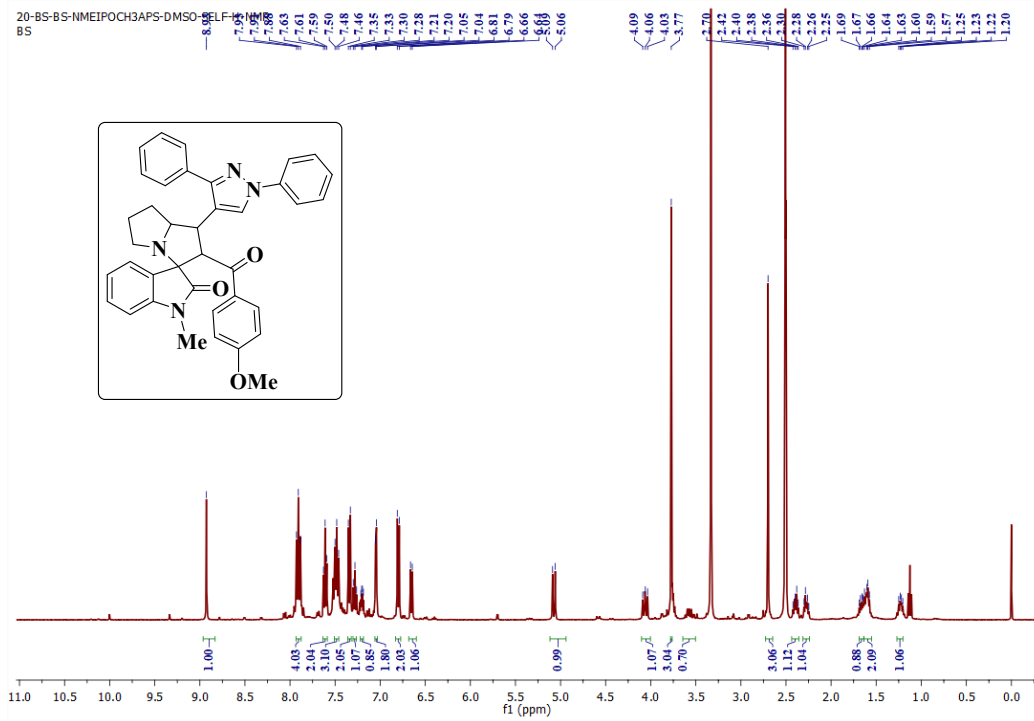

**<sup>1</sup>H NMR Spectrum of the compound 4k**

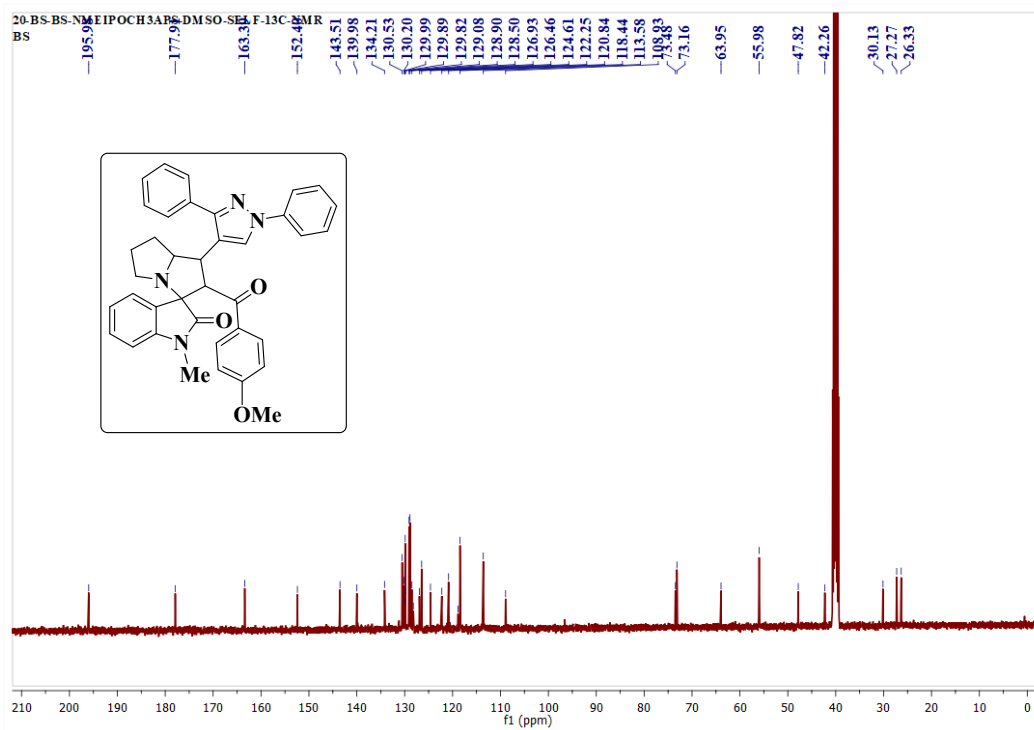

**<sup>13</sup>C NMR Spectrum of the compound 4k**

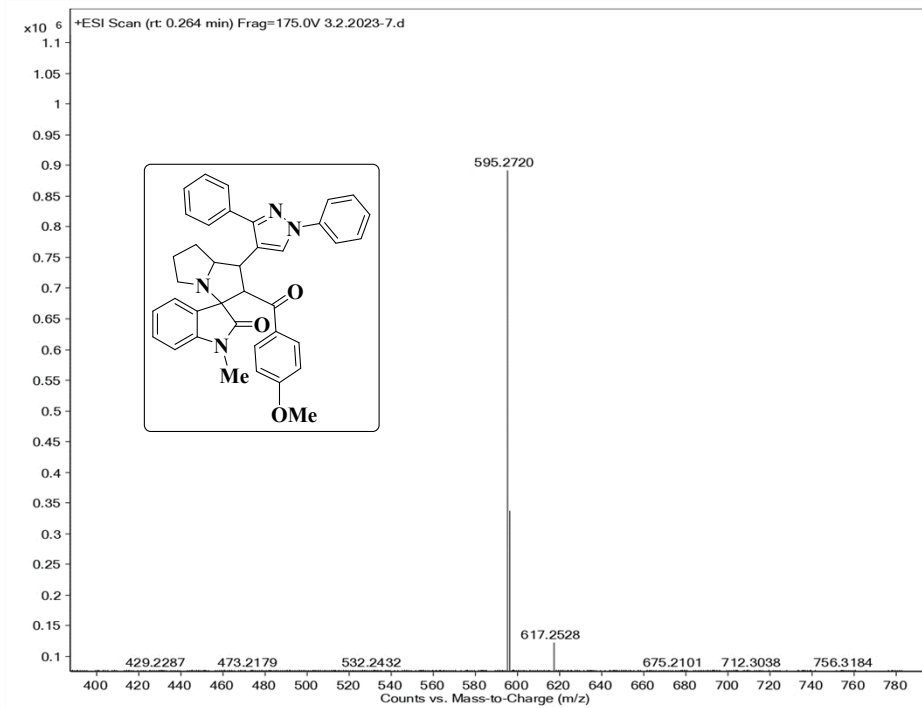

**Mass spectrum of the compound 4k**

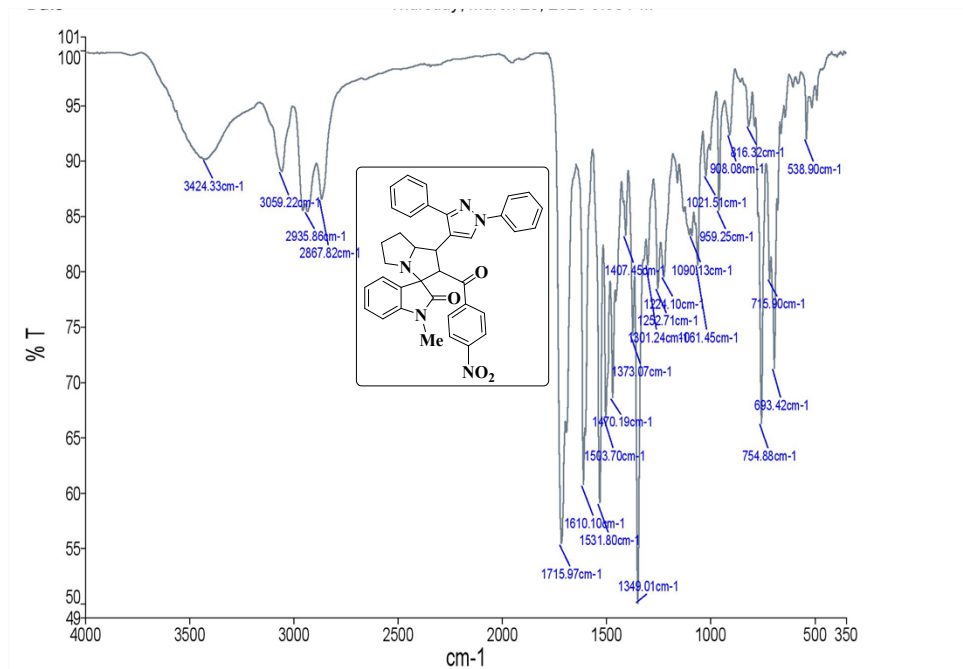

**FT-IR Spectrum of the compound 4l**

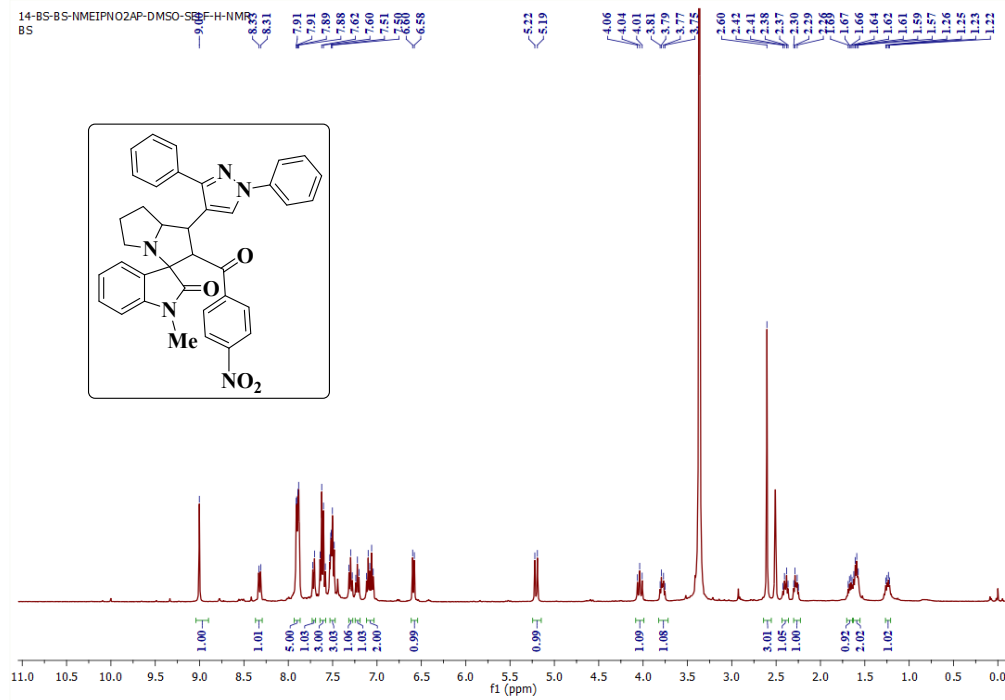

**<sup>1</sup>H NMR Spectrum of the compound 4I**

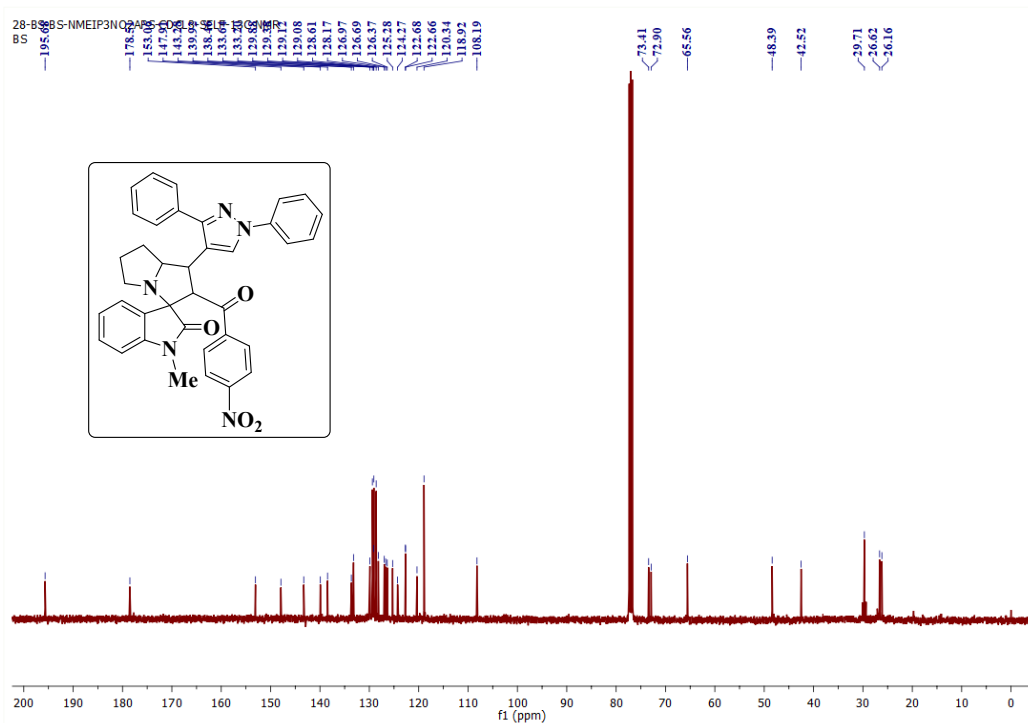

**<sup>13</sup>C NMR Spectrum of the compound 4I**



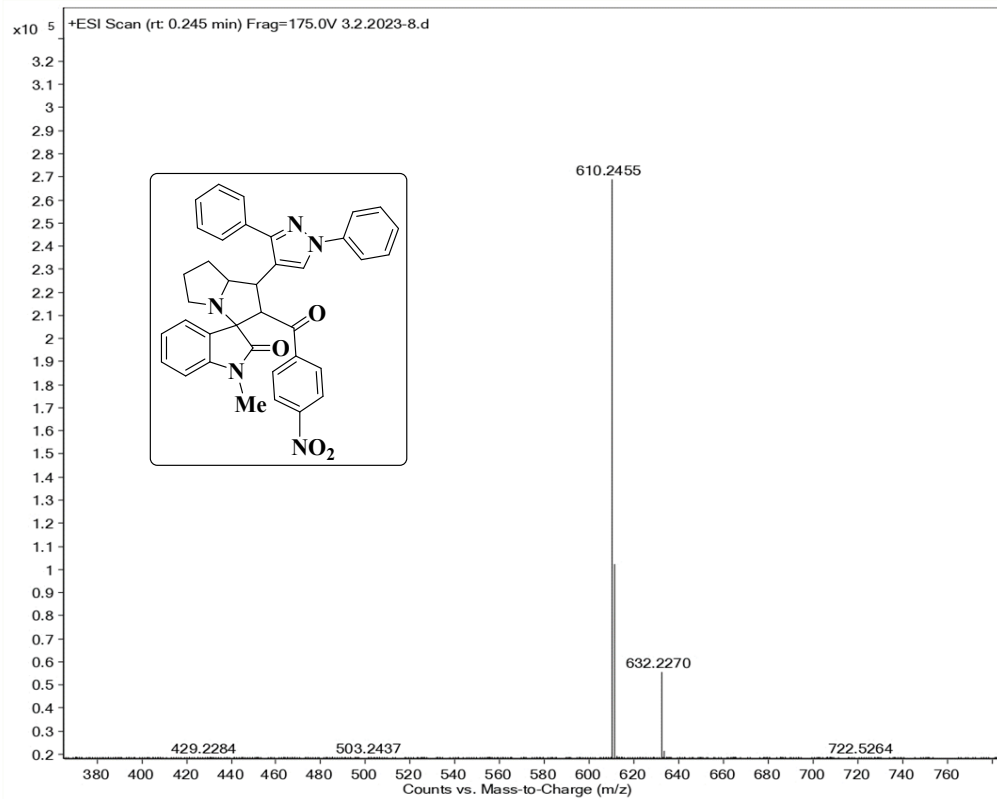

**Mass spectrum of the compound 4l**

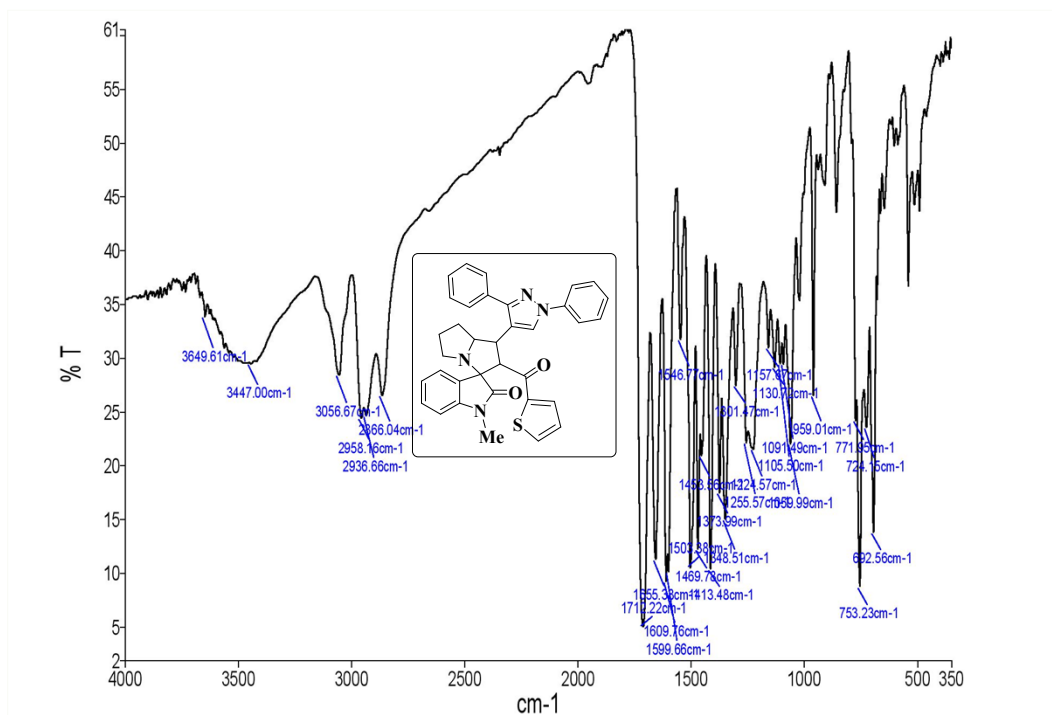

**FT-IR Spectrum of the compound 4m**

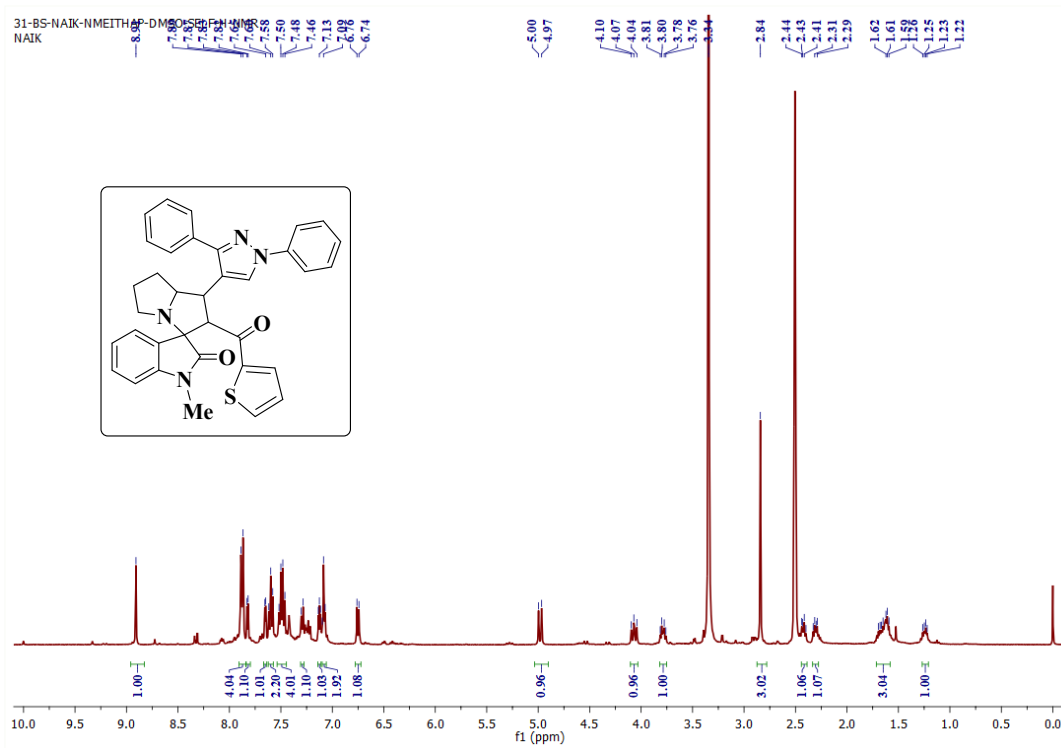

**<sup>1</sup>H NMR Spectrum of the compound 4m**

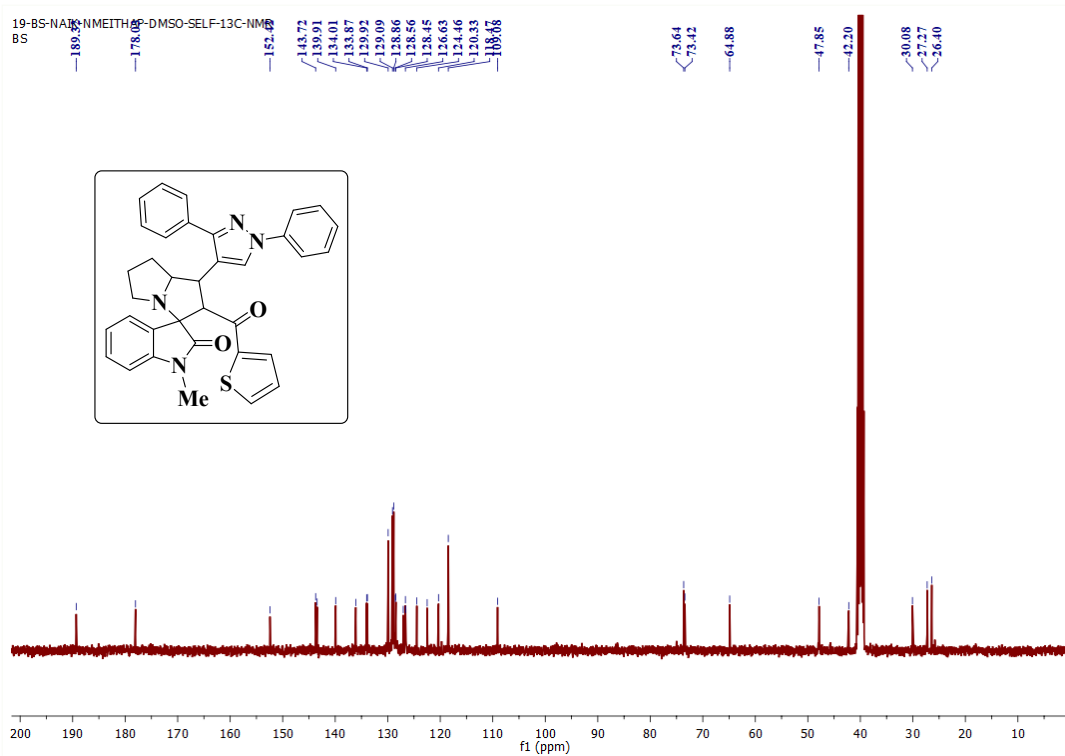

**<sup>13</sup>C NMR Spectrum of the compound 4m**

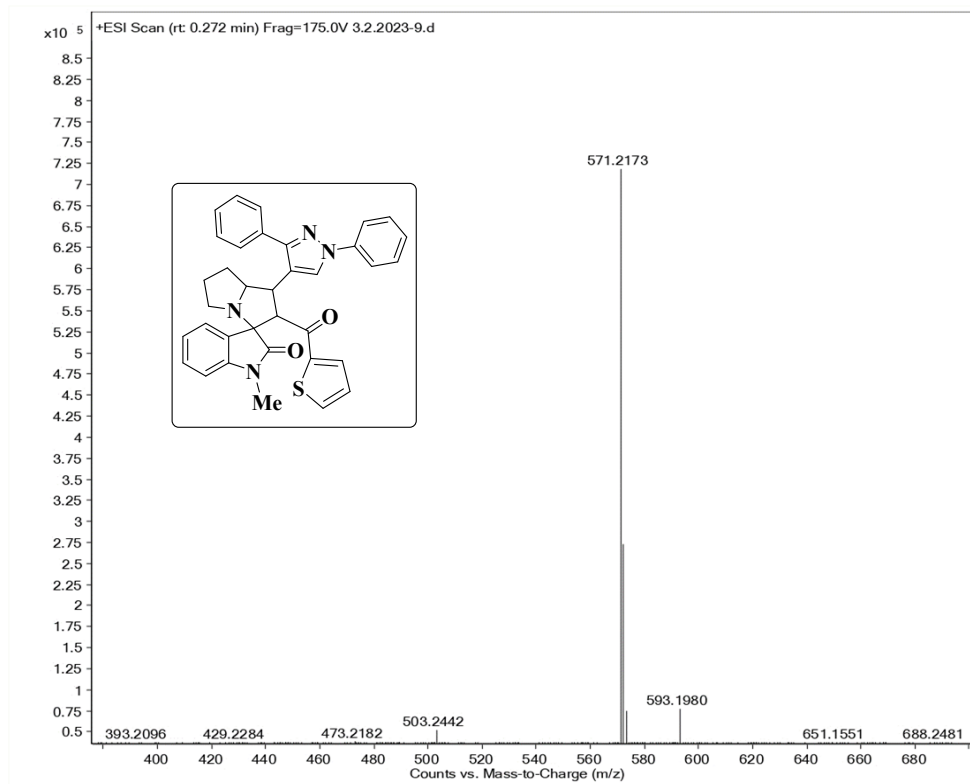

**Mass spectrum of the compound 4m**

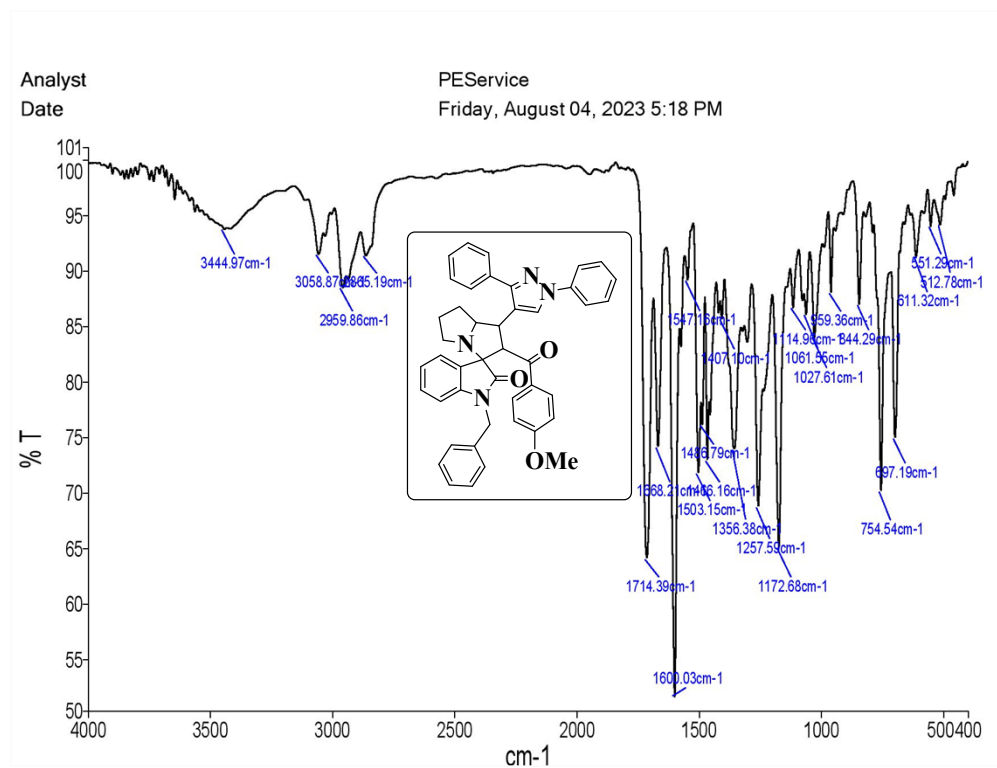

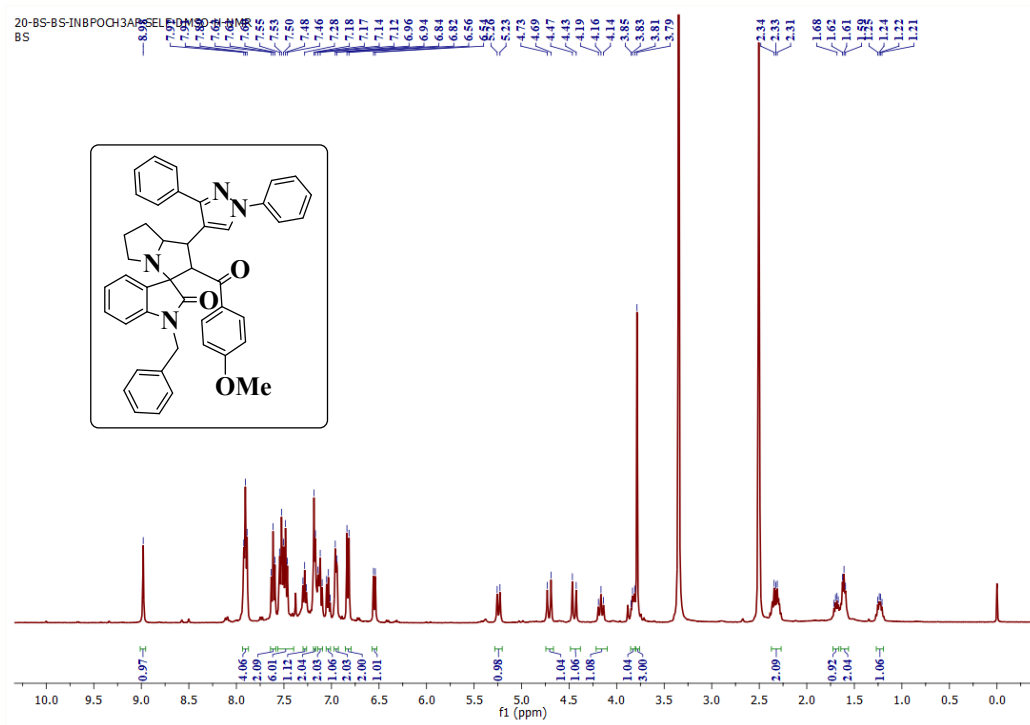

**<sup>1</sup>H NMR Spectrum of the compound 4n**

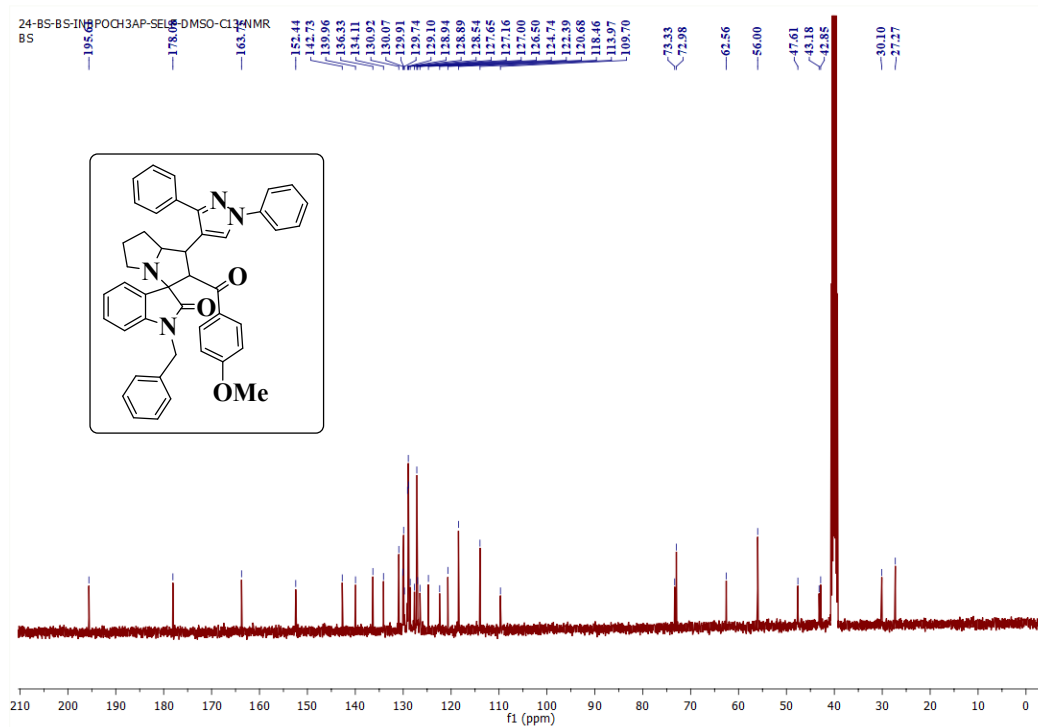

**<sup>13</sup>C NMR Spectrum of the compound 4n**

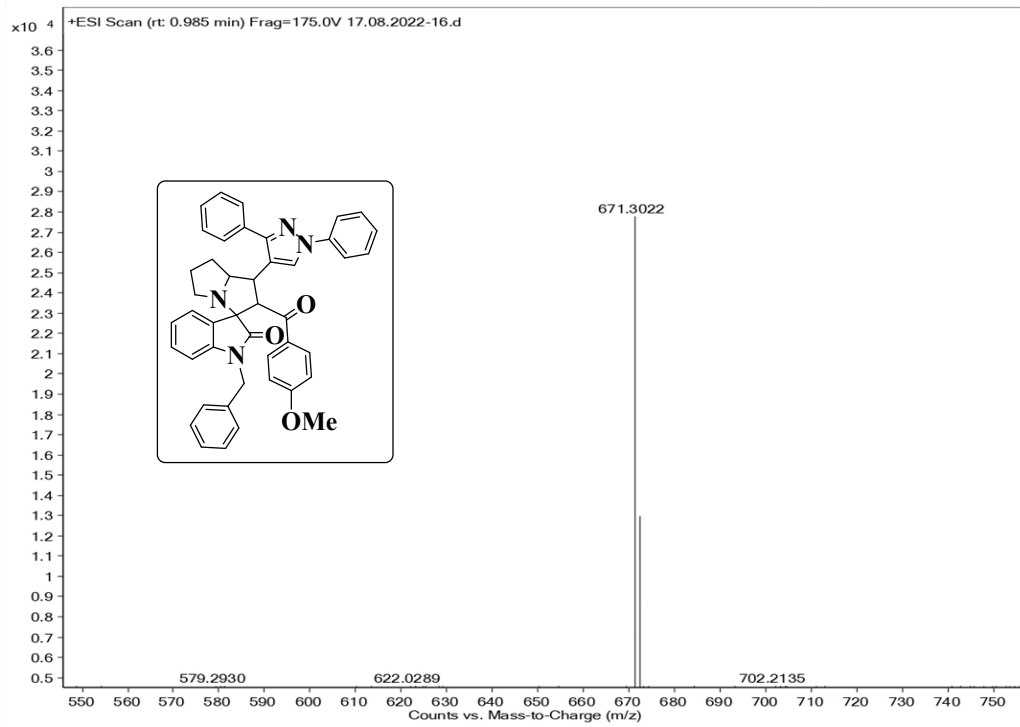

Mass spectrum of the compound 4n

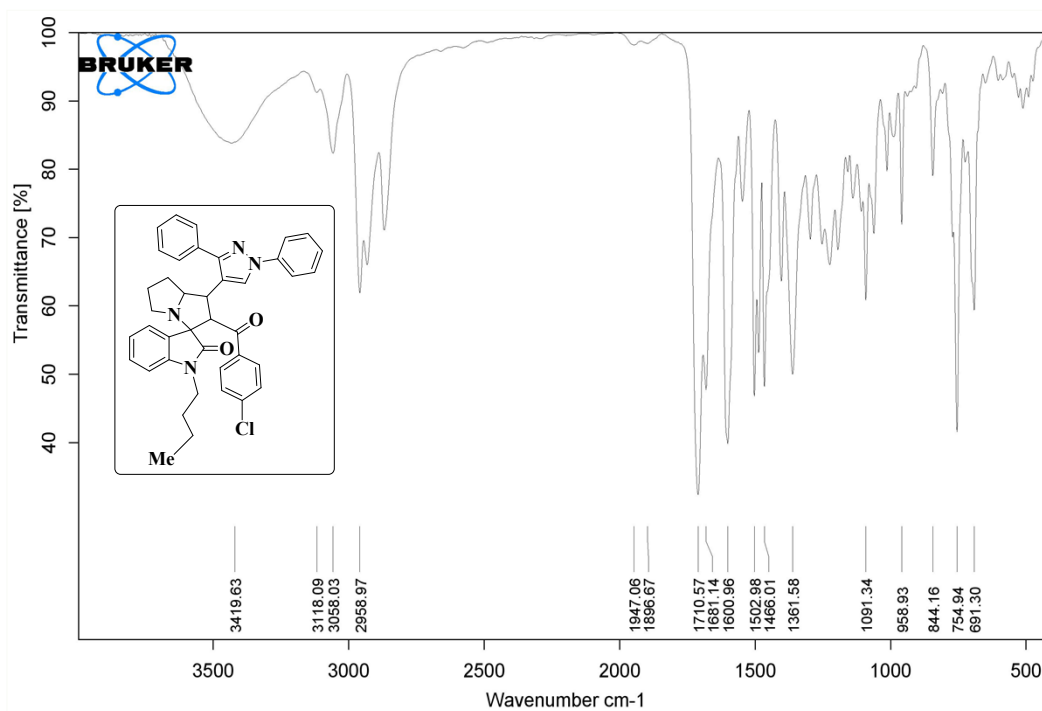

FT-IR Spectrum of the compound 4o

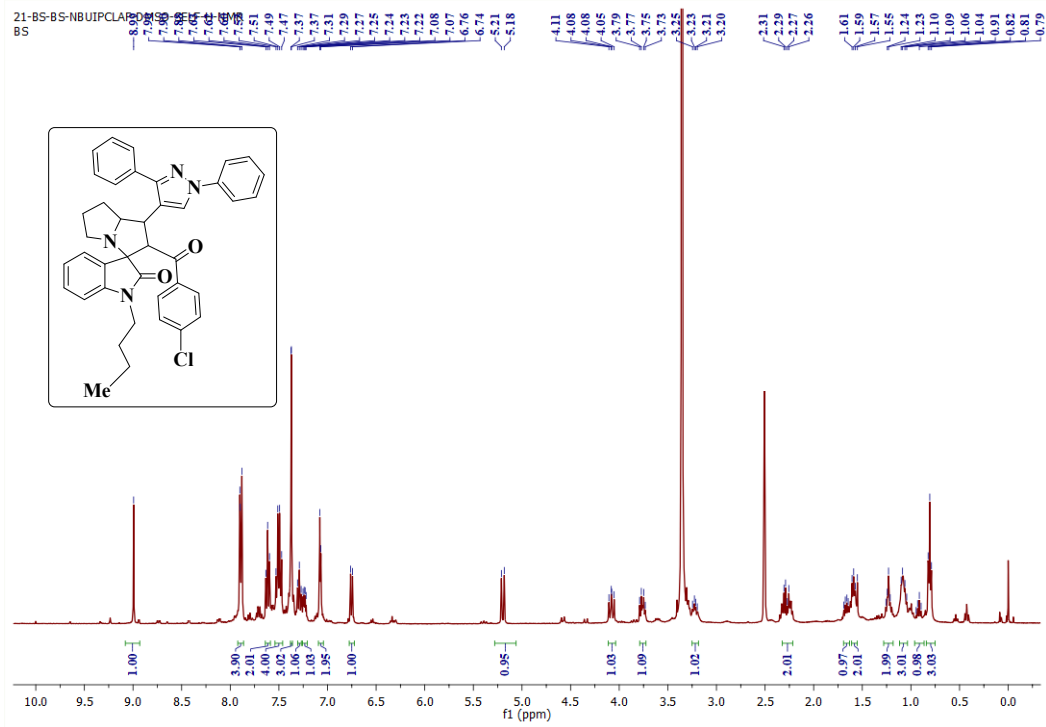

**<sup>1</sup>H NMR Spectrum of the compound 4o**

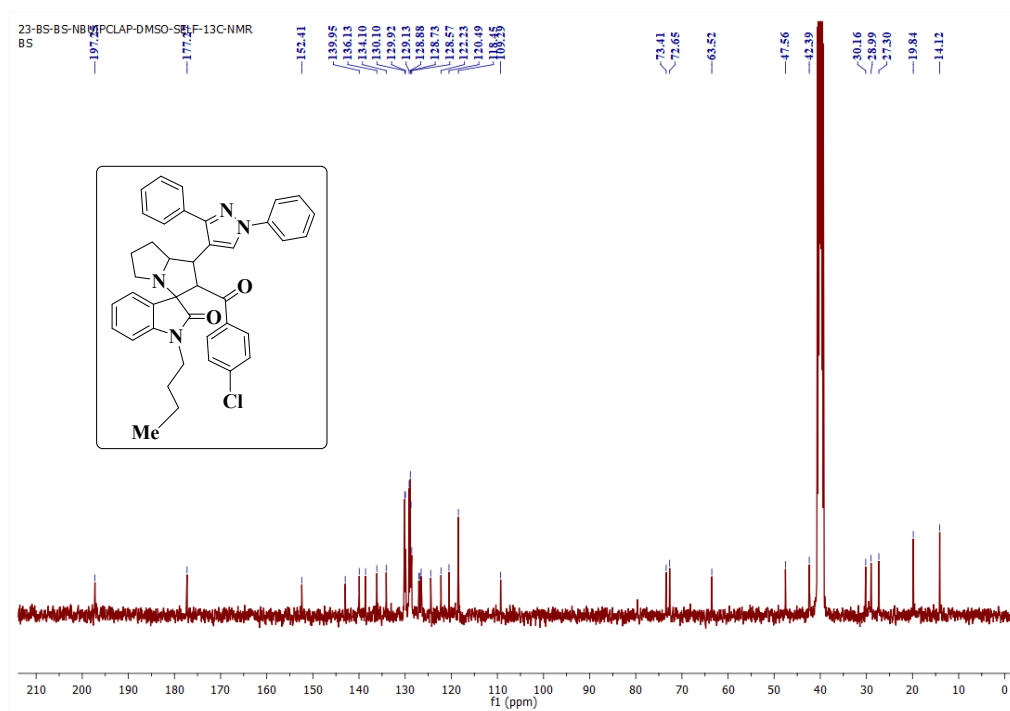

**<sup>13</sup>C NMR Spectrum of the compound 4o**

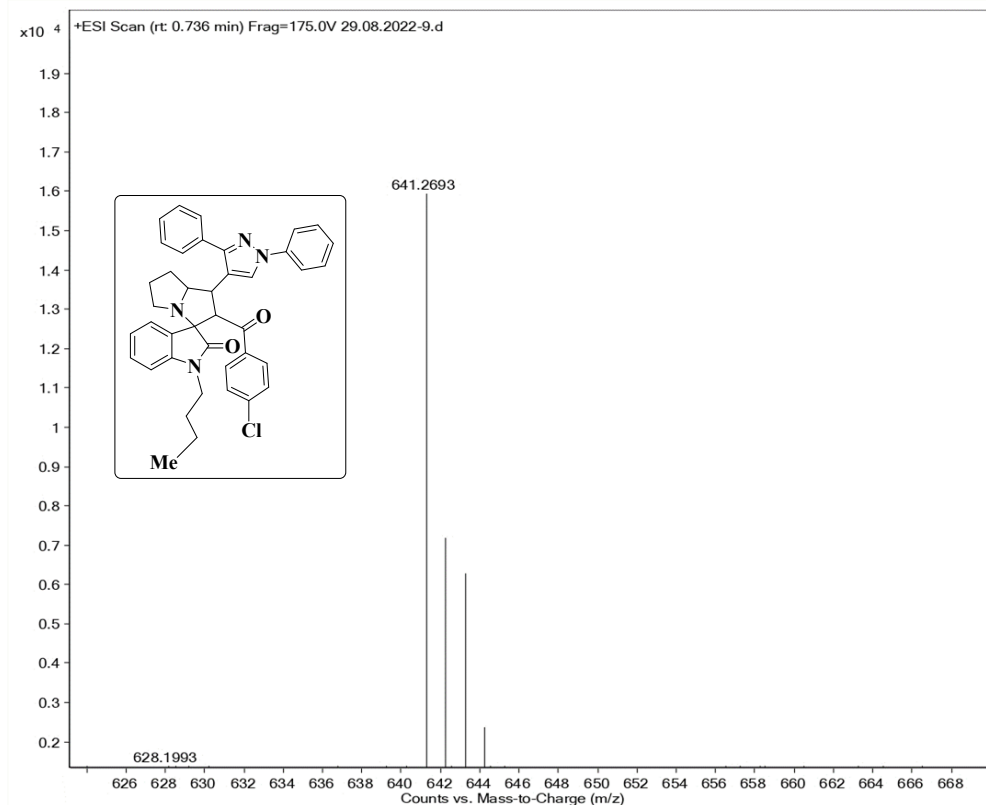

**Mass spectrum of the compound 4o**

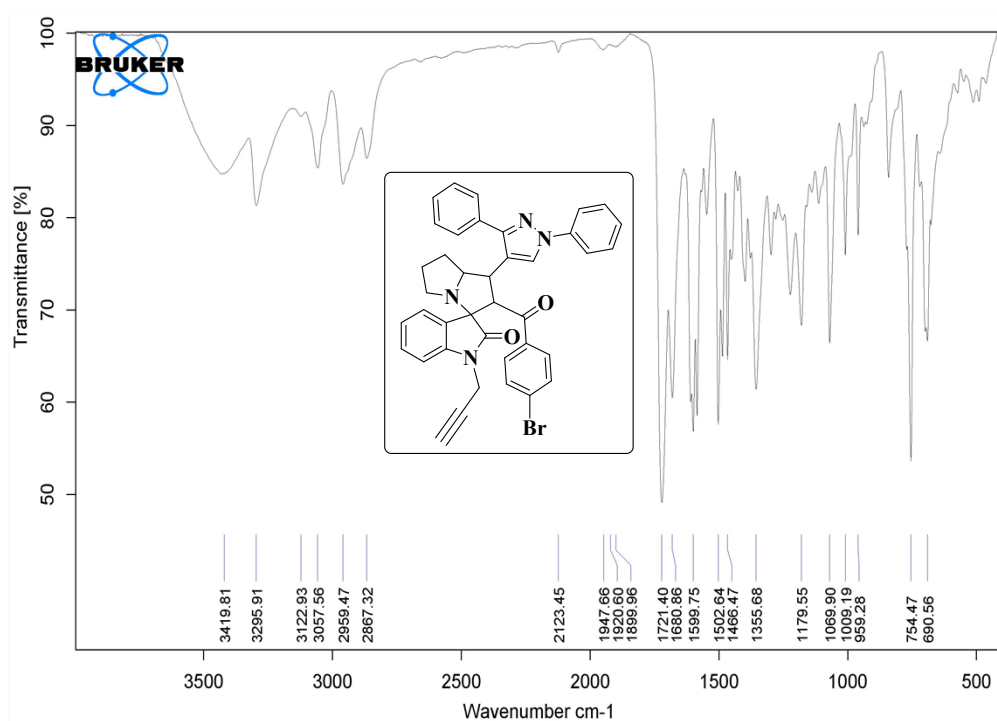

**FT-IR Spectrum of the compound 4p**

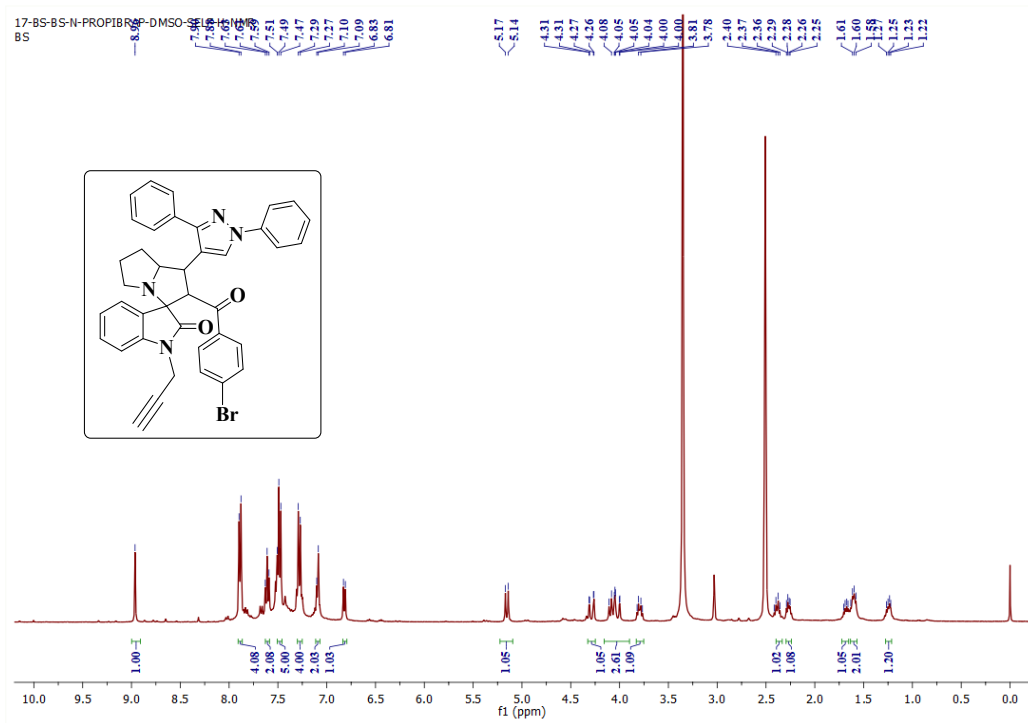

**<sup>1</sup>H NMR Spectrum of the compound 4p**

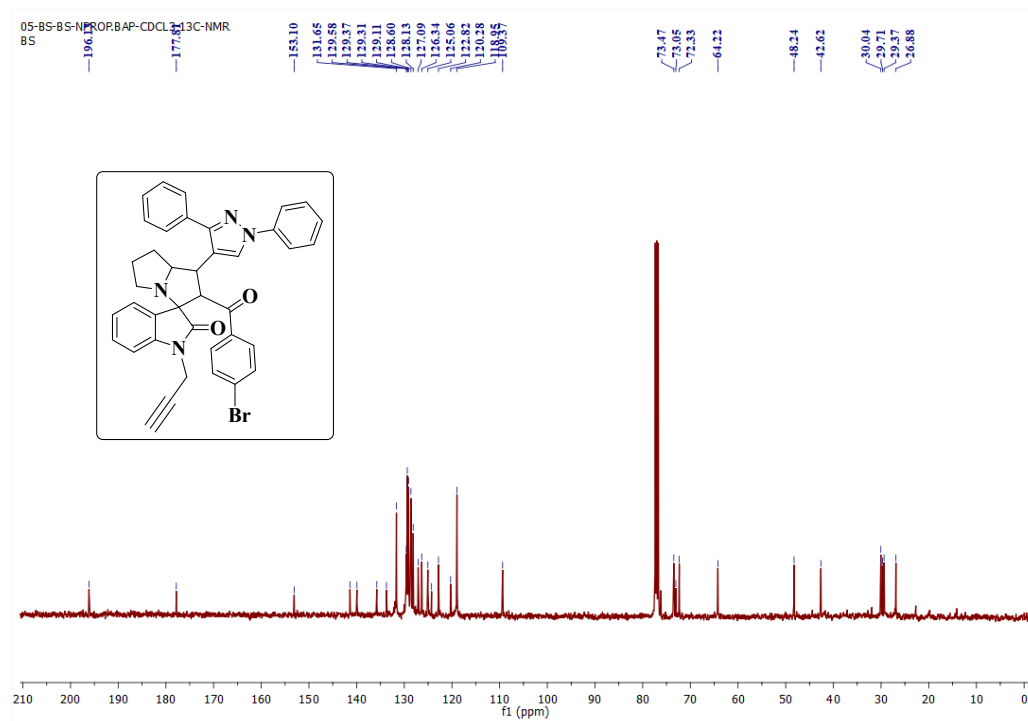

**<sup>13</sup>C NMR Spectrum of the compound 4p**



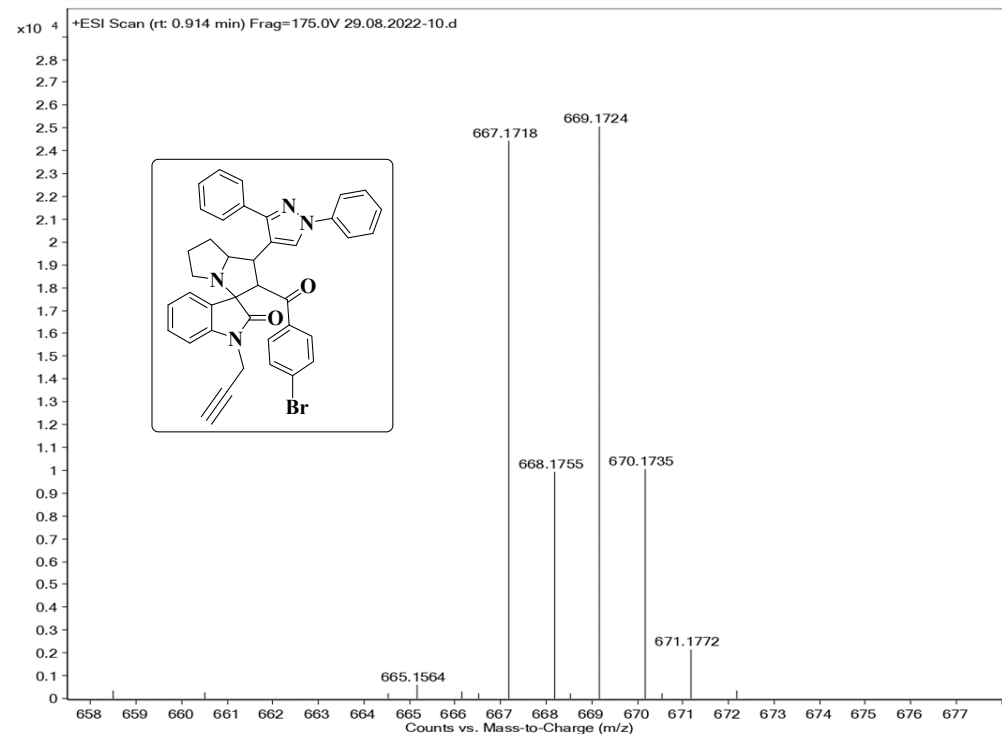

**Mass spectrum of the compound 4p**

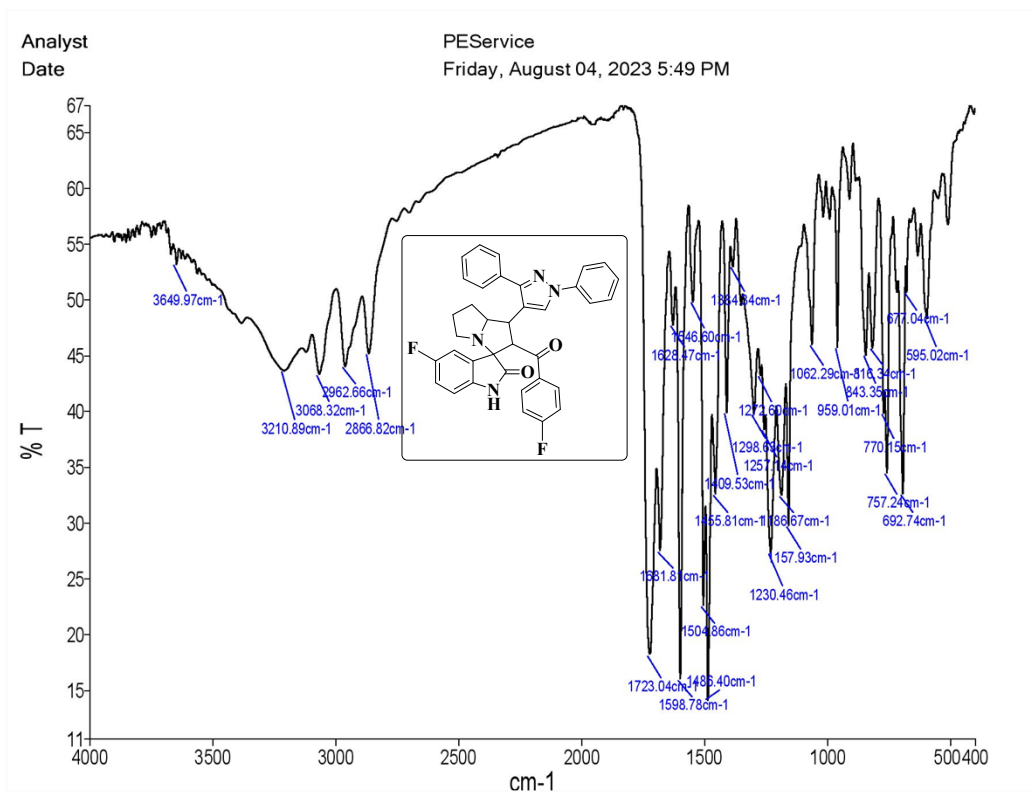

**FT-IR Spectrum of the compound 4q**

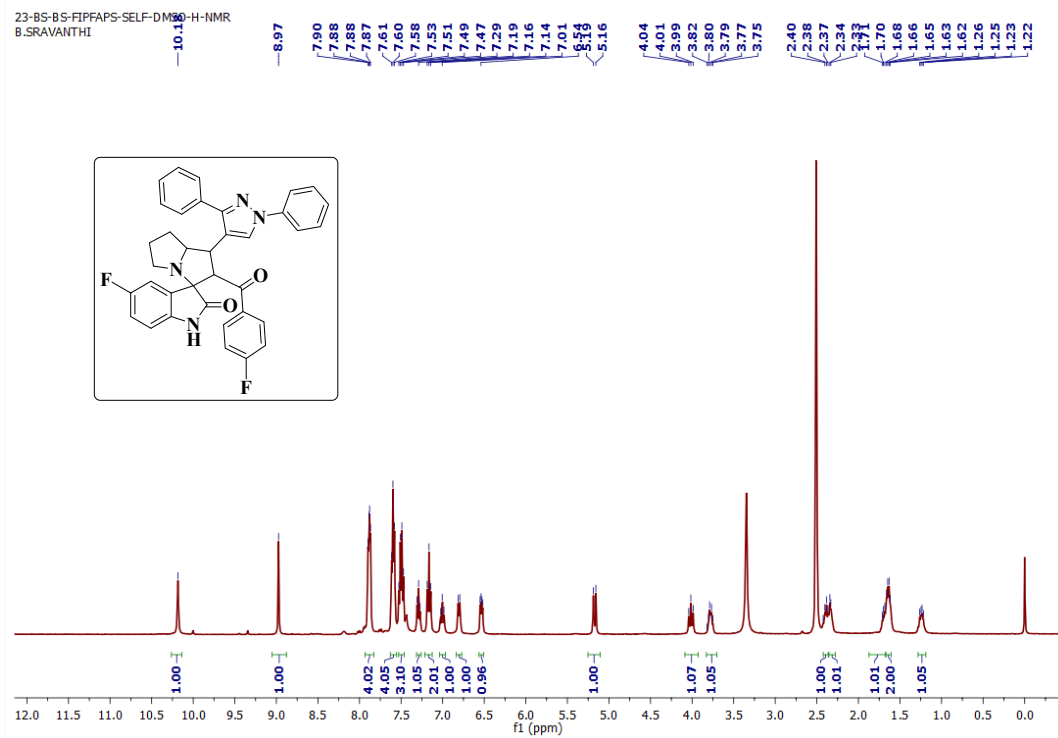

**<sup>1</sup>H NMR Spectrum of the compound 4q**

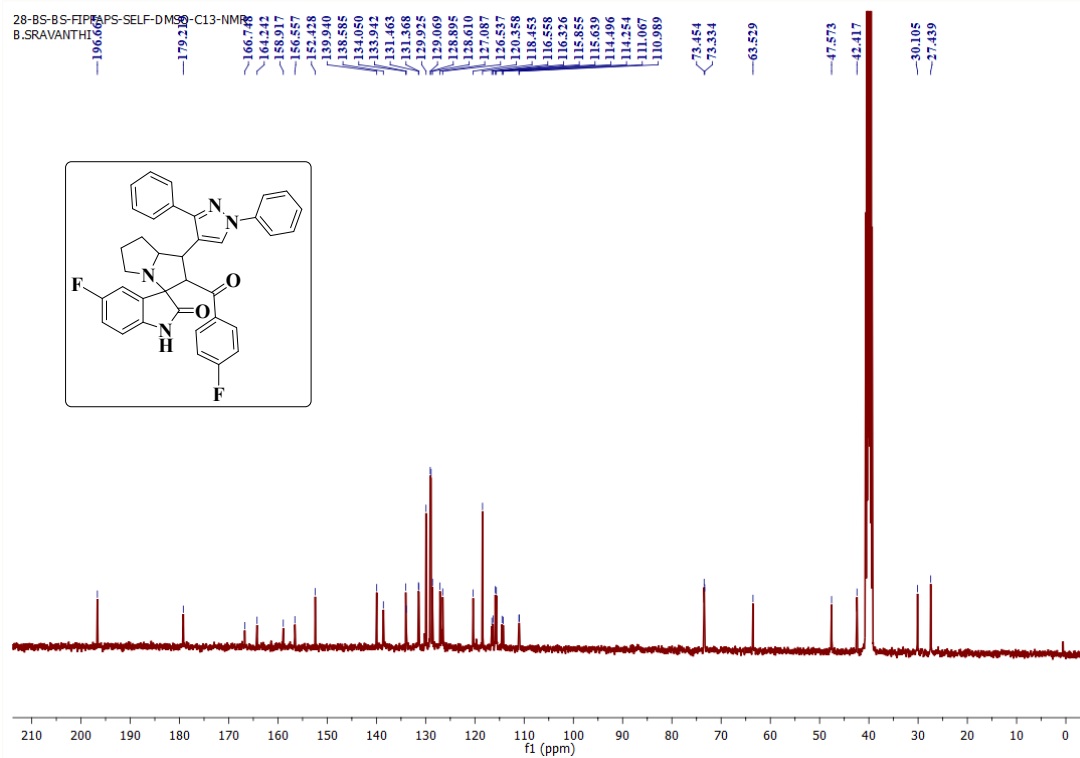

**<sup>13</sup>C NMR Spectrum of the compound 4q**

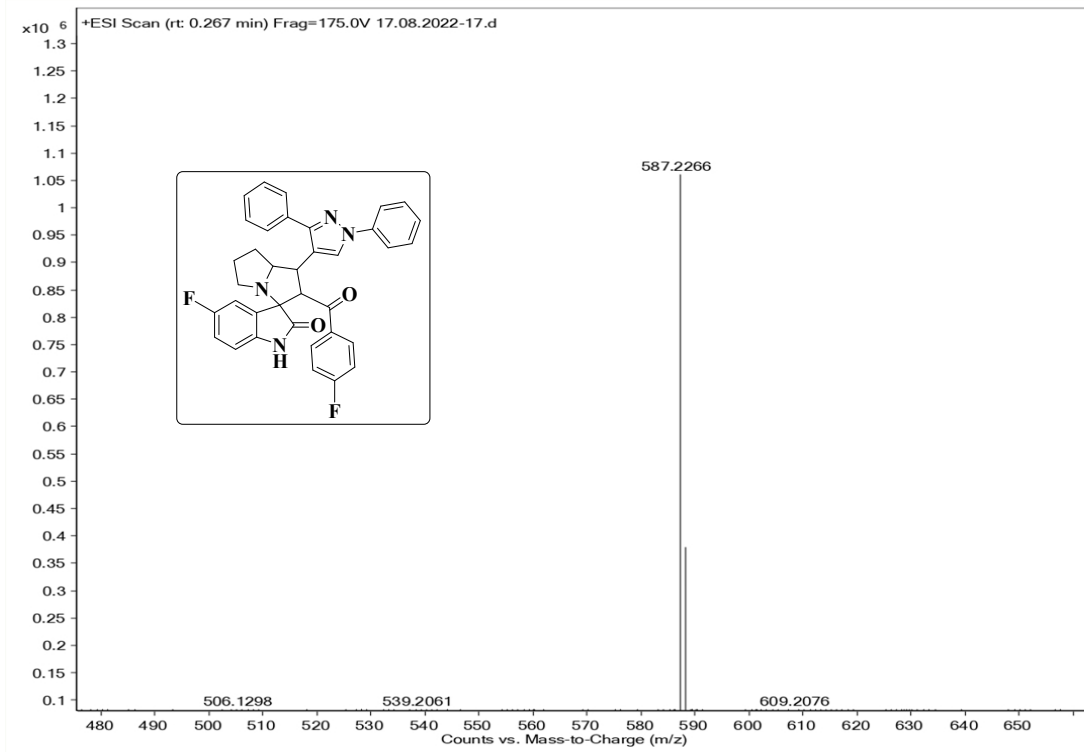

**Mass spectrum of the compound 4q**

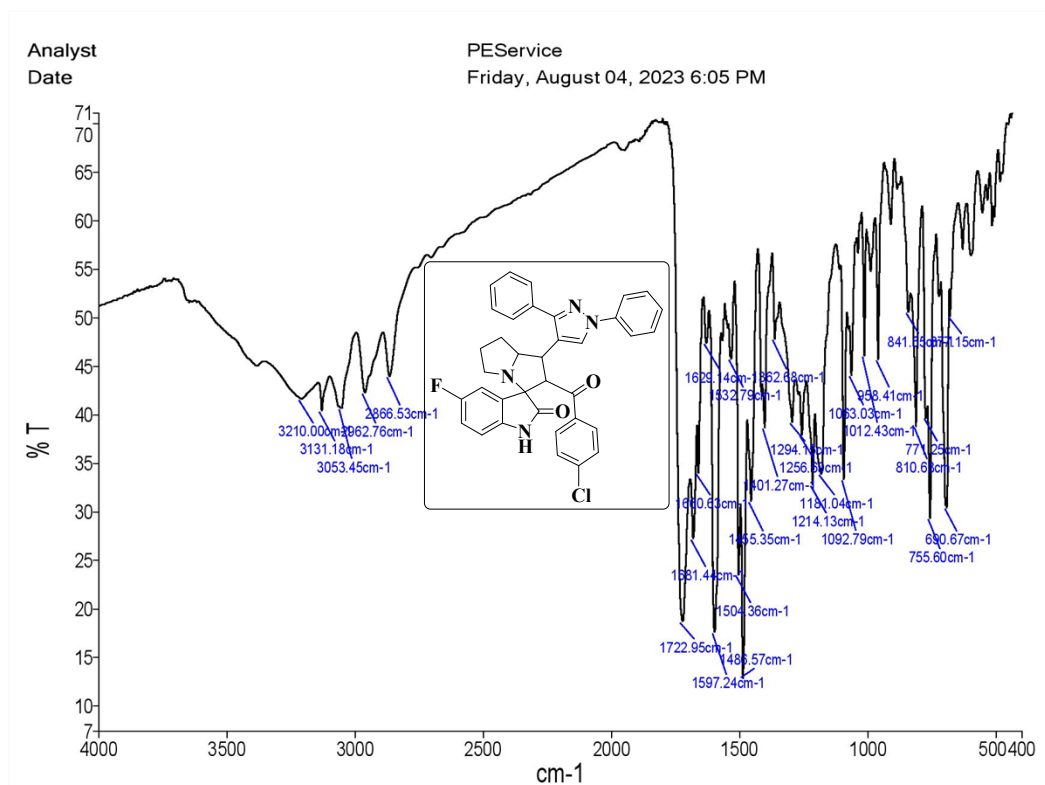

**FT-IR Spectrum of the compound 4r**

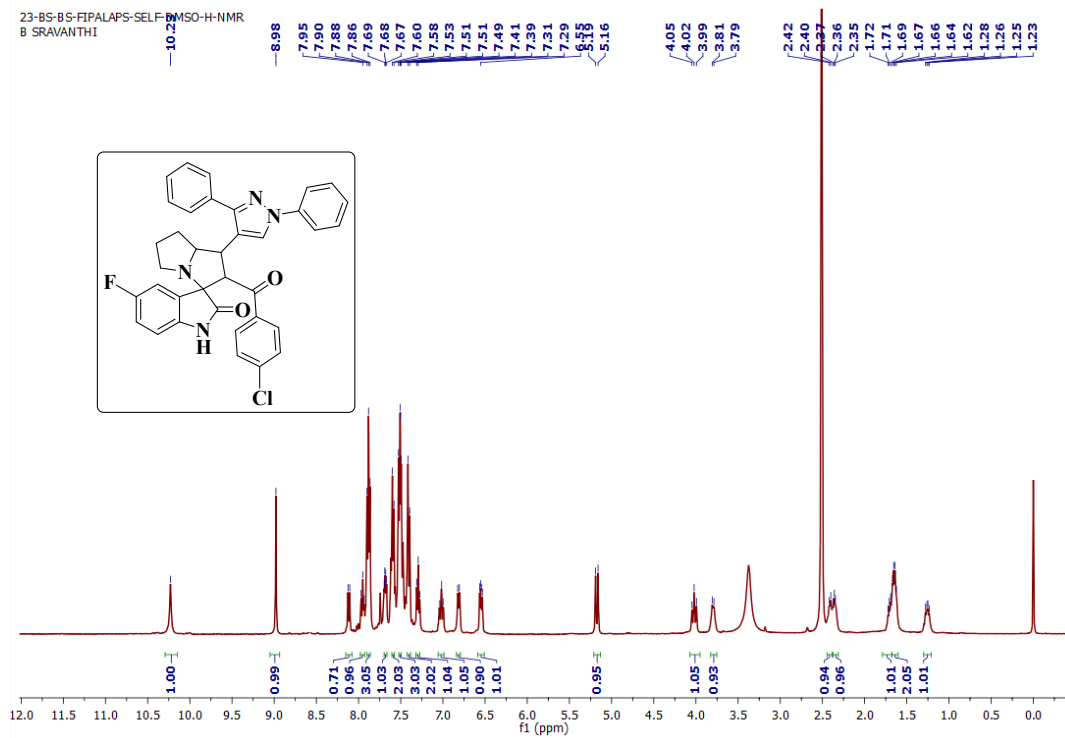

**<sup>1</sup>H NMR Spectrum of the compound 4r**

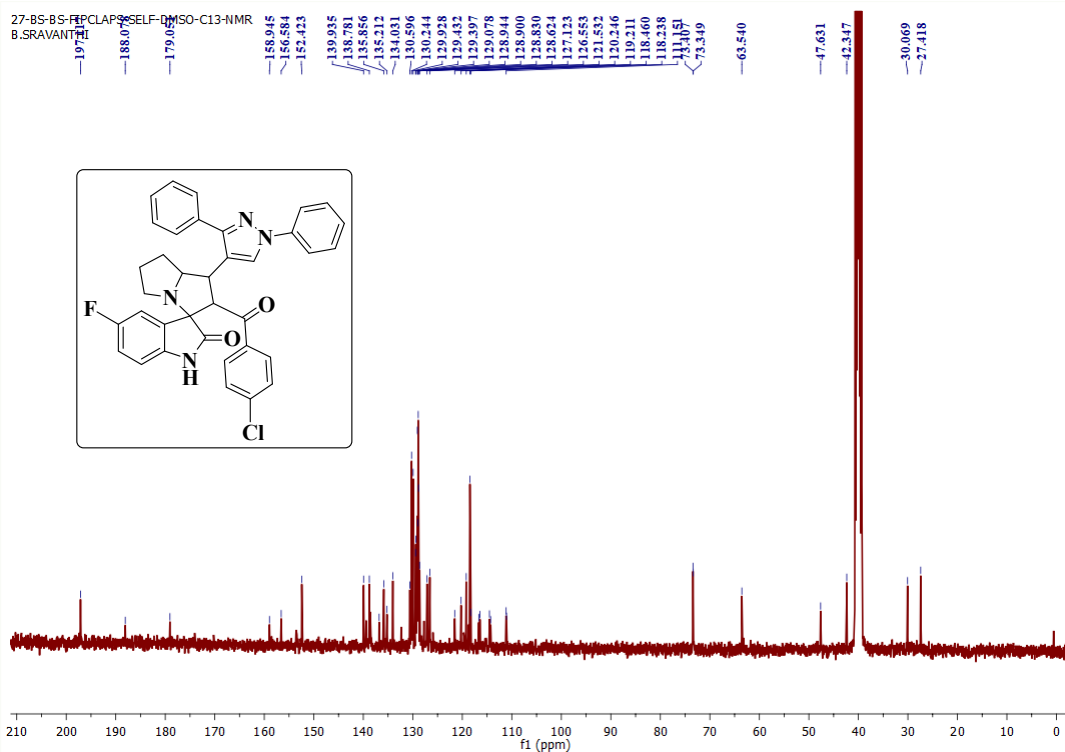

**<sup>13</sup>C NMR Spectrum of the compound 4r**

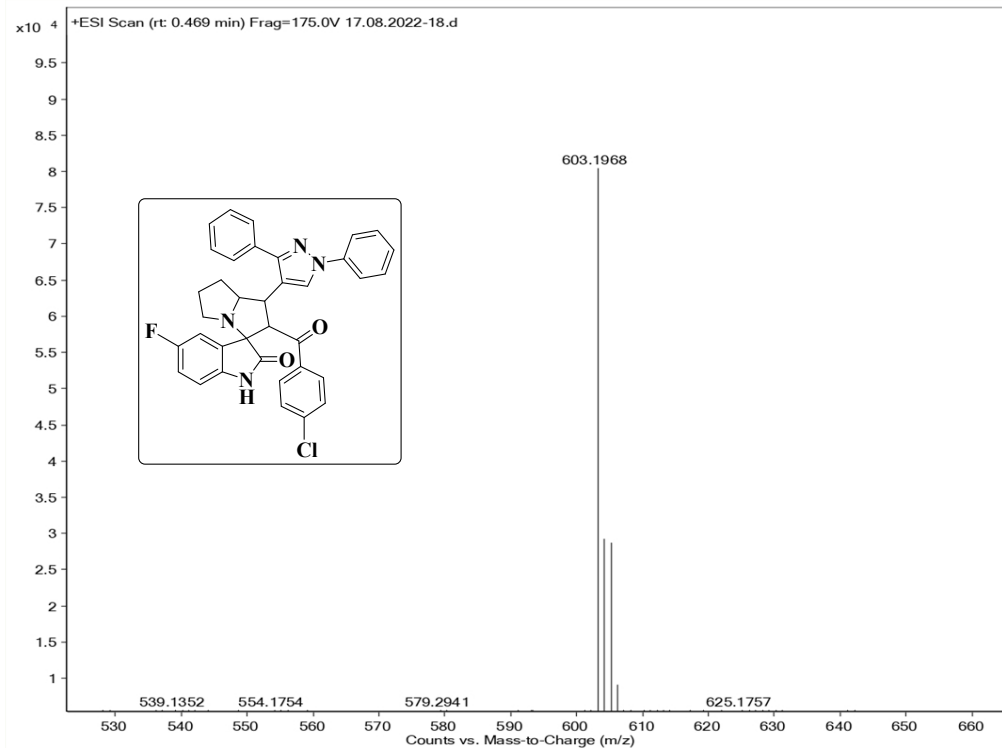

**Mass spectrum of the compound 4r**

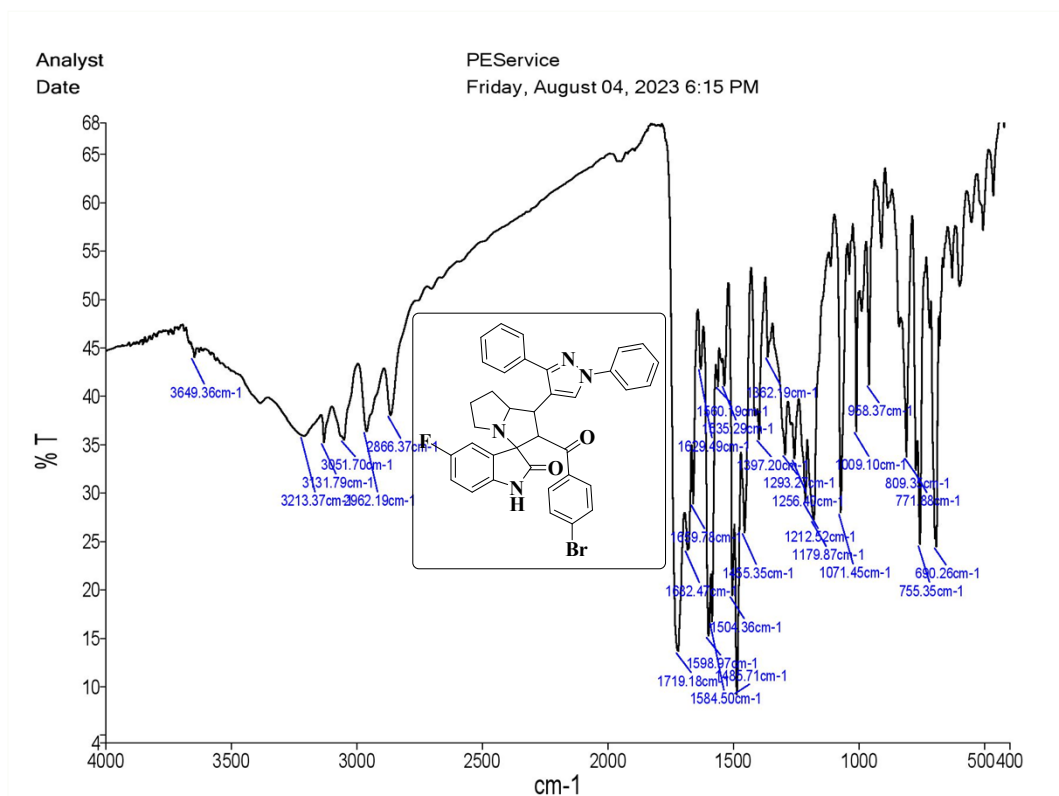

**FT-IR Spectrum of the compound 4s**

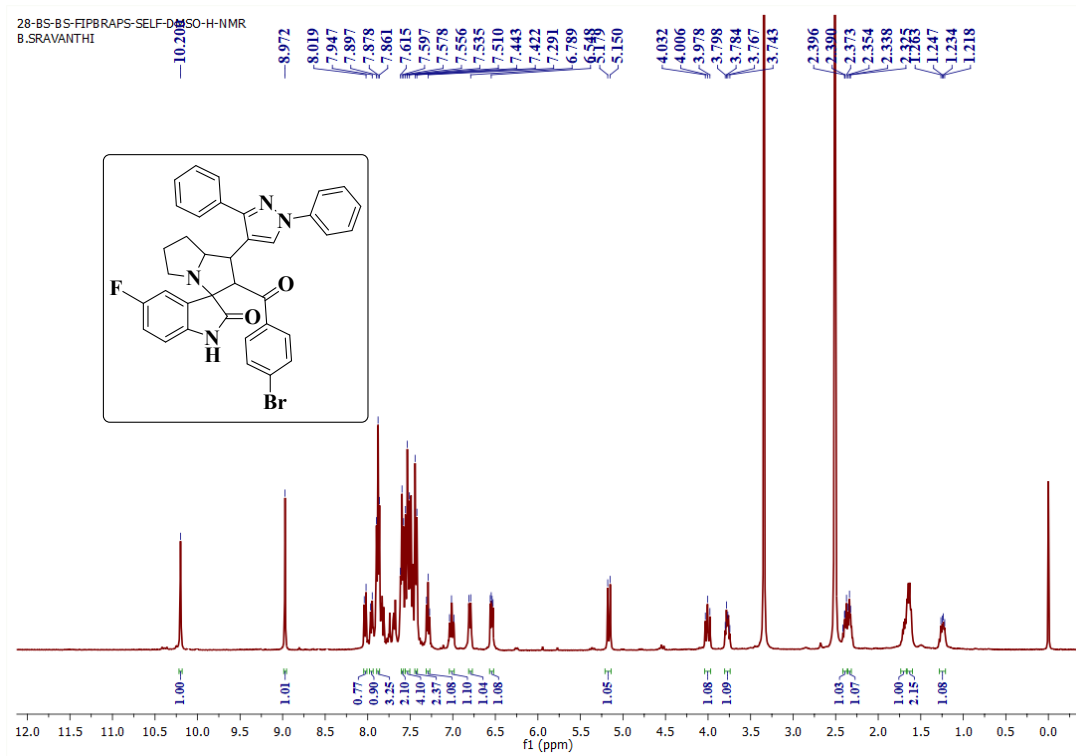

**<sup>1</sup>H NMR Spectrum of the compound 4s**

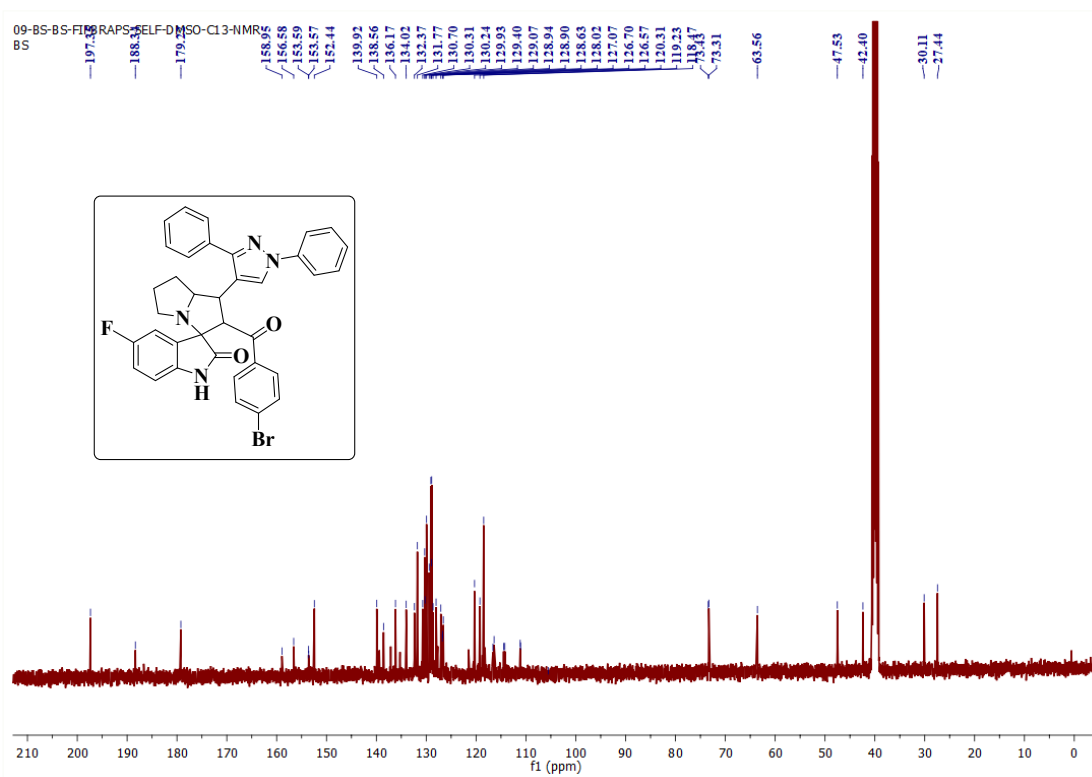

**<sup>13</sup>C NMR Spectrum of the compound 4s**

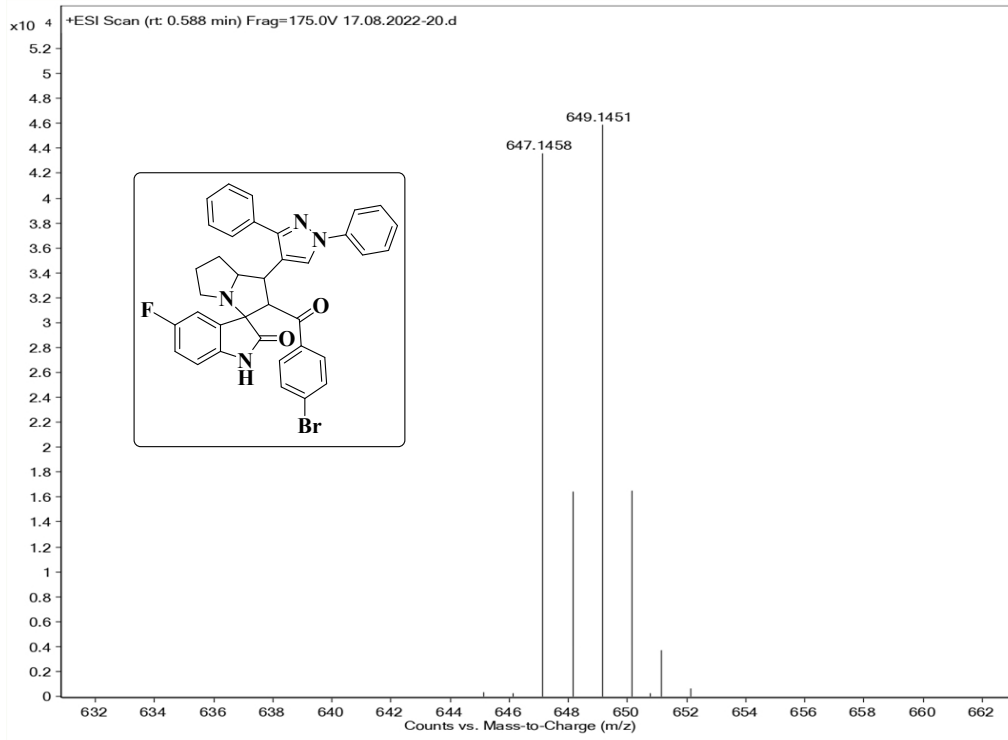

**Mass spectrum of the compound 4s**

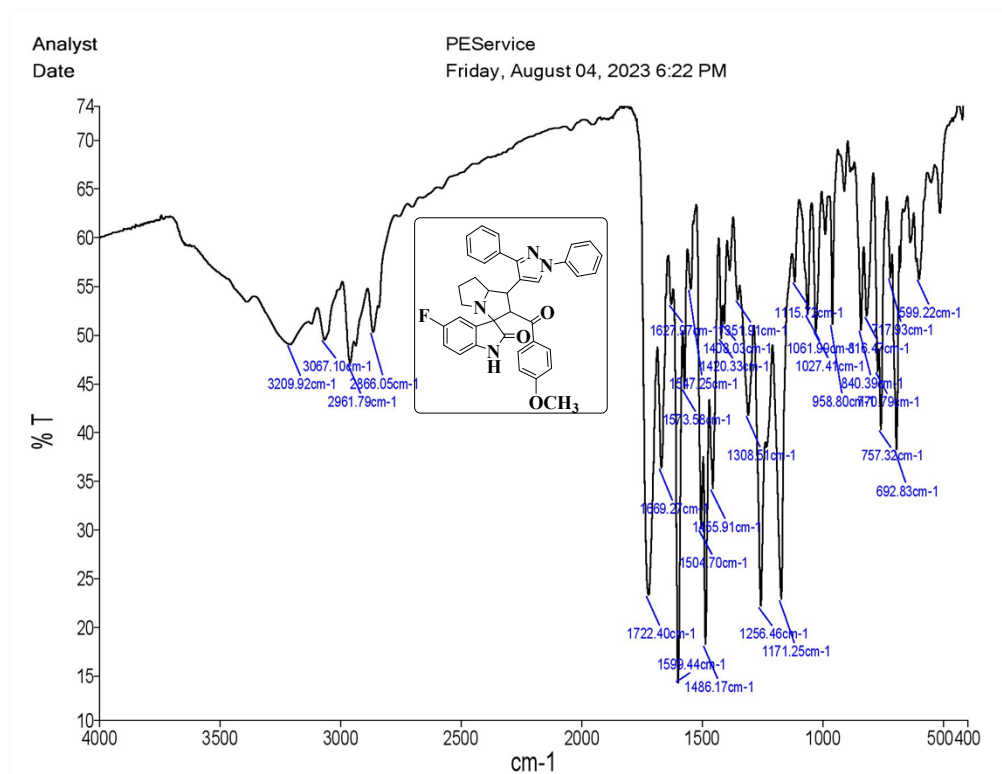

**FT-IR Spectrum of the compound 4t**

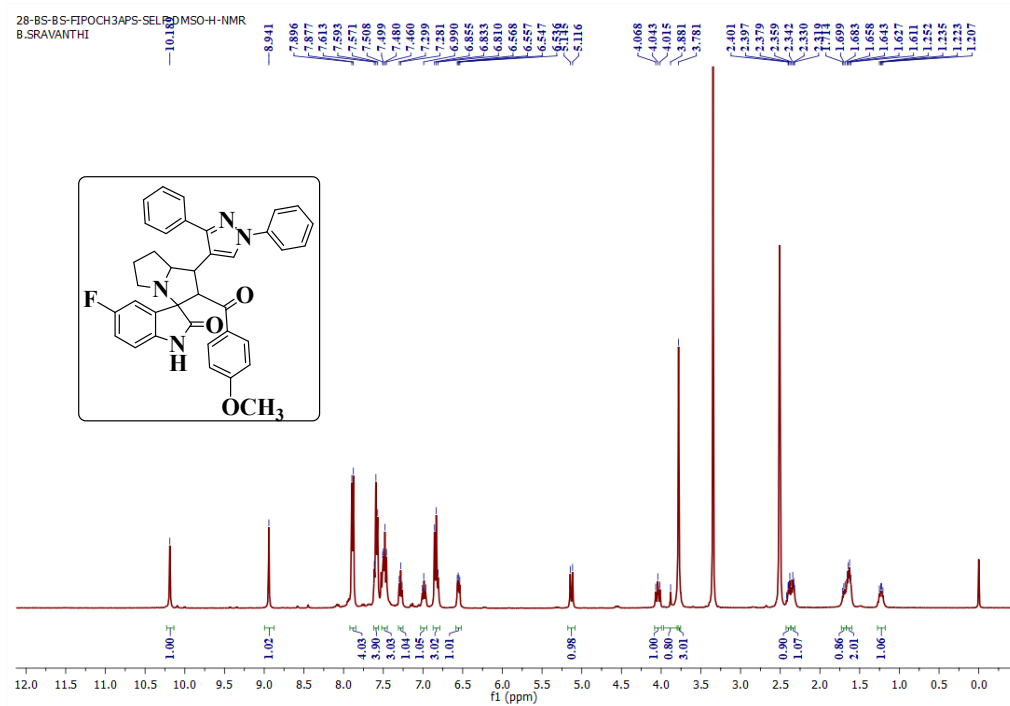

**<sup>1</sup>H NMR Spectrum of the compound 4t**

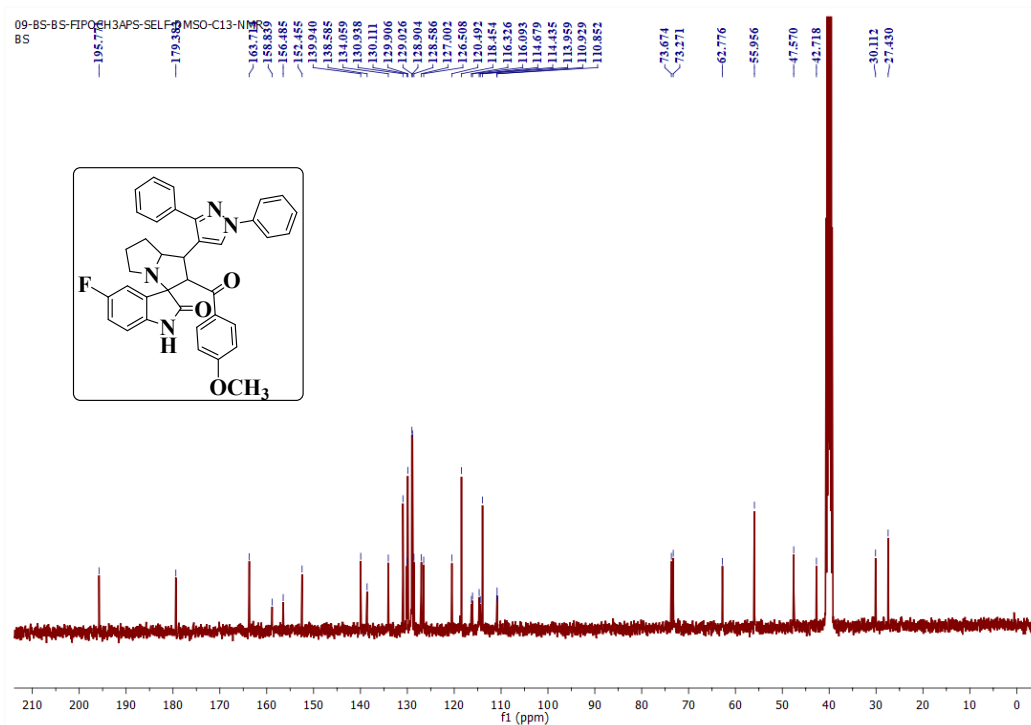

**<sup>13</sup>C NMR Spectrum of the compound 4t**



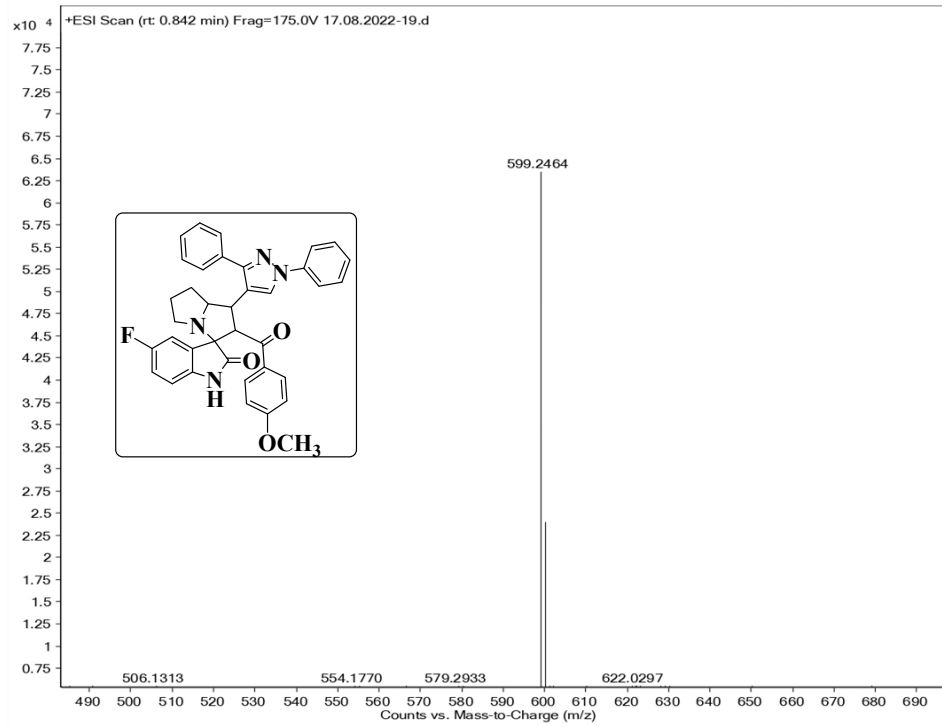

**Mass spectrum of the compound 4t**

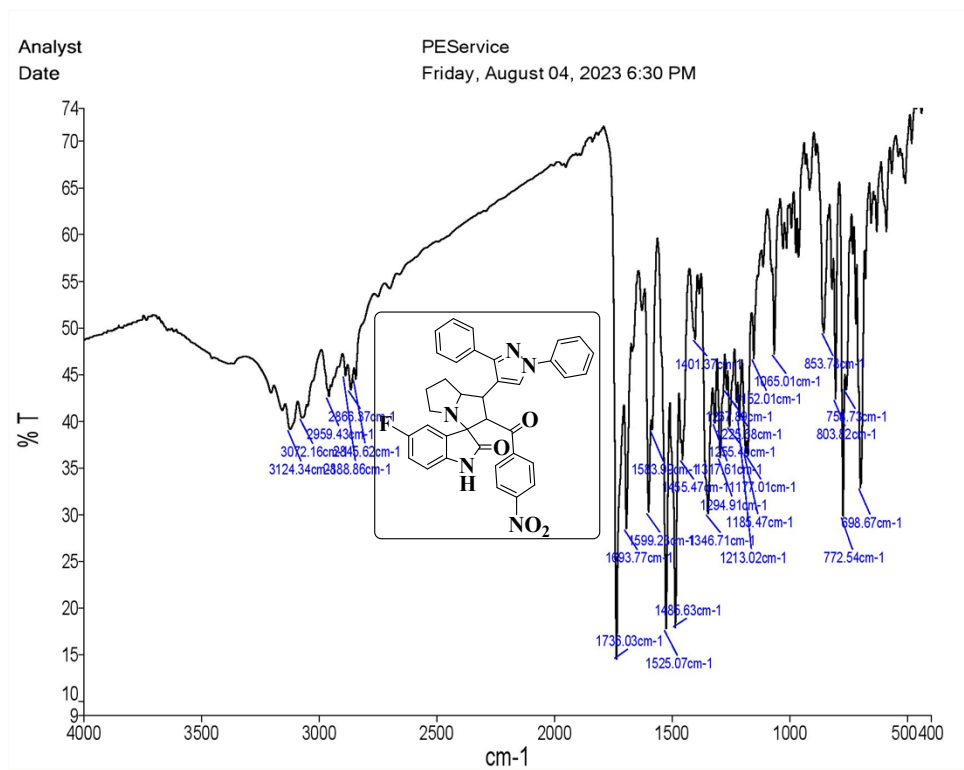

**FT-IR Spectrum of the compound 4u**

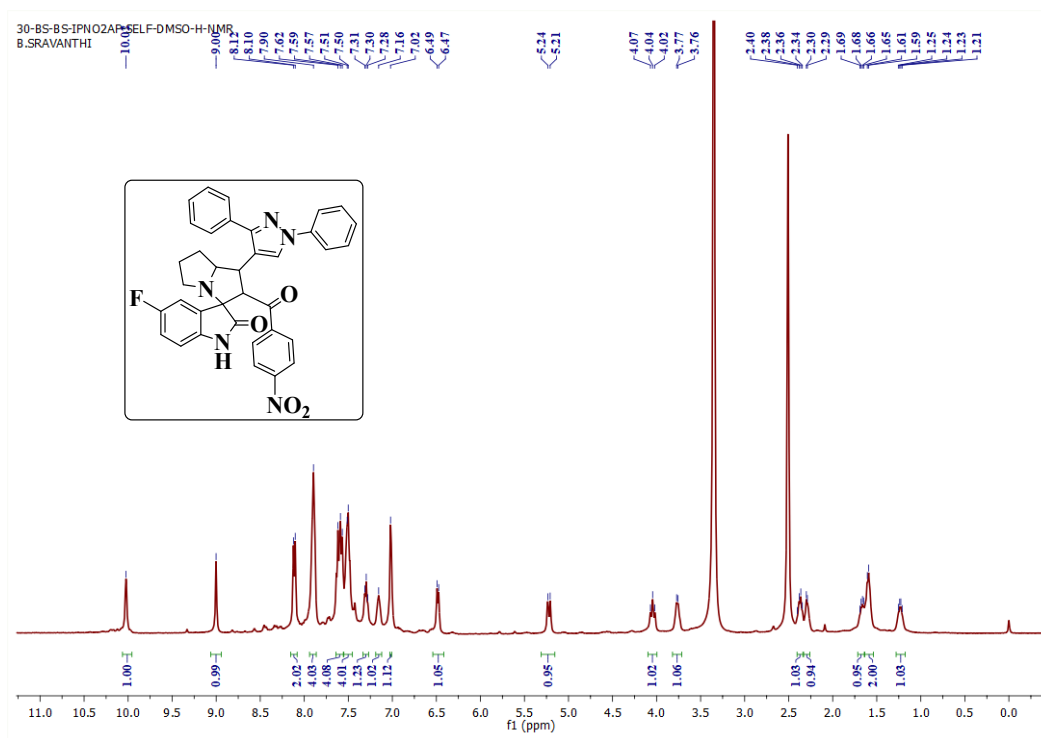

**<sup>1</sup>H NMR Spectrum of the compound 4u**

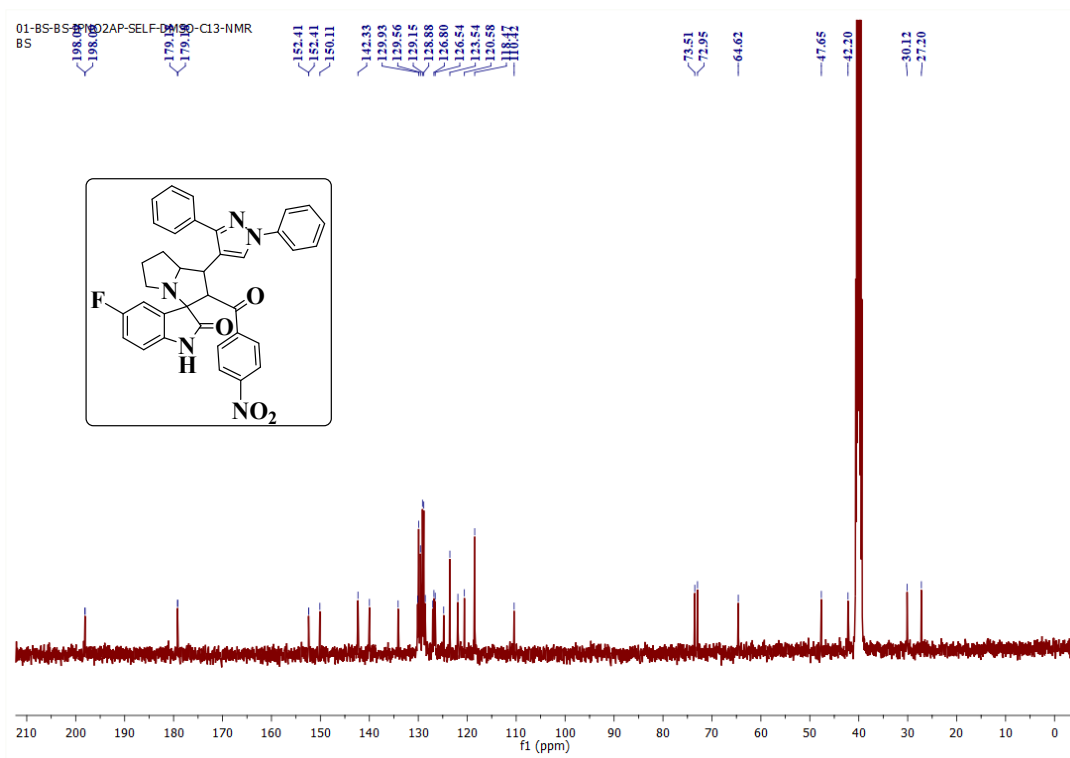

**<sup>13</sup>C NMR Spectrum of the compound 4u**

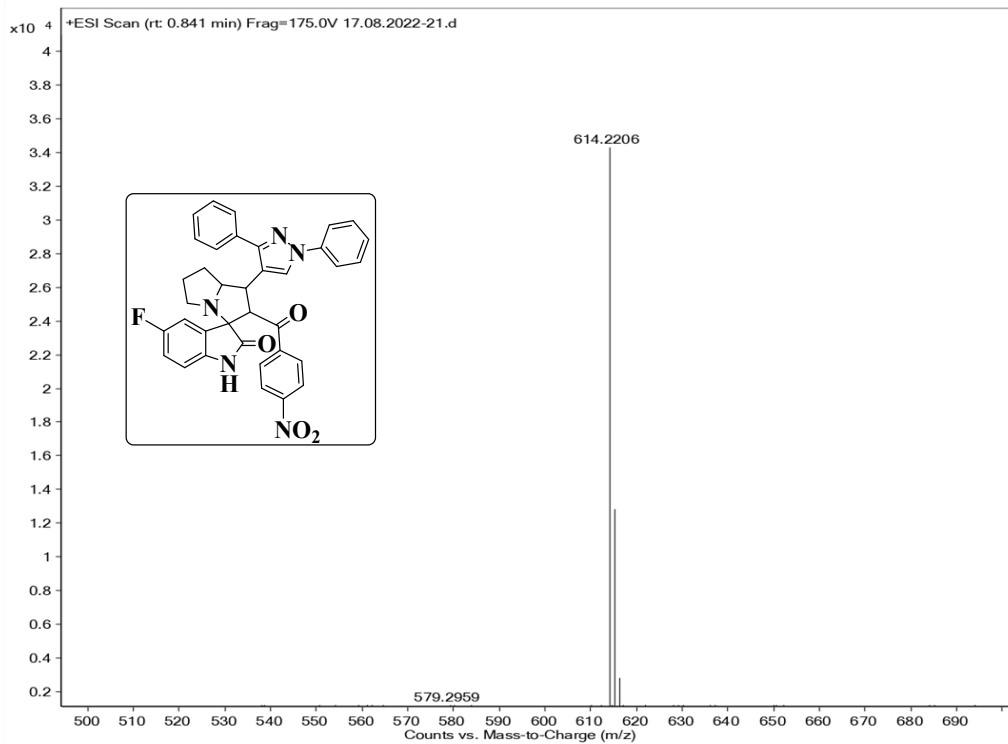

**Mass spectrum of the compound 4u**

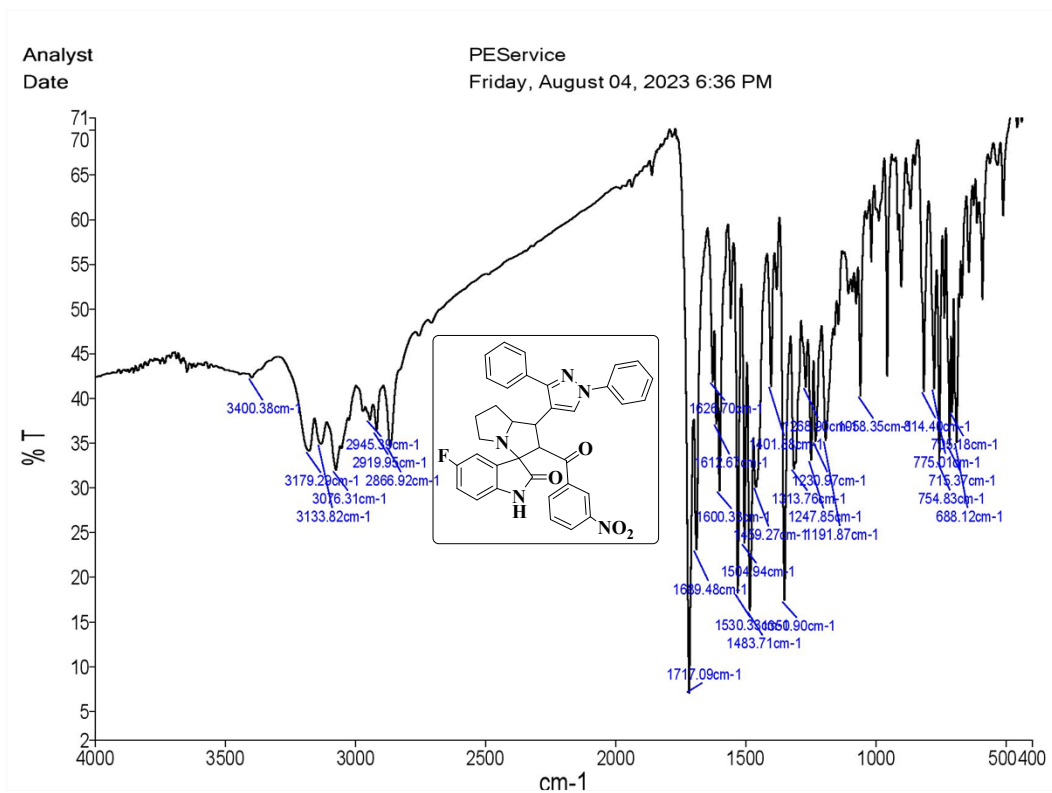

**FT-IR Spectrum of the compound 4v**

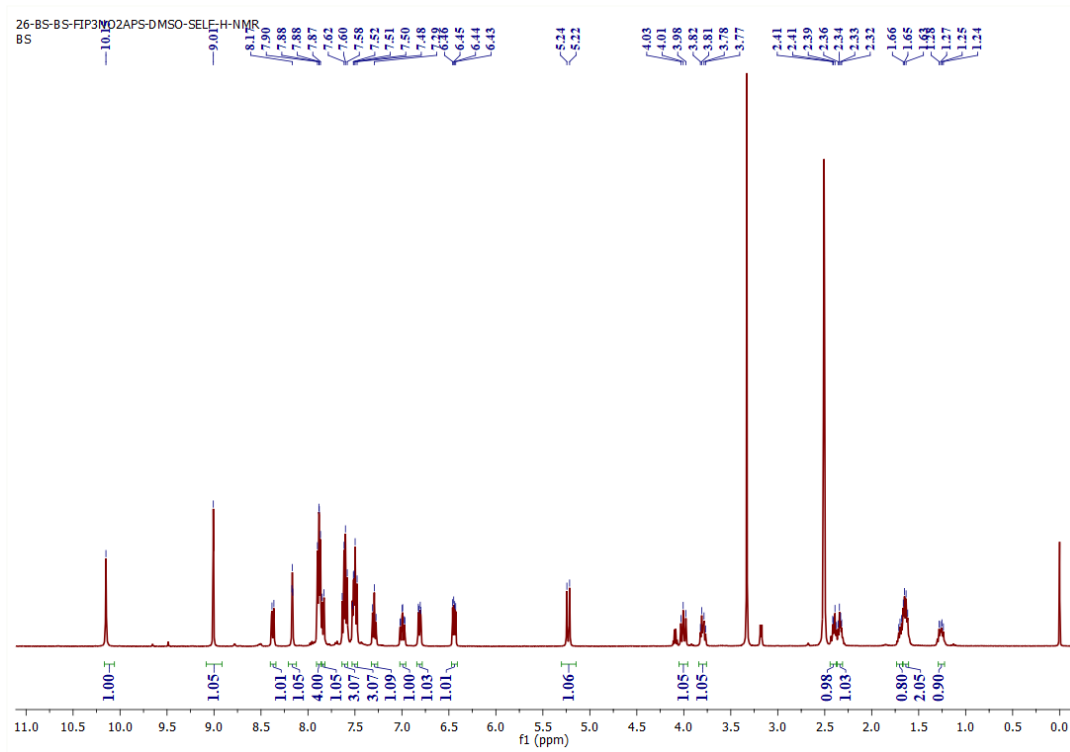

**<sup>1</sup>H NMR Spectrum of the compound 4v**

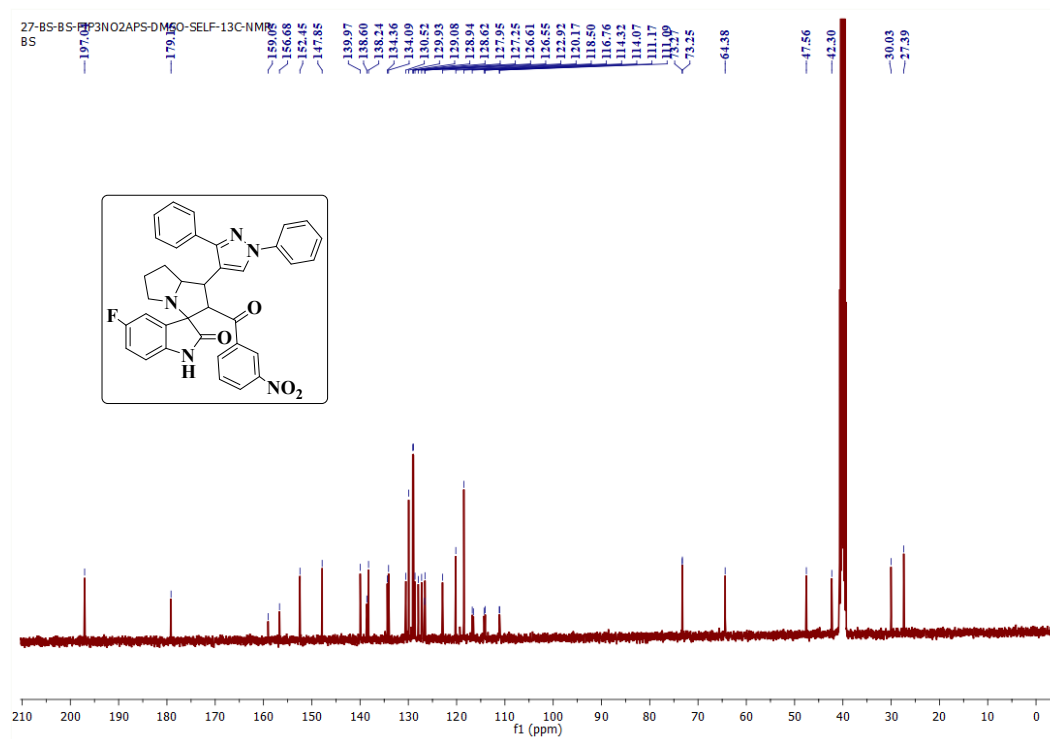

**<sup>13</sup>C NMR Spectrum of the compound 4v**

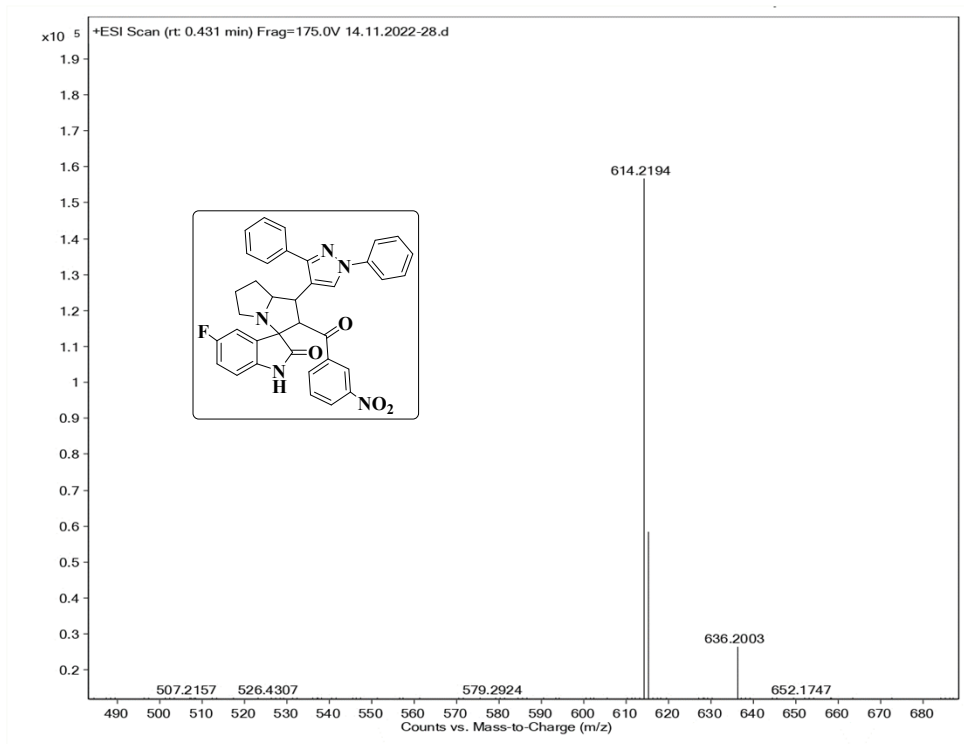

**Mass spectrum of the compound 4v**

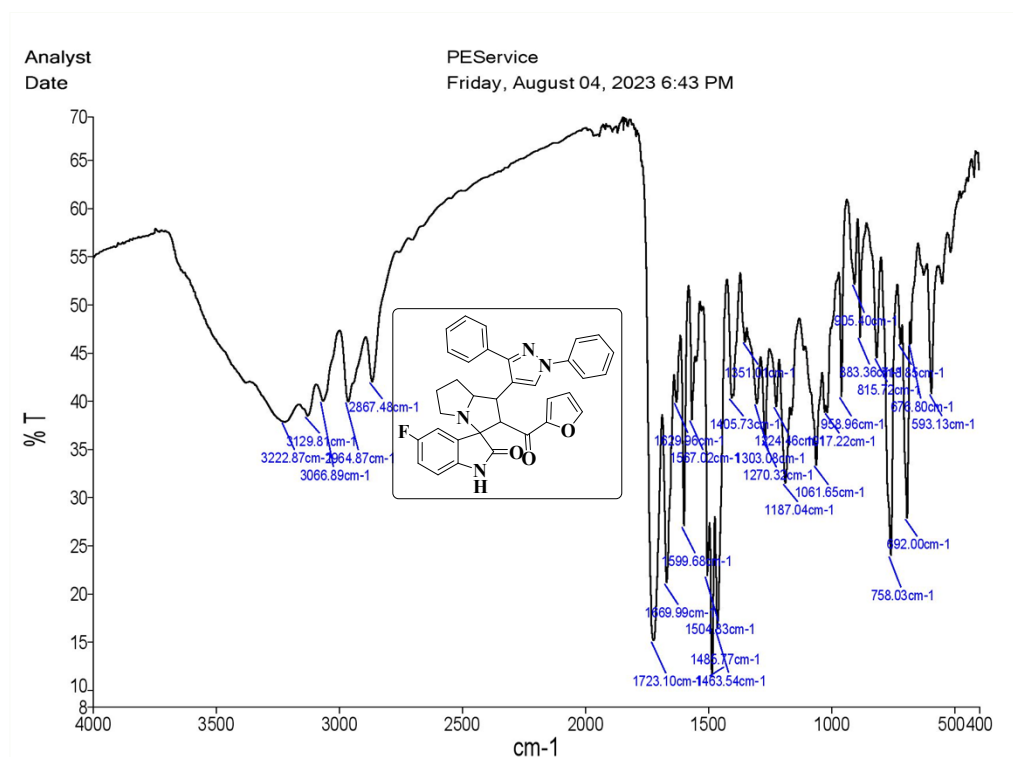

**FT-IR Spectrum of the compound 4w**

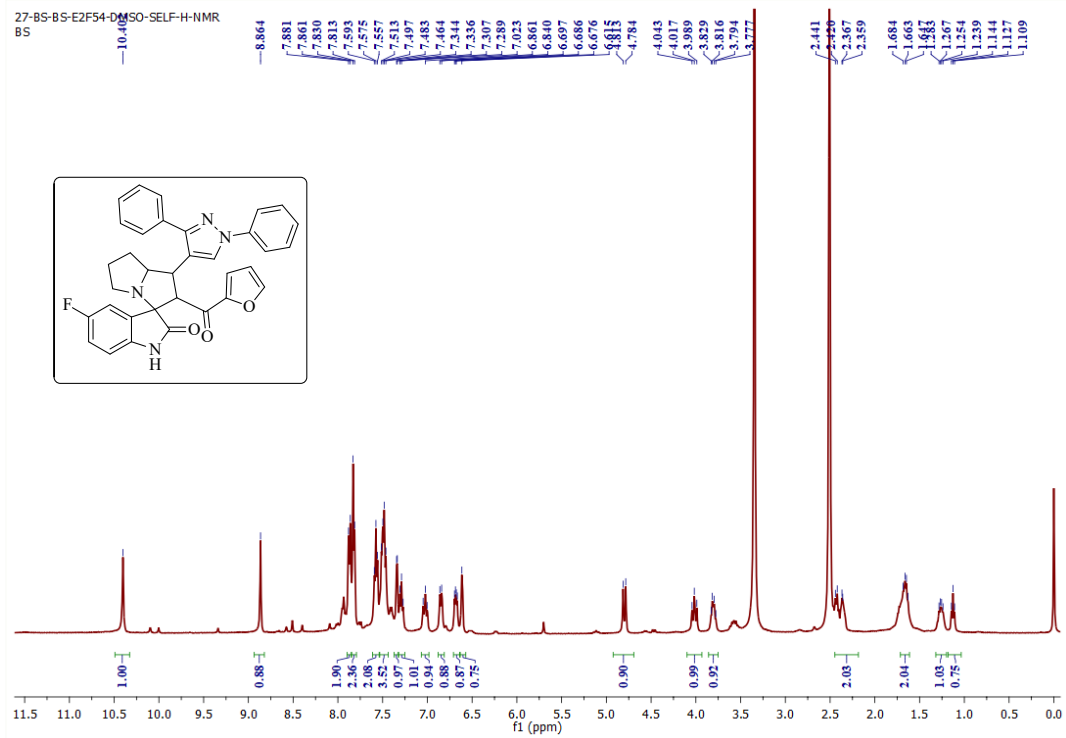

**<sup>1</sup>H NMR Spectrum of the compound 4w**

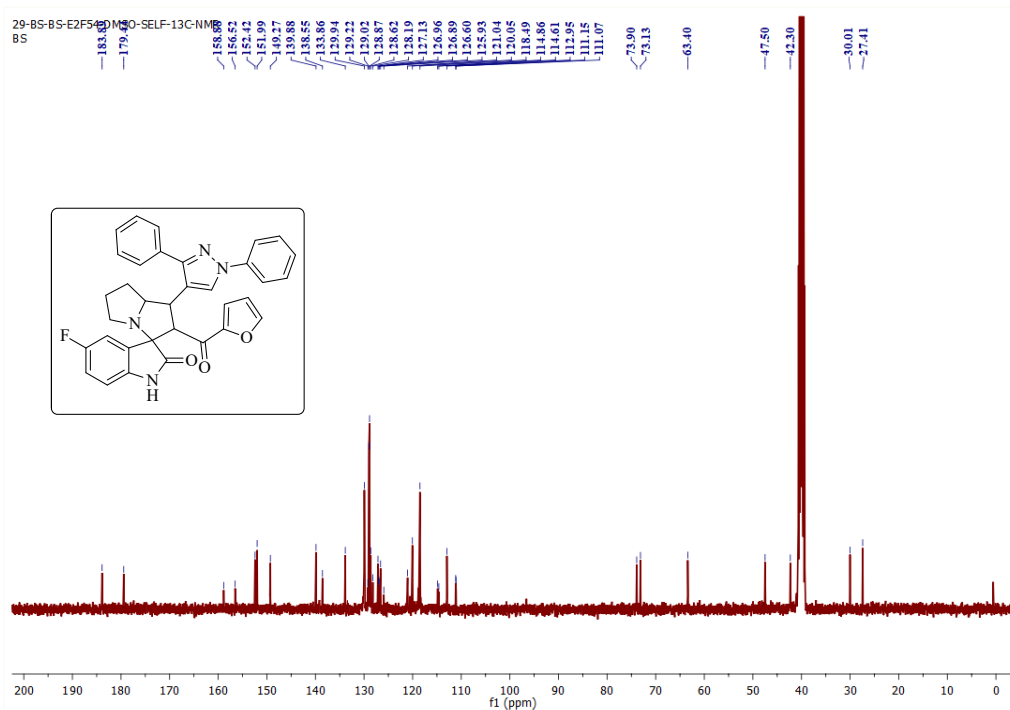

**<sup>13</sup>C NMR Spectrum of the compound 4w**

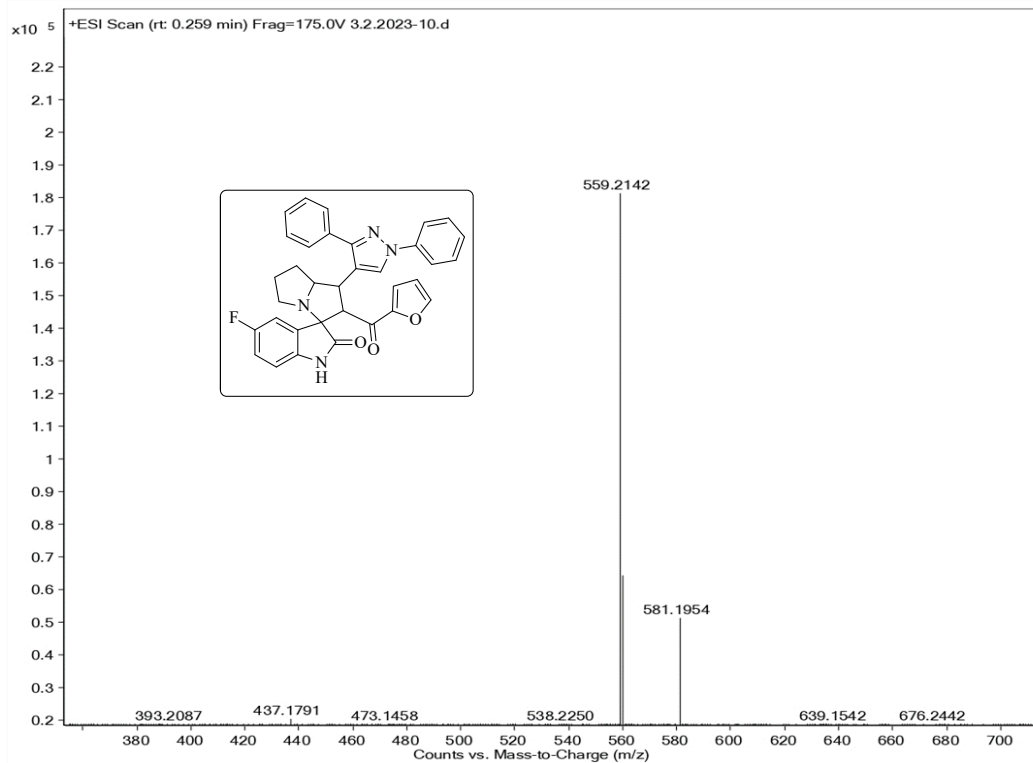

**Mass spectrum of the compound 4w**

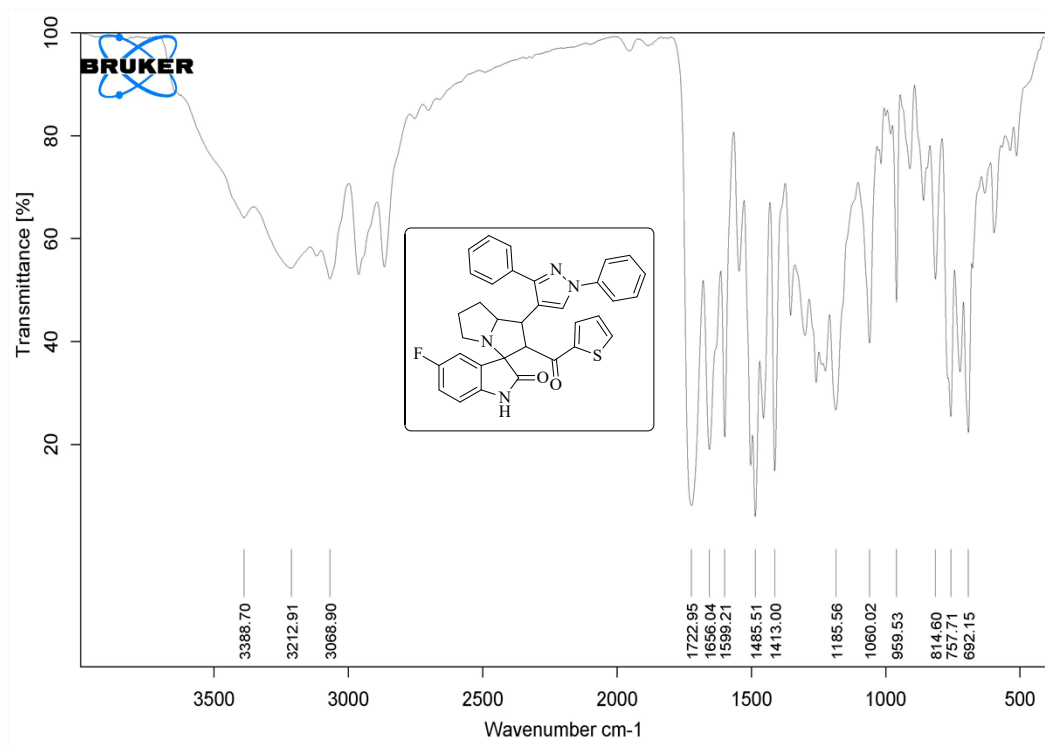

**FT-IR Spectrum of the compound 4x**

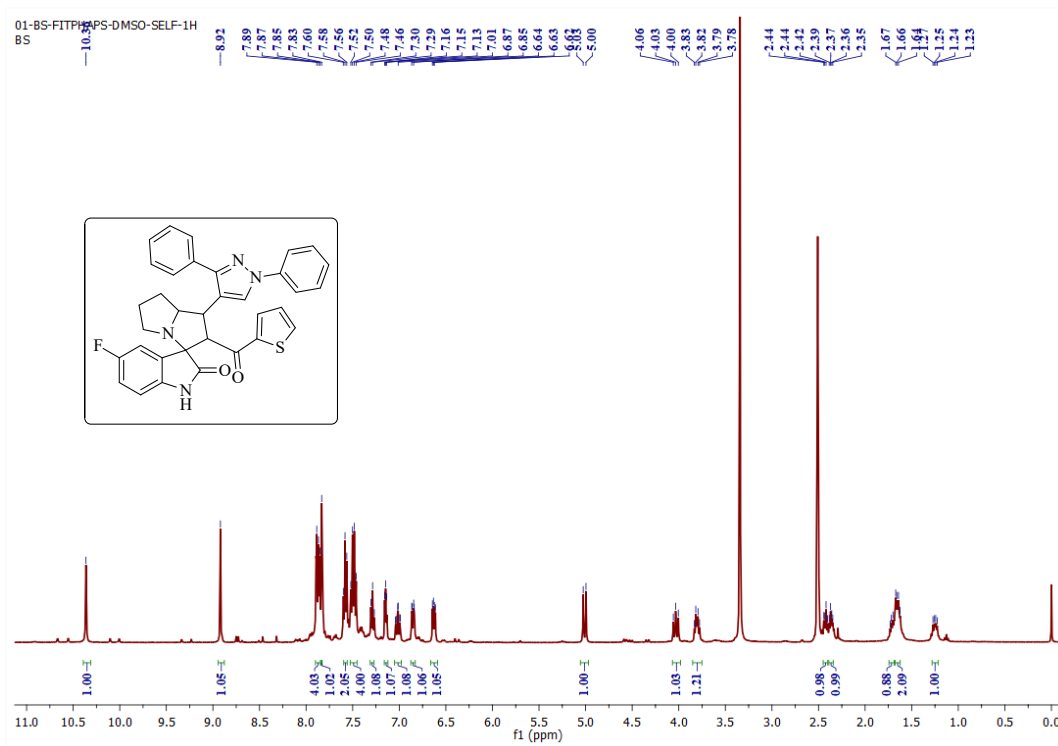

**<sup>1</sup>H NMR Spectrum of the compound 4x**

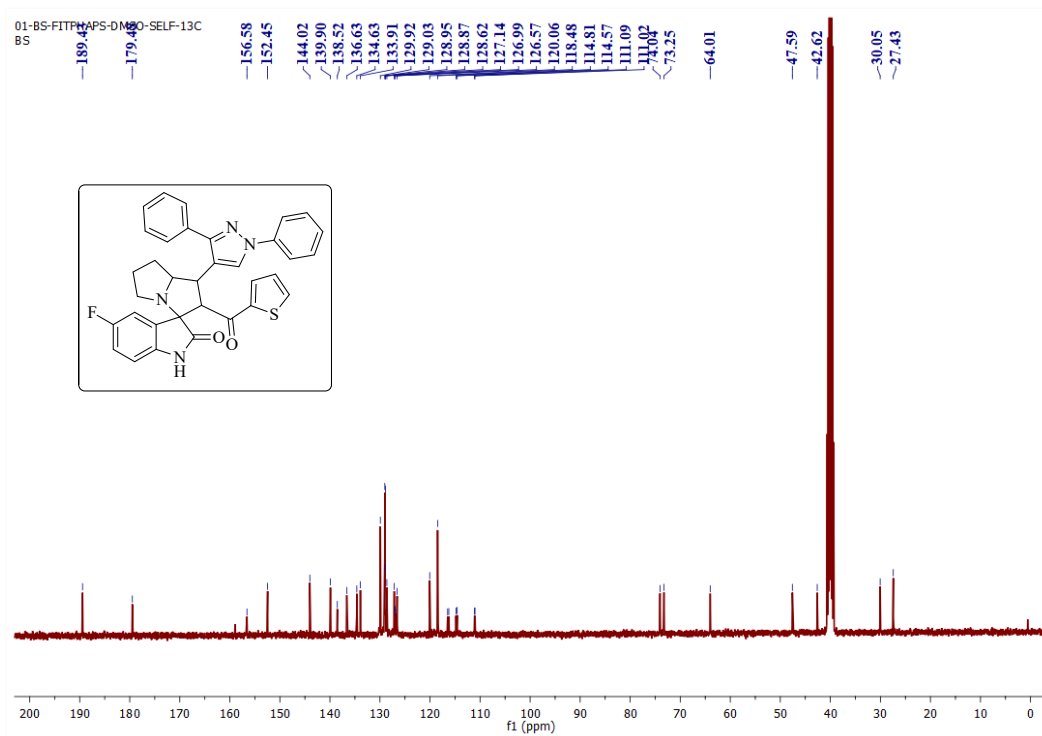

**<sup>13</sup>C NMR Spectrum of the compound 4x**



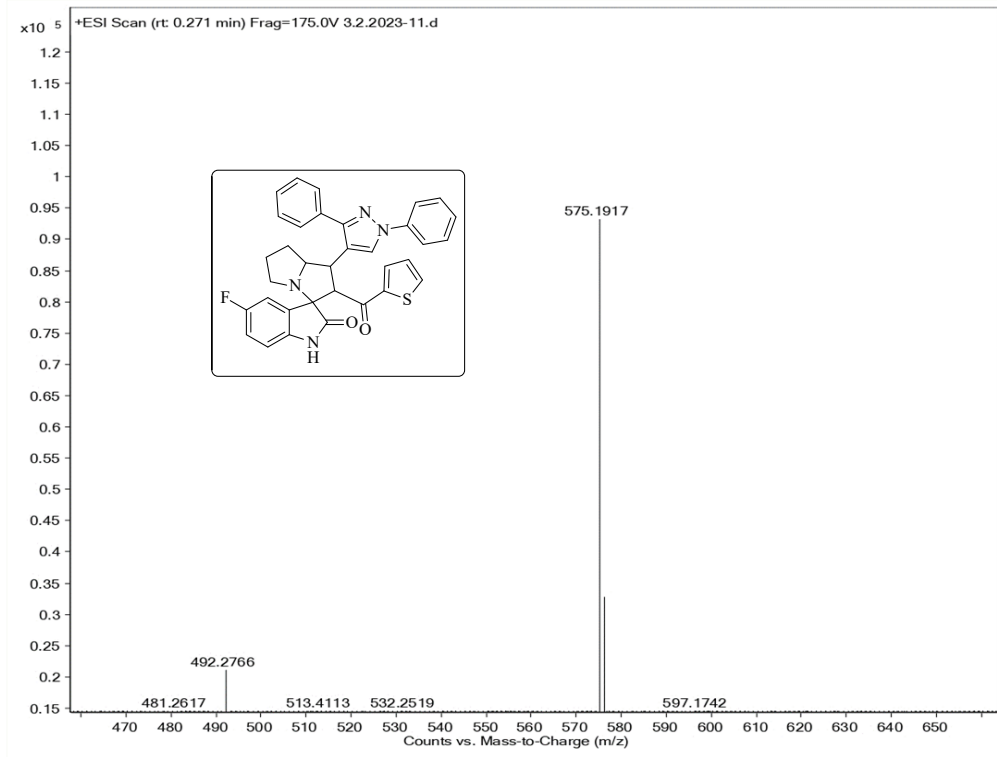

**Mass spectrum of the compound 4x**

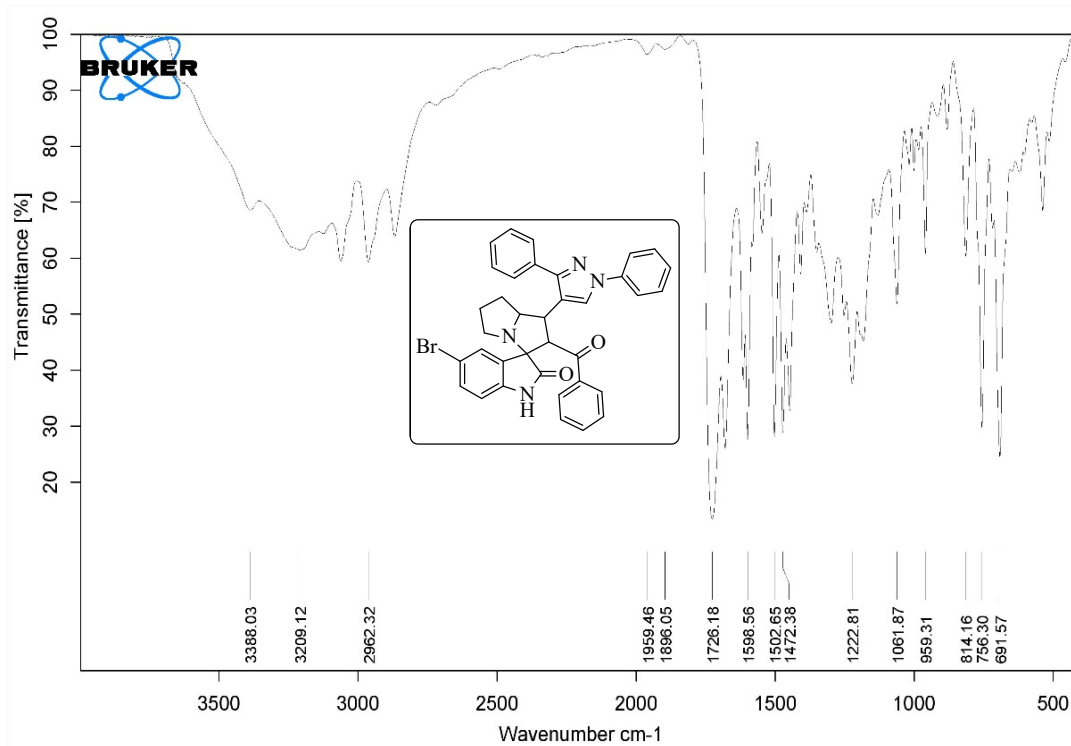

**FT-IR Spectrum of the compound 4y**

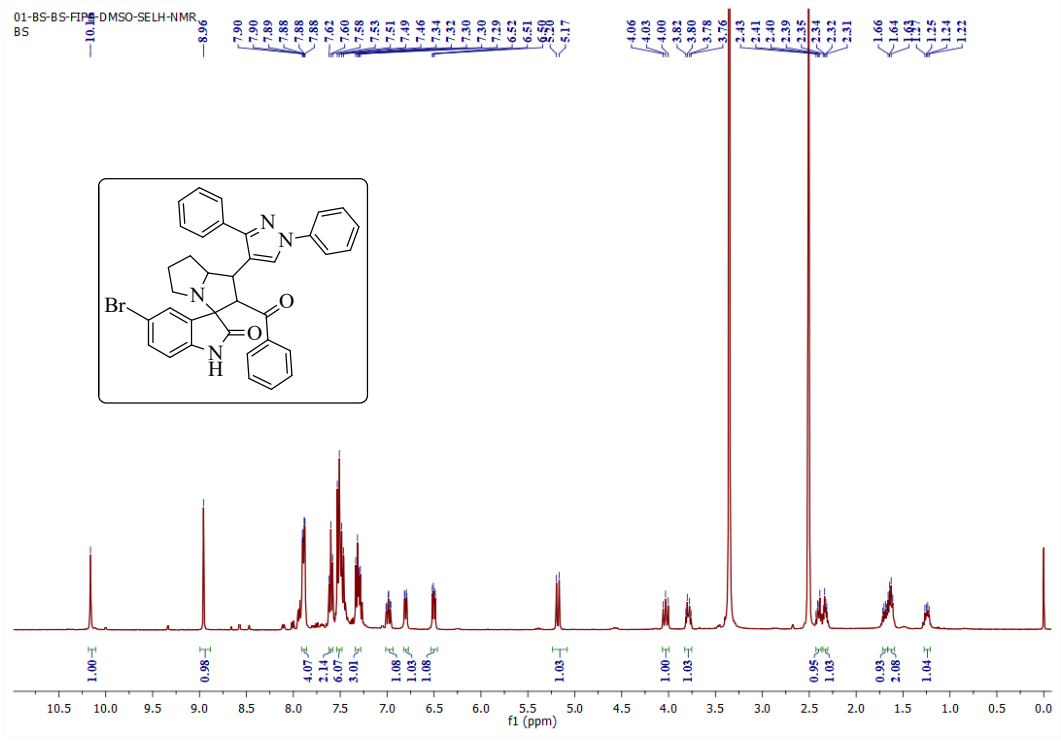

**<sup>1</sup>H NMR Spectrum of the compound 4y**

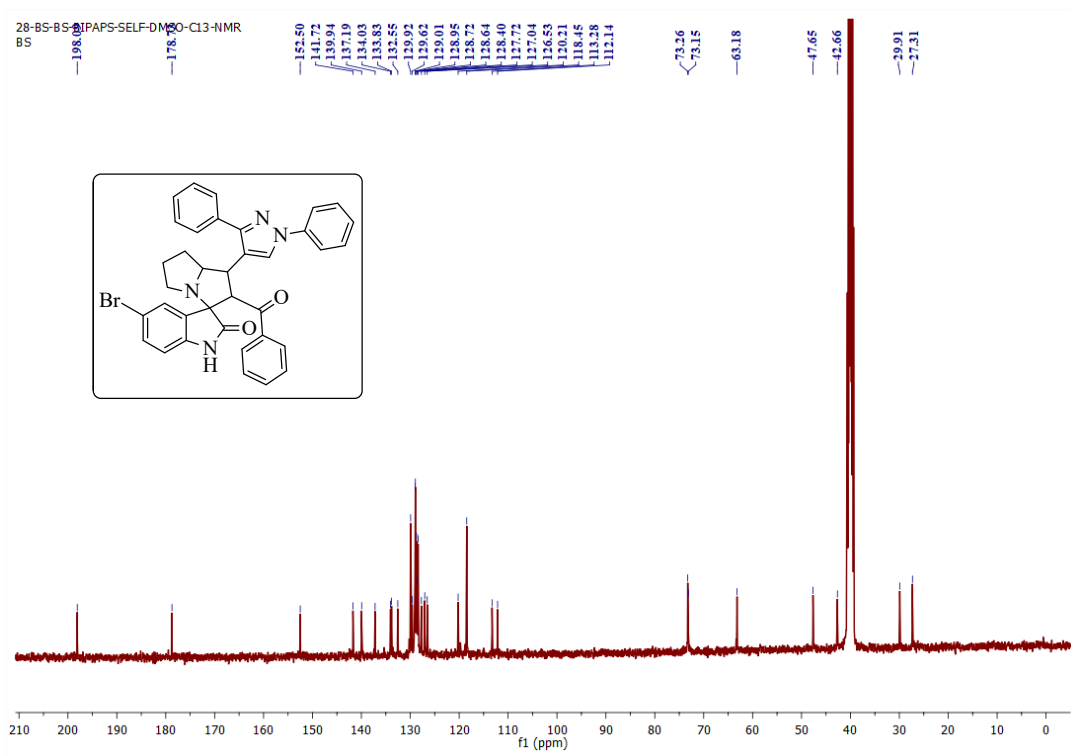

**<sup>13</sup>C NMR Spectrum of the compound 4y**

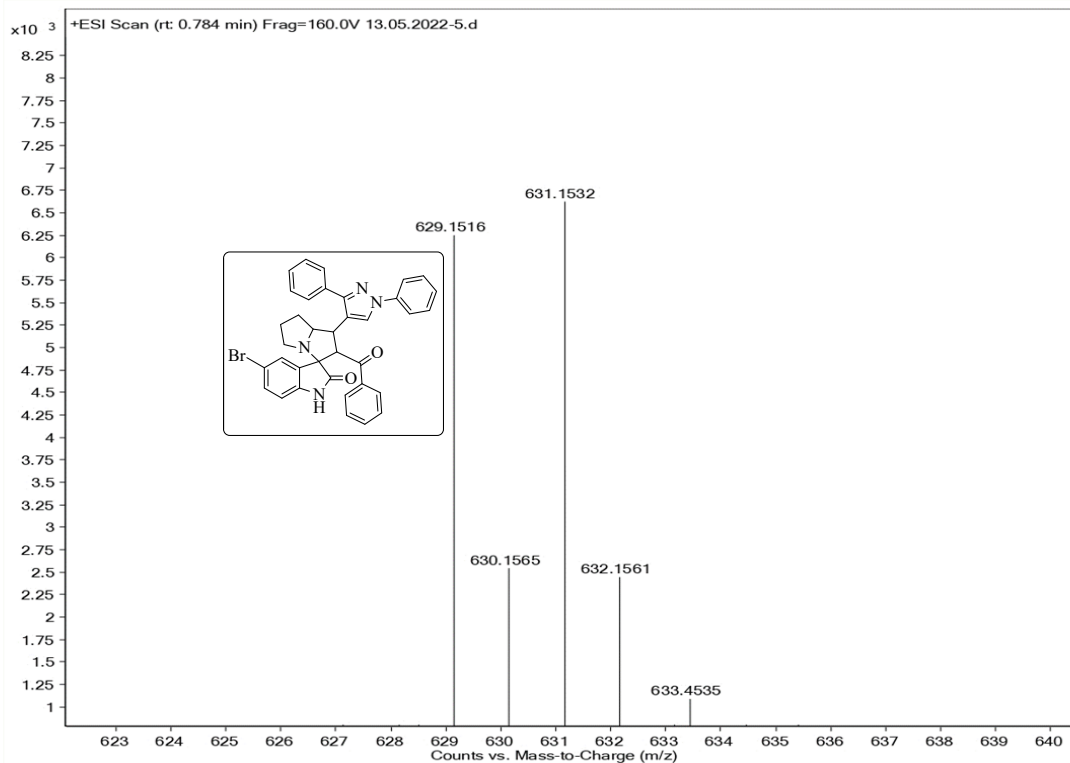

**Mass spectrum of the compound 4y**

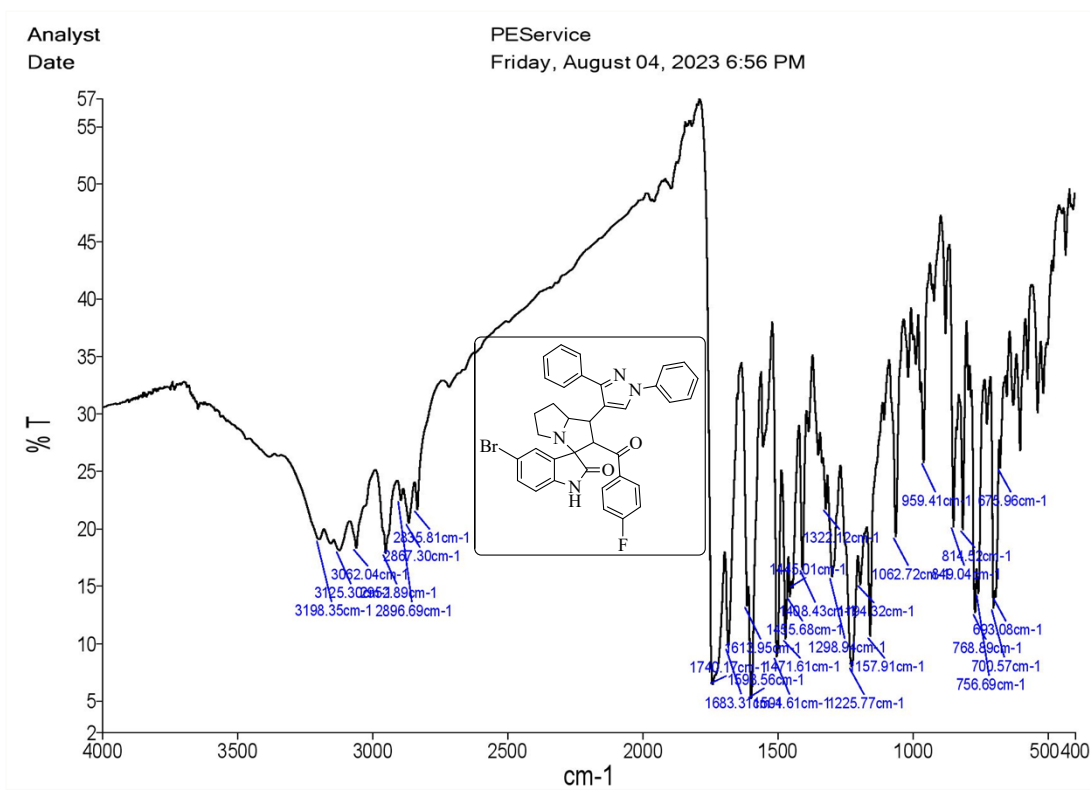

**FT-IR Spectrum of the compound 4z**

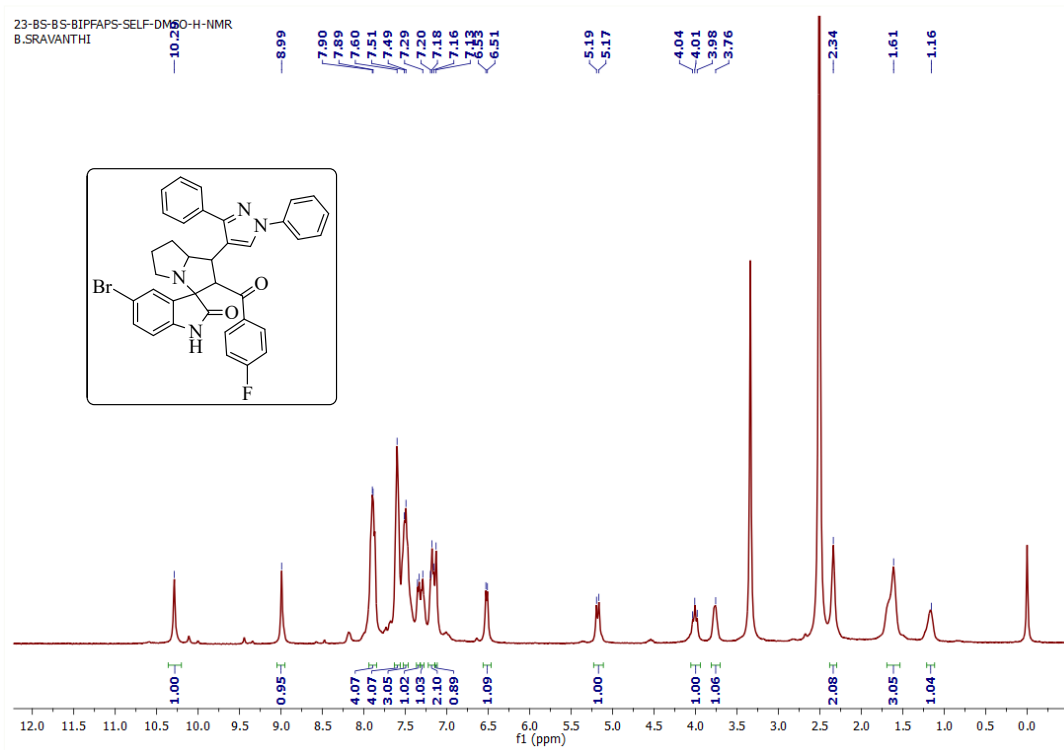

**<sup>1</sup>H NMR Spectrum of the compound 4z**

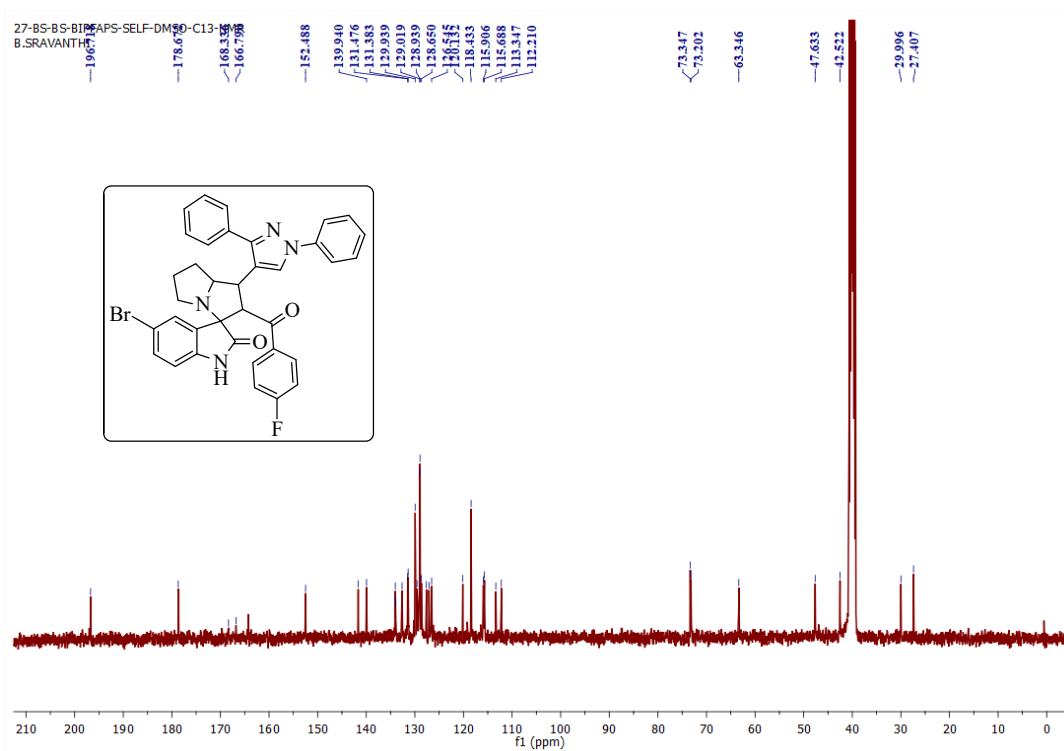

**<sup>13</sup>C NMR Spectrum of the compound 4z**

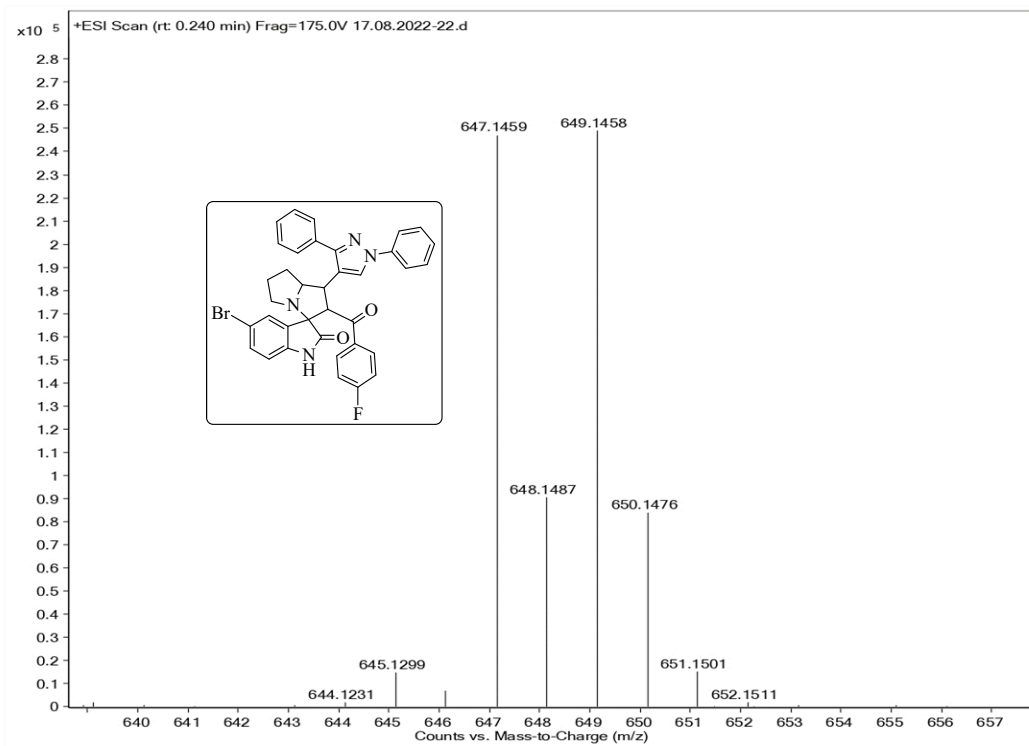

**Mass spectrum of the compound 4z**

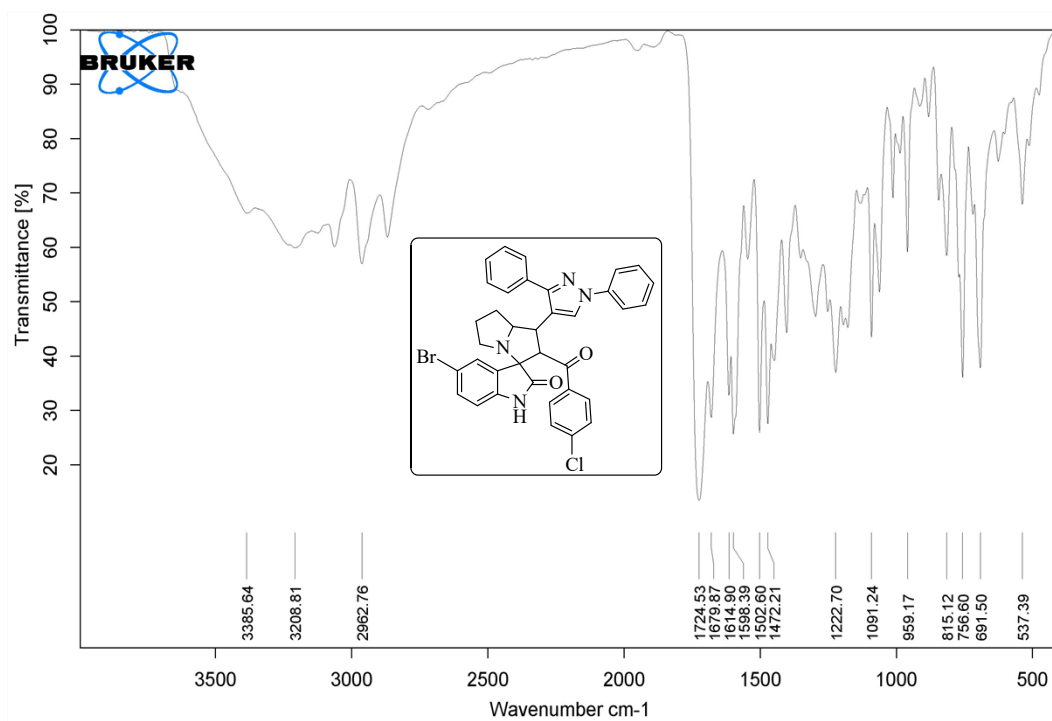

**FT-IR Spectrum of the compound 4aa**

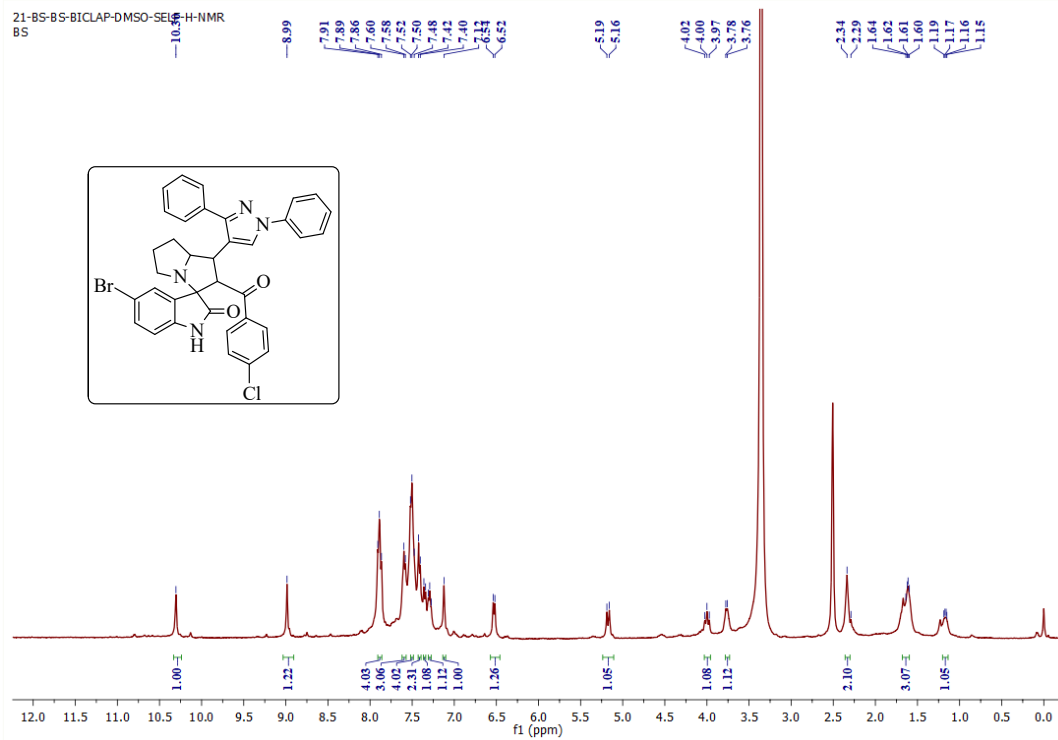

<sup>1</sup>H NMR Spectrum of the compound 4aa

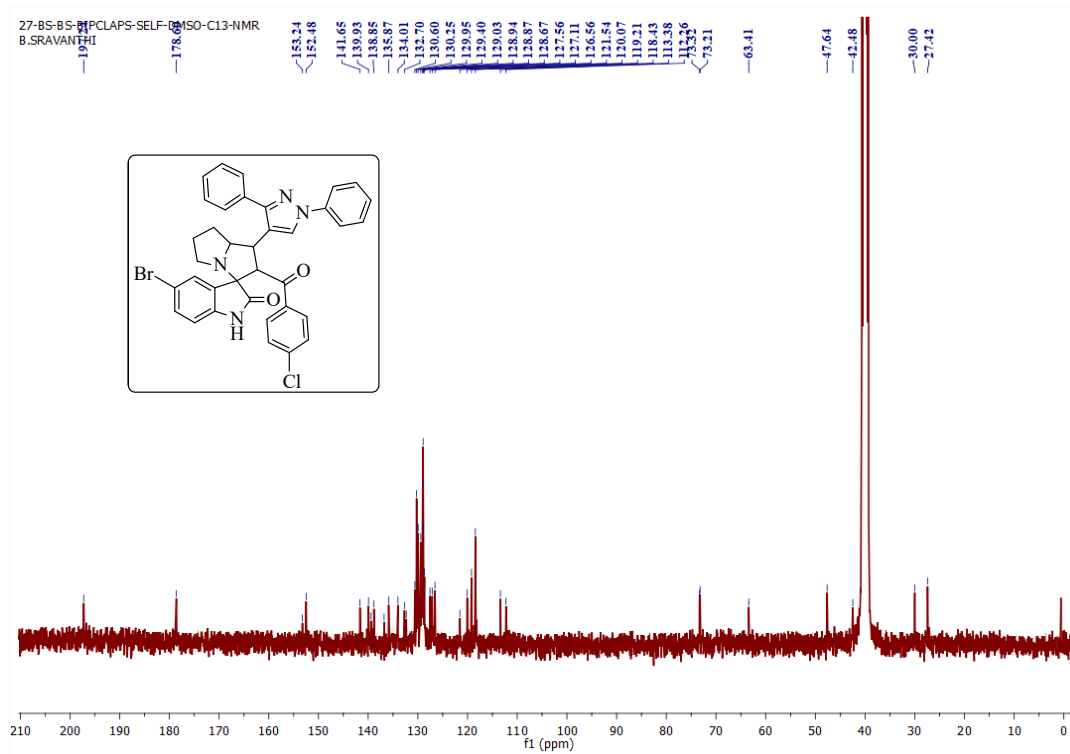

<sup>13</sup>C NMR Spectrum of the compound 4aa

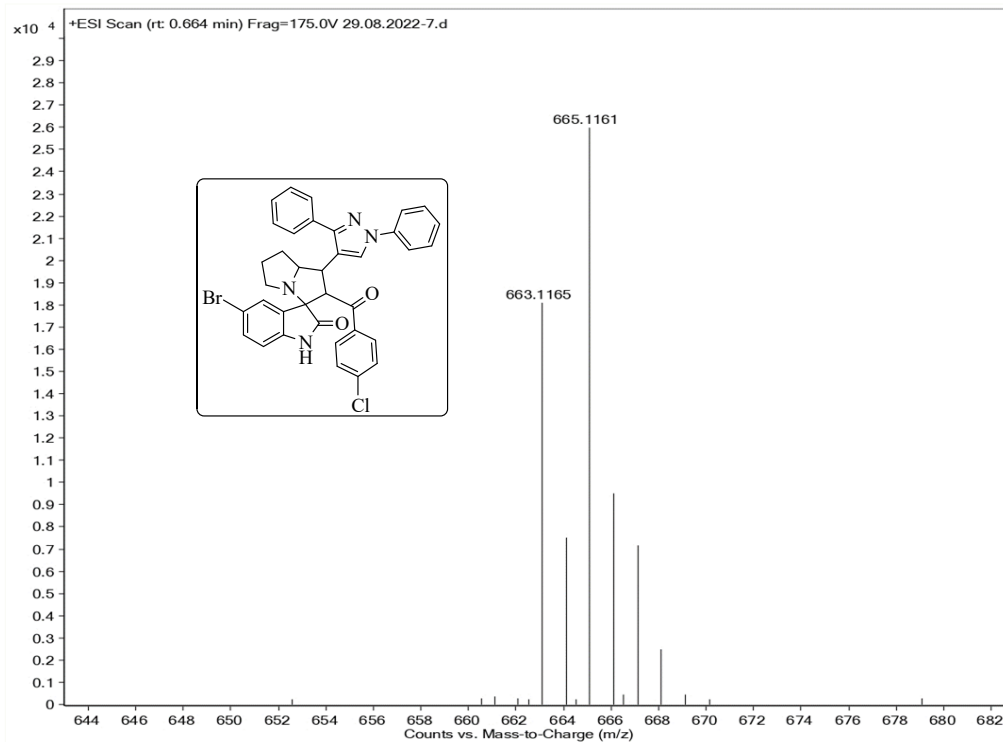

**Mass spectrum of the compound 4aa**

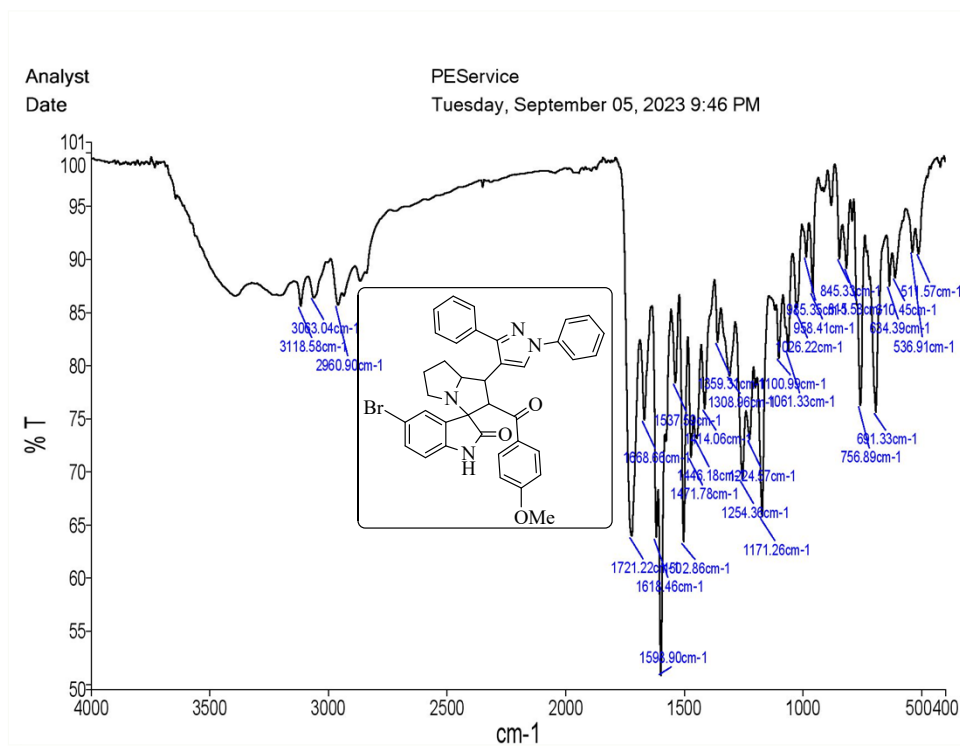

**FT-IR Spectrum of the compound 4ab**





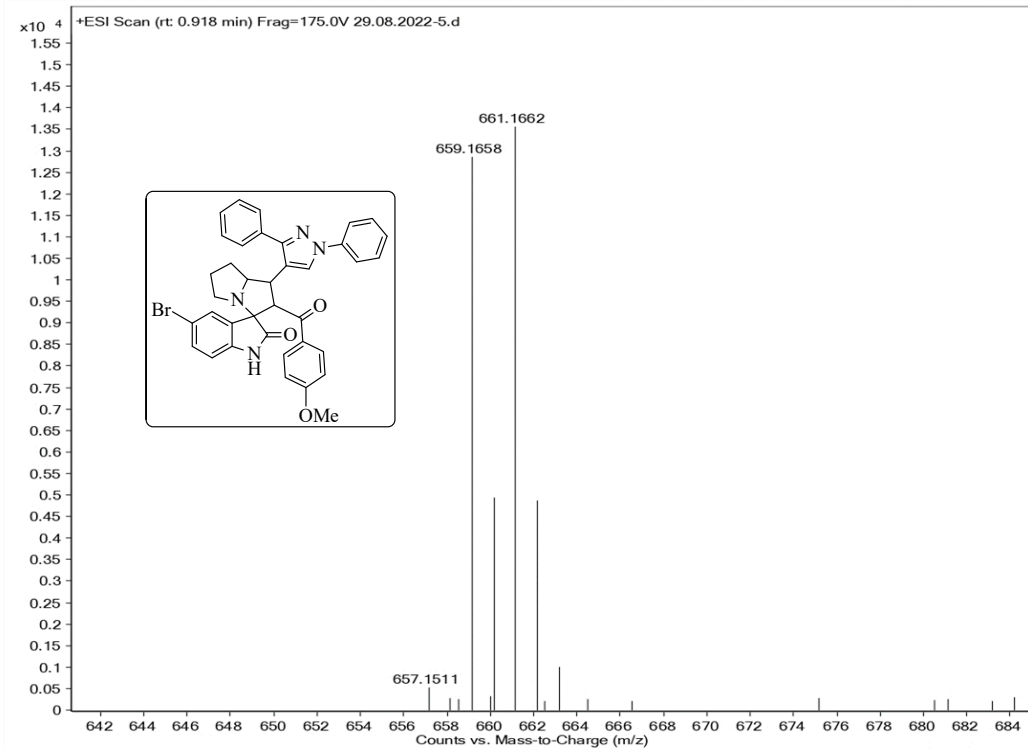

**Mass spectrum of the compound 4ab**

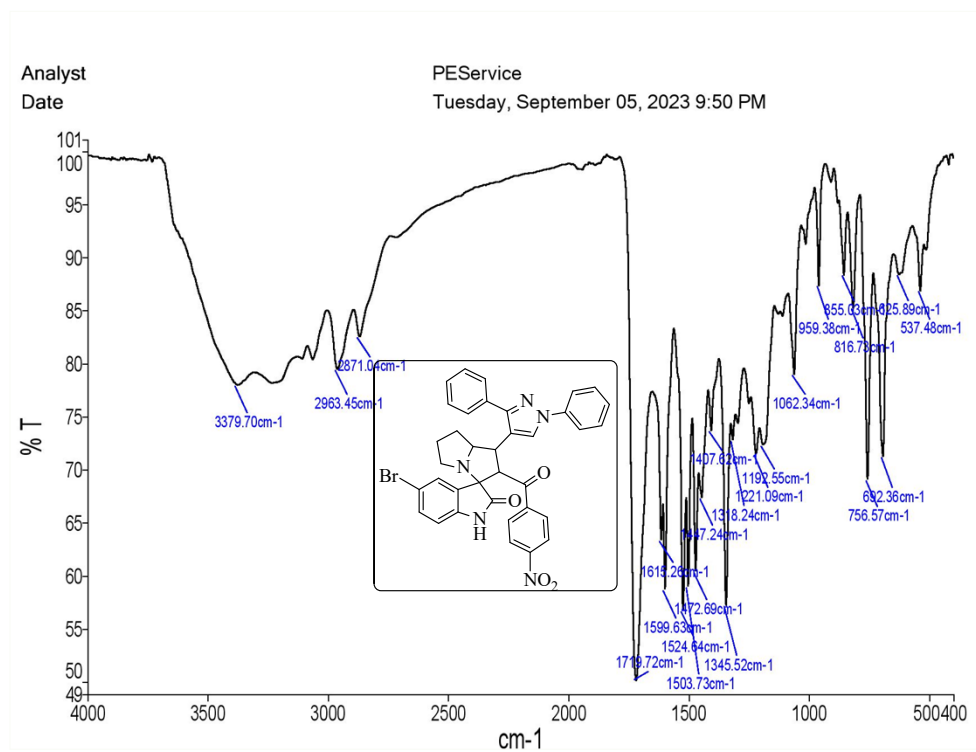

**FT-IR Spectrum of the compound 4ac**

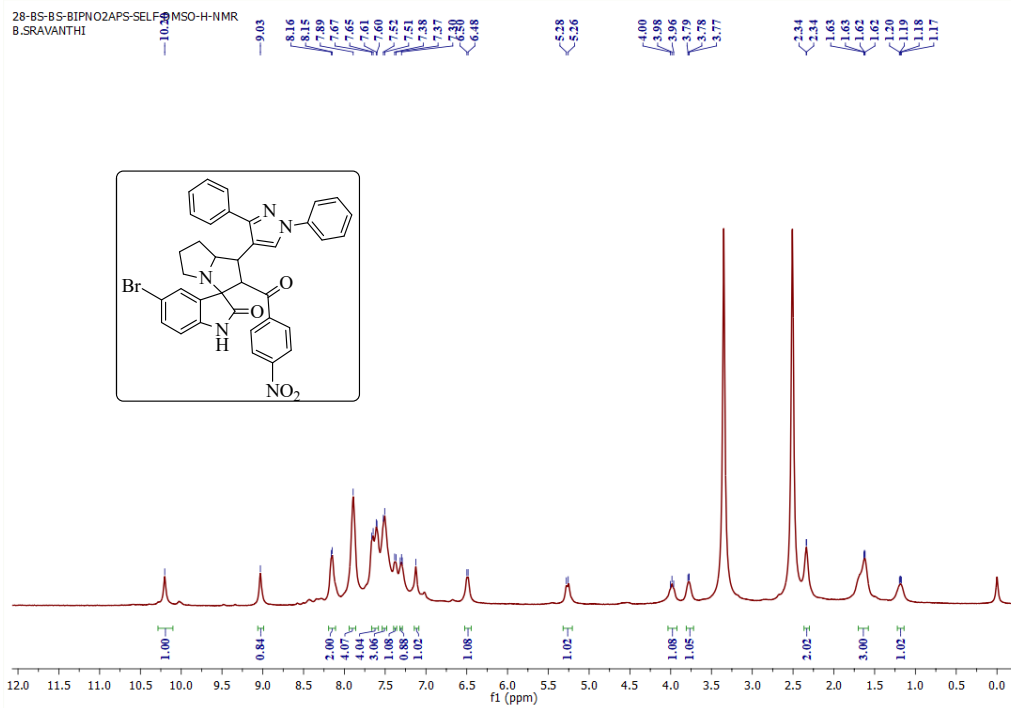

**<sup>1</sup>H NMR Spectrum of the compound 4aC**

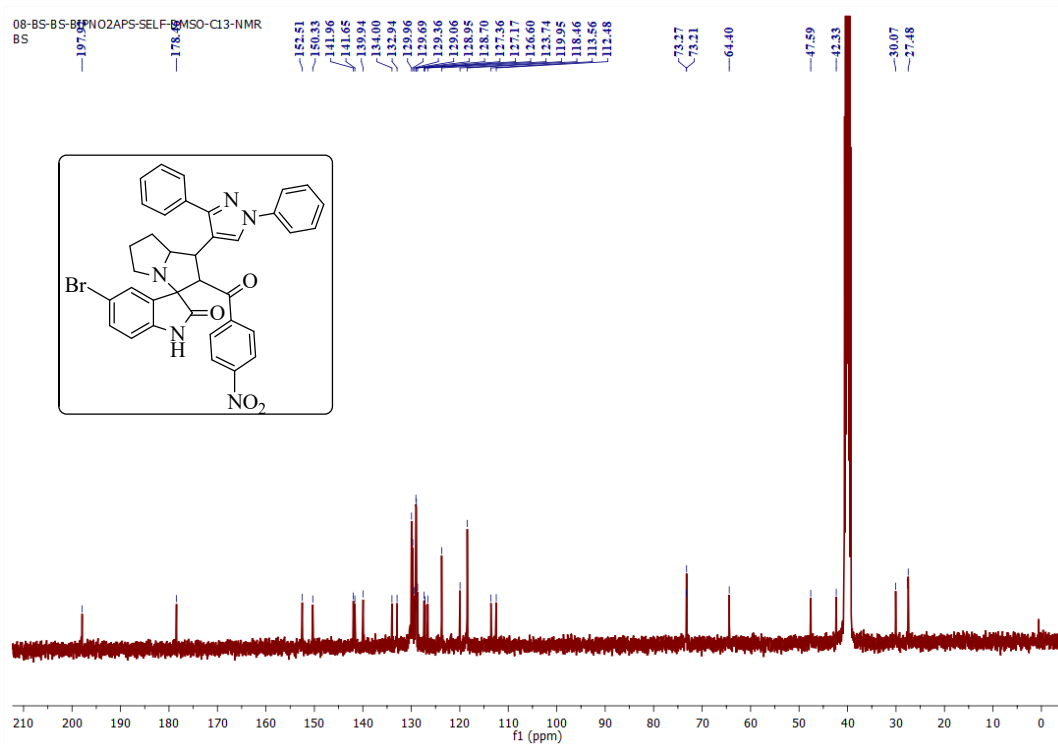

**<sup>13</sup>C NMR Spectrum of the compound 4aC**

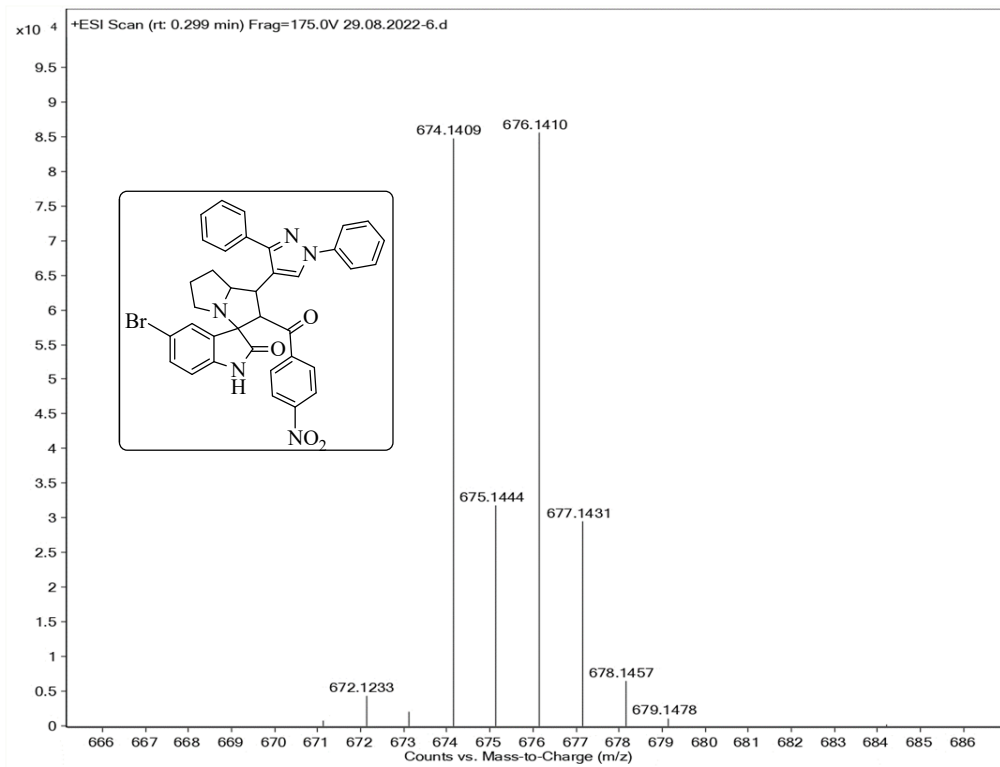

Mass spectrum of the compound 4ac

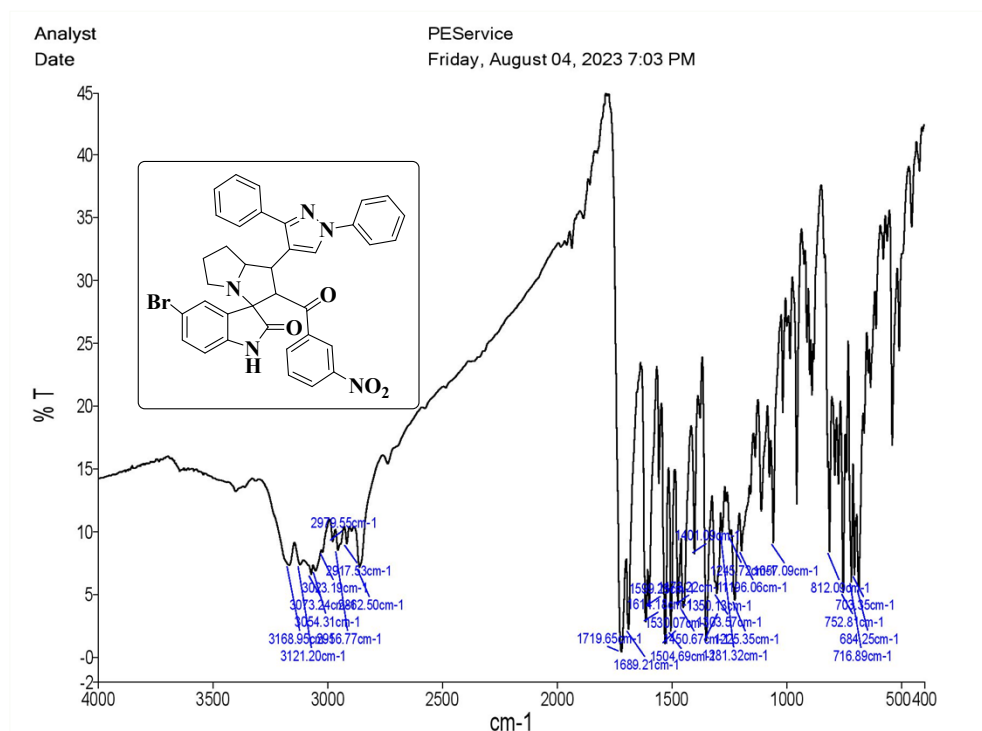

FT-IR Spectrum of the compound 4ad

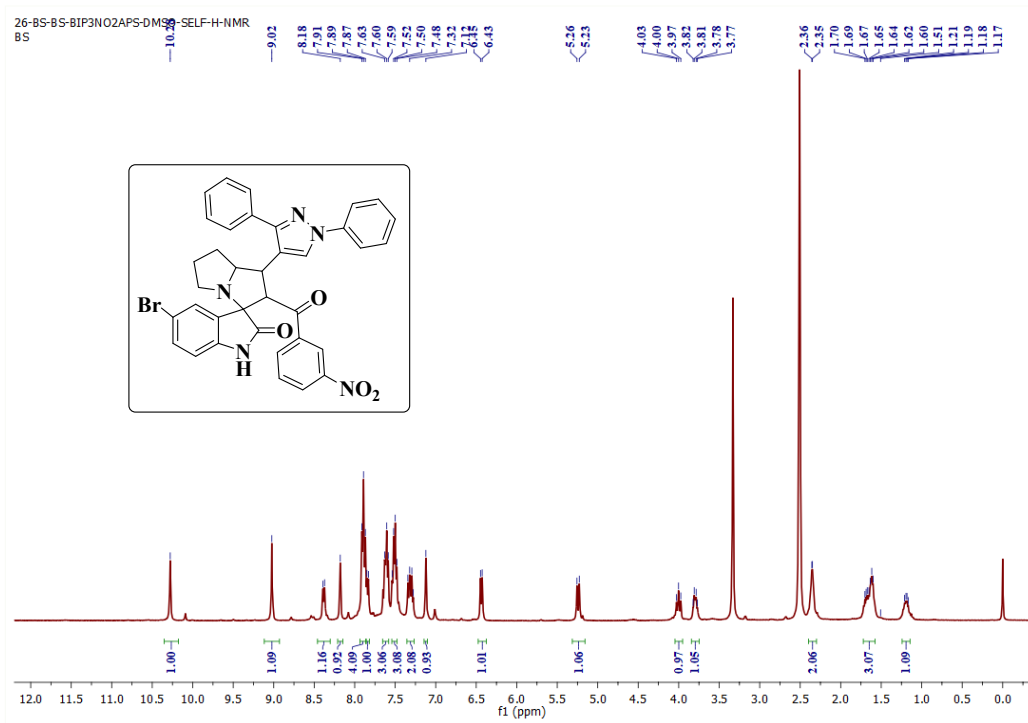

**<sup>1</sup>H NMR Spectrum of the compound 4ad**

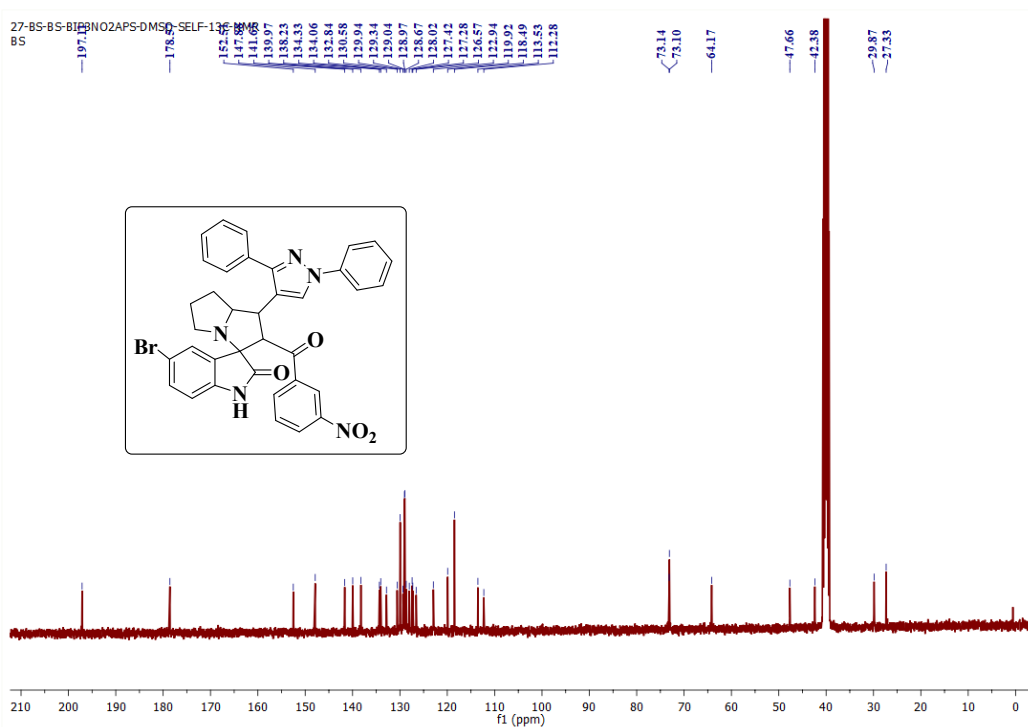

**<sup>13</sup>C NMR Spectrum of the compound 4ad**

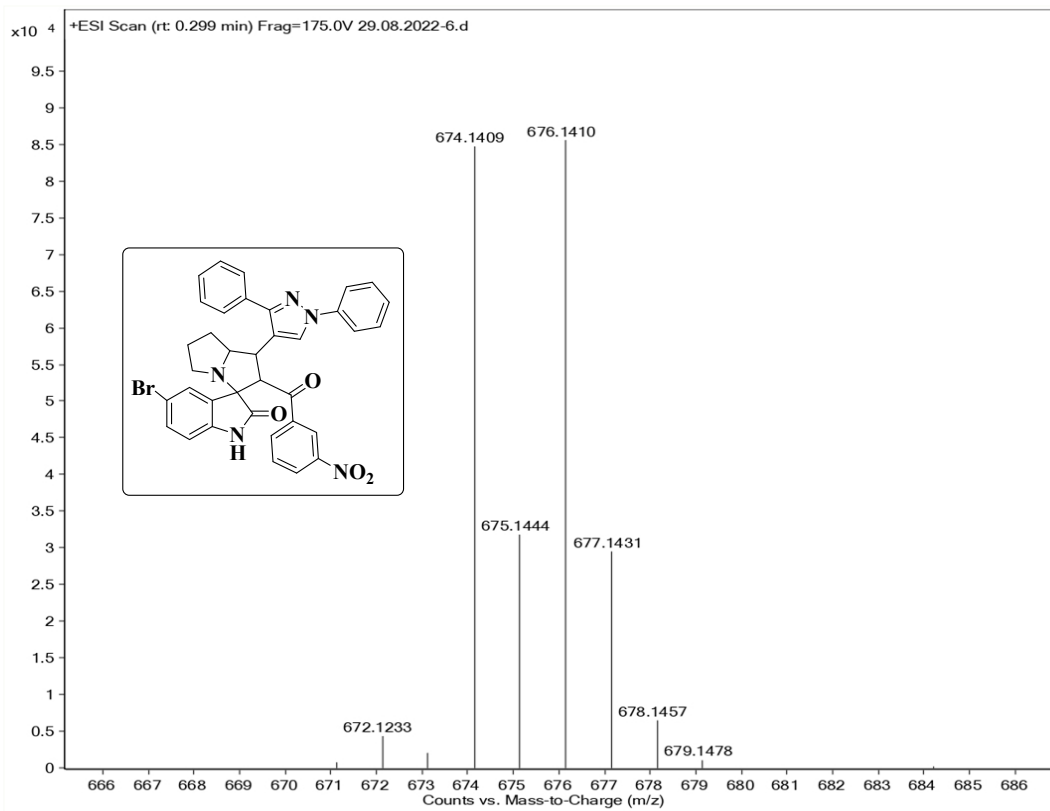

**Mass spectrum of the compound 4ad**

#### 4. Salient features of crystallographic data of compound 4b

| Identification code                                         | 4b                                                                |
|-------------------------------------------------------------|-------------------------------------------------------------------|
| Empirical formula                                           | C <sub>36</sub> H <sub>29</sub> FN <sub>4</sub> O <sub>2</sub>    |
| Formula weight                                              | 568.65                                                            |
| Crystal system                                              | Monoclinic                                                        |
| Space group                                                 | P 21/n                                                            |
| <i>T</i> (K)                                                | 293 K                                                             |
| <i>a</i> (Å)                                                | 11.1333(10)                                                       |
| <i>b</i> (Å)                                                | 11.4934(10)                                                       |
| <i>c</i> (Å)                                                | 22.104(2)                                                         |
| $\alpha$ (°)                                                | 90                                                                |
| $\beta$ (°)                                                 | 91.270(4)                                                         |
| $\gamma$ (°)                                                | 90                                                                |
| <i>Z</i>                                                    | 4                                                                 |
| <i>V</i> (Å <sup>3</sup> )                                  | 2827.7 (4)                                                        |
| <i>D</i> <sub>calc</sub> (g/cm <sup>3</sup> )               | 1.336                                                             |
| <i>F</i> (000)                                              | 1192.0                                                            |
| $\mu$ (mm <sup>-1</sup> )                                   | 0.089                                                             |
| $\theta$ (°)                                                | 26.998                                                            |
| Index ranges                                                | -14 ≤ <i>h</i> ≤ 14<br>-14 ≤ <i>k</i> ≤ 14<br>-28 ≤ <i>l</i> ≤ 28 |
| <i>N</i> -total                                             | 6177                                                              |
| Parameters                                                  | 389                                                               |
| <i>R</i> <sub>1</sub> [ <i>I</i> > 2 $\sigma$ ( <i>I</i> )] | 0.0414                                                            |
| <i>wR</i> <sub>2</sub> (all data)                           | 0.1027                                                            |
| GOF                                                         | 1.066                                                             |
| CCDC                                                        | 2330349                                                           |

## **5. In-vitro *MTB* MABA assay**

Briefly, the inoculum was prepared from fresh LJ medium re-suspended in 7H9-S medium (7H9 broth, 0.1% casitone, 0.5% glycerol, supplemented oleic acid, albumin, dextrose, and catalase [OADC]), adjusted to a OD<sub>590</sub> 1.0, and diluted 1:20; 100 µl was used as inoculum. Each drug stock solution was thawed and diluted in 7H9-S at four-fold the final highest concentration tested. Serial two-fold dilutions of each drug were prepared directly in a sterile 96-well microtiter plate using 100 µl 7H9-S. A growth control containing no antibiotic and a sterile control were also prepared on each plate. Sterile water was added to all perimeter wells to avoid evaporation during the incubation. The plate was covered, sealed in plastic bags and incubated at 37°C in normal atmosphere. After 7 days incubation, 30 µl of alamar blue solution was added to each well, and the plate was re-incubated overnight. A change in colour from blue (oxidised state) to pink (reduced) indicated the growth of bacteria, and the MIC was defined as the lowest concentration of drug that prevented this change in colour.

## **6. Cytotoxicity, % of inhibition assay**

Cytotoxicity was carried out in mouse macrophage cell line (RAW 264.7) at 25 µg/mL concentration. After 48 h of exposure, viability was assessed on the basis of cellular conversion of MTT into a formazan product using the cell proliferation assay. Cells were grown in RPMI medium supplemented with 10% fetal bovine serum (FBS), 10,000 units penicillin and 10 mg streptomycin per mL in T25 flasks to attain 80-90% confluency. Cells were scraped and seeded into wells approx 5,000 cells per well in poly-L-lysine coated plates. The microtiter plates were incubated at 37 °C, 5% CO<sub>2</sub> and 100% relative humidity for 24 h prior to addition of experimental drugs. The test compounds at 50 µg/mL concentrations were then added to cells and incubated at 37 °C for 48 h; later 10 µL of 0.5 mg/mL concentration of MTT was added and incubated for 3 h at 37 °C and the final product formazan crystals were measured at 595nm and 625nm.

## 7. Molecules 4a-4ad with their stereochemical configurations used in silico studies

| S. No. | Compound  | Name                                                                                                                                                                                           |
|--------|-----------|------------------------------------------------------------------------------------------------------------------------------------------------------------------------------------------------|
| 1      | <b>4a</b> | (1'S,2'R,3R,7a'R)-2'-benzoyl-1'-(1,3-diphenyl-1H-pyrazol-4-yl)-1',2',5',6',7',7a'-hexahydrospiro[indoline-3,3'-pyrrolizin]-2-one                                                               |
| 2      | <b>4b</b> | (1'S,2'R,3R,7a'R)-1'-(1,3-diphenyl-1H-pyrazol-4-yl)-2'-(4-fluorobenzoyl)-1',2',5',6',7',7a'-hexahydrospiro[indoline-3,3'-pyrrolizin]-2-one                                                     |
| 3      | <b>4c</b> | (1'S,2'R,3R,7a'R)-2'-(4-chlorobenzoyl)-1'-(1,3-diphenyl-1H-pyrazol-4-yl)-1',2',5',6',7',7a'-hexahydrospiro[indoline-3,3'-pyrrolizin]-2-one                                                     |
| 4      | <b>4d</b> | (1'S,2'R,3R,7a'R)-1'-(1,3-diphenyl-1H-pyrazol-4-yl)-2'-(4-methoxybenzoyl)-1',2',5',6',7',7a'-hexahydrospiro[indoline-3,3'-pyrrolizin]-2-one                                                    |
| 5      | <b>4e</b> | (1'S,2'R,3S,7a'R)-1'-(1,3-dicyclohexyl-1H-pyrazol-4-yl)-2'-(4-nitrobenzoyl)dodecahydrospiro[indole-3,3'-pyrrolizin]-2(1H)-one                                                                  |
| 6      | <b>4f</b> | (1'S,2'R,3R,7a'R)-1'-(1,3-diphenyl-1H-pyrazol-4-yl)-2'-(3-nitrobenzoyl)-1',2',5',6',7',7a'-hexahydrospiro[indoline-3,3'-pyrrolizin]-2-one                                                      |
| 7      | <b>4g</b> | (1'R,2'S,3R,7a'R)-1'-(3-(cyclohexa-2,5-dien-1-ylidene)-1-phenyl-2,3-dihydro-1H-pyrazol-4-yl)-2'-(tetrahydrofuran-2-carbonyl)-1',2',5',6',7',7a'-hexahydrospiro[indoline-3,3'-pyrrolizin]-2-one |
| 8      | <b>4h</b> | (1'R,2'S,3R,7a'R)-1'-(3-(cyclohexa-2,5-dien-1-ylidene)-1-phenyl-2,3-dihydro-1H-pyrazol-4-yl)-2'-(thiophene-2-carbonyl)-1',2',5',6',7',7a'-hexahydrospiro[indoline-3,3'-pyrrolizin]-2-one       |
| 9      | <b>4i</b> | (1'S,2'R,3R,7a'R)-2'-benzoyl-1'-(1,3-diphenyl-1H-pyrazol-4-yl)-1-methyl-1',2',5',6',7',7a'-hexahydrospiro[indoline-3,3'-pyrrolizin]-2-one                                                      |
| 10     | <b>4j</b> | (1'S,2'R,3R,7a'R)-2'-(4-chlorobenzoyl)-1'-(1,3-diphenyl-1H-pyrazol-4-yl)-1-methyl-1',2',5',6',7',7a'-hexahydrospiro[indoline-3,3'-pyrrolizin]-2-one                                            |
| 11     | <b>4k</b> | (1'S,2'R,3R,7a'R)-1'-(1,3-diphenyl-1H-pyrazol-4-yl)-2'-(4-methoxybenzoyl)-1-methyl-1',2',5',6',7',7a'-hexahydrospiro[indoline-3,3'-pyrrolizin]-2-one                                           |
| 12     | <b>4l</b> | (1'S,2'R,3R,7a'R)-1'-(1,3-diphenyl-1H-pyrazol-4-yl)-1-methyl-2'-(4-nitrobenzoyl)-1',2',5',6',7',7a'-hexahydrospiro[indoline-3,3'-pyrrolizin]-2-one                                             |
| 13     | <b>4m</b> | (1'S,2'R,3R,7a'R)-1'-(1,3-diphenyl-1H-pyrazol-4-yl)-1-methyl-2'-(tetrahydrothiophene-2-carbonyl)-1',2',5',6',7',7a'-hexahydrospiro[indoline-3,3'-pyrrolizin]-2-one                             |
| 14     | <b>4n</b> | (1'S,2'R,3R,7a'R)-1-benzyl-1'-(1,3-diphenyl-1H-pyrazol-4-yl)-2'-(4-methoxybenzoyl)-1',2',5',6',7',7a'-hexahydrospiro[indoline-3,3'-                                                            |



|    |            |                                                                                                                                                                                                                     |
|----|------------|---------------------------------------------------------------------------------------------------------------------------------------------------------------------------------------------------------------------|
|    |            | pyrrolizin]-2-one                                                                                                                                                                                                   |
| 15 | <b>4o</b>  | (1'S,2'R,3R,7a'R)-1-butyl-2'-(4-chlorobenzoyl)-1'-(1,3-diphenyl-1H-pyrazol-4-yl)-1',2',5',6',7',7a'-hexahydrospiro[indoline-3,3'-pyrrolizin]-2-one                                                                  |
| 16 | <b>4p</b>  | (1'S,2'R,3R,7a'R)-2'-(4-bromobenzoyl)-1'-(1,3-diphenyl-1H-pyrazol-4-yl)-1-(prop-2-yn-1-yl)-1',2',5',6',7',7a'-hexahydrospiro[indoline-3,3'-pyrrolizin]-2-one                                                        |
| 17 | <b>4q</b>  | (1'S,2'R,3R,7a'R)-2'-(4-bromobenzoyl)-1'-(1,3-diphenyl-1H-pyrazol-4-yl)-1-(prop-2-yn-1-yl)-1',2',5',6',7',7a'-hexahydrospiro[indoline-3,3'-pyrrolizin]-2-one                                                        |
| 18 | <b>4r</b>  | (1'S,2'R,3R,7a'R)-2'-(4-chlorobenzoyl)-1'-(1,3-diphenyl-1H-pyrazol-4-yl)-5-fluoro-1',2',5',6',7',7a'-hexahydrospiro[indoline-3,3'-pyrrolizin]-2-one                                                                 |
| 19 | <b>4s</b>  | (1'S,2'R,3R,7a'R)-2'-(4-bromobenzoyl)-1'-(1,3-diphenyl-1H-pyrazol-4-yl)-5-fluoro-1',2',5',6',7',7a'-hexahydrospiro[indoline-3,3'-pyrrolizin]-2-one                                                                  |
| 20 | <b>4t</b>  | (1'S,2'R,3R,7a'R)-1'-(1,3-diphenyl-1H-pyrazol-4-yl)-5-fluoro-2'-(4-methoxybenzoyl)-1',2',5',6',7',7a'-hexahydrospiro[indoline-3,3'-pyrrolizin]-2-one                                                                |
| 21 | <b>4u</b>  | (1'S,2'R,3R,7a'R)-1'-(1,3-diphenyl-1H-pyrazol-4-yl)-5-fluoro-2'-(4-nitrobenzoyl)-1',2',5',6',7',7a'-hexahydrospiro[indoline-3,3'-pyrrolizin]-2-one                                                                  |
| 22 | <b>4v</b>  | (1'S,2'R,3R,7a'R)-1'-(1,3-diphenyl-1H-pyrazol-4-yl)-5-fluoro-2'-(3-nitrobenzoyl)-1',2',5',6',7',7a'-hexahydrospiro[indoline-3,3'-pyrrolizin]-2-one                                                                  |
| 23 | <b>4w</b>  | (1'R,2'S,3R,7a'R)-1'-(3-(cyclohexa-2,5-dien-1-ylidene)-1-phenyl-2,3-dihydro-1H-pyrazol-4-yl)-5-fluoro-2'-((Z)-furan-2(5H)-ylidene(hydroxy)methyl)-1',2',5',6',7',7a'-hexahydrospiro[indoline-3,3'-pyrrolizin]-2-one |
| 24 | <b>4x</b>  | (1'R,2'S,3R,7a'R)-1'-(3-(cyclohexa-2,5-dien-1-ylidene)-1-phenyl-2,3-dihydro-1H-pyrazol-4-yl)-5-fluoro-2'-(thiophene-2-carbonyl)-1',2',5',6',7',7a'-hexahydrospiro[indoline-3,3'-pyrrolizin]-2-one                   |
| 25 | <b>4y</b>  | (1'S,2'R,3R,7a'R)-2'-benzoyl-5-bromo-1'-(1,3-diphenyl-1H-pyrazol-4-yl)-1',2',5',6',7',7a'-hexahydrospiro[indoline-3,3'-pyrrolizin]-2-one                                                                            |
| 26 | <b>4z</b>  | (1'S,2'R,3R,7a'R)-5-bromo-1'-(1,3-diphenyl-1H-pyrazol-4-yl)-2'-(4-fluorobenzoyl)-1',2',5',6',7',7a'-hexahydrospiro[indoline-3,3'-pyrrolizin]-2-one                                                                  |
| 27 | <b>4aa</b> | (1'S,2'R,3R,7a'R)-5-bromo-2'-(4-chlorobenzoyl)-1'-(1,3-diphenyl-1H-pyrazol-4-yl)-1',2',5',6',7',7a'-hexahydrospiro[indoline-3,3'-pyrrolizin]-2-one                                                                  |

|    |            |                                                                                                                                                     |
|----|------------|-----------------------------------------------------------------------------------------------------------------------------------------------------|
| 28 | <b>4ab</b> | (1'S,2'R,3R,7a'R)-5-bromo-1'-(1,3-diphenyl-1H-pyrazol-4-yl)-2'-(4-methoxybenzoyl)-1',2',5',6',7',7a'-hexahydrospiro[indoline-3,3'-pyrrolizin]-2-one |
| 29 | <b>4ac</b> | (1'S,2'R,3R,7a'R)-5-bromo-1'-(1,3-diphenyl-1H-pyrazol-4-yl)-2'-(4-nitrobenzoyl)-1',2',5',6',7',7a'-hexahydrospiro[indoline-3,3'-pyrrolizin]-2-one   |
| 30 | <b>4ad</b> | (1'S,2'R,3R,7a'R)-5-bromo-1'-(1,3-diphenyl-1H-pyrazol-4-yl)-2'-(3-nitrobenzoyl)-1',2',5',6',7',7a'-hexahydrospiro[indoline-3,3'-pyrrolizin]-2-one   |

**Bulk purity of the synthesized compound 4c; (500 mg and 100 mg scale reactions)**

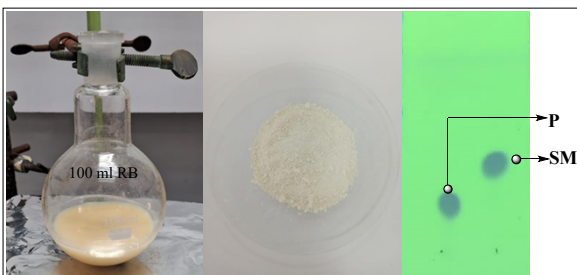

### 500 mg scale reaction

(TLC: Solvent system: *n*-hexane : EtOAc (7:3)  
P = Product, SM = Starting Material)

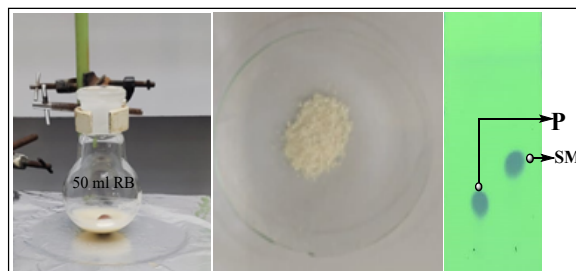

### 100 mg scale reaction

(TLC: Solvent system: *n*-hexane : EtOAc (7:3)  
P = Product, SM = Starting Material)

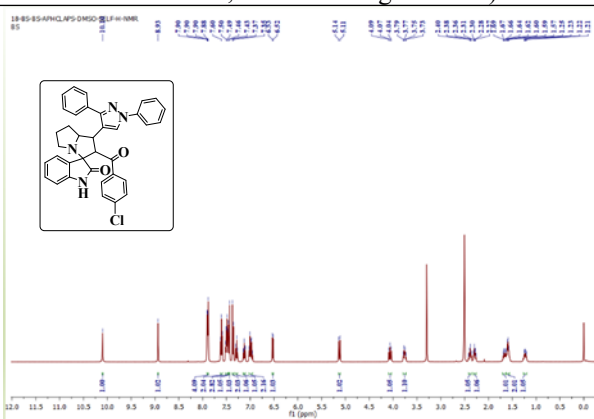

<sup>1</sup>H NMR Spectrum of the compound **4c**

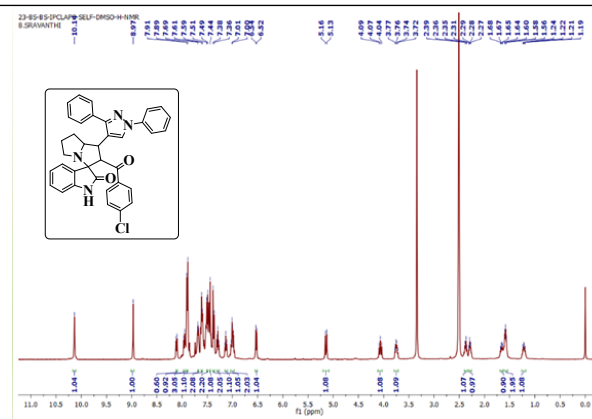

<sup>13</sup>C NMR Spectrum of the compound **4c**

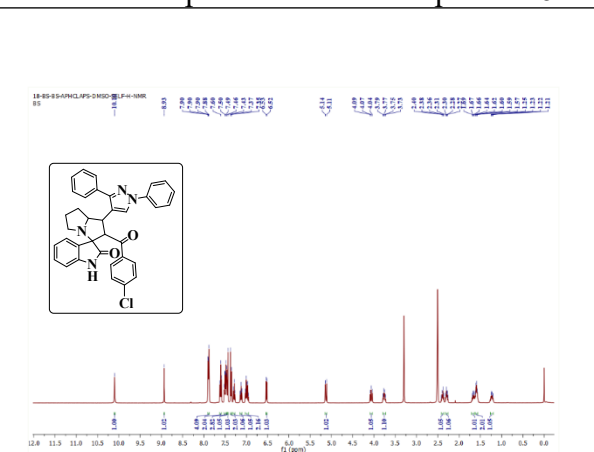

<sup>1</sup>H NMR Spectrum of the compound **4c**

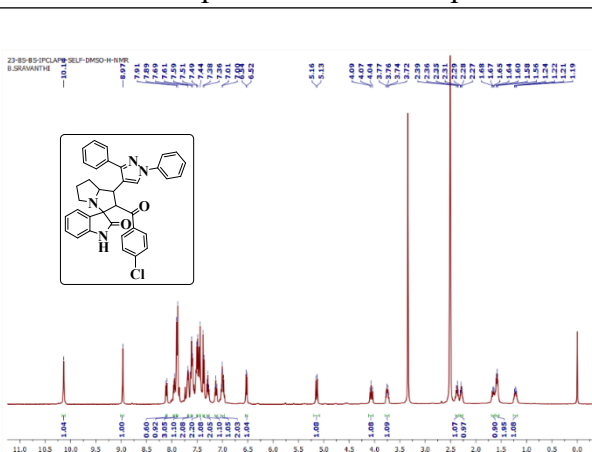

<sup>13</sup>C NMR Spectrum of the compound **4c**
